# Supplementary material for: Evaluating Geometric Measurement Accuracy Based on 3D Reconstruction of Automated Imagery in a Greenhouse
Source: Sensors (Basel). 2018 Jul 13;18(7):2270. doi: 10.3390/s18072270 (PMC6068631; doi:10.3390/s18072270)
Supplement: Supplementary file 1 [file sensors-18-02270-s001.xlsx]

## Sheet: Image measured dimensions
runs	Overlap-x	Overlap-y	SR	POU	Level	Object	No.	Ground truth			Measured value (Mean)			Measured value (STD)			Error
								x	y	z	x	y	z	x	y	z	x	y	z
1	0.9	0.95	High	556	1	O1	1	98.14	72.7333	47.4933	97.8333	68.3	43.9063	0.348984	2.36553	0.298254	0.306667	4.43333	3.58699
1	0.9	0.95	High	556	1	O1	1	98.14	72.7333	47.4933	97	70.4	43.9969				1.14	2.33333	3.49647
1	0.9	0.95	High	556	1	O1	1	98.14	72.7333	47.4933	97.3667	70.2	44.0911				0.773333	2.53333	3.40225
1	0.9	0.95	High	556	1	O1	1	98.14	72.7333	47.4933	96.8	68.7	44.1823				1.34	4.03333	3.31108
1	0.9	0.95	High	556	1	O1	1	98.14	72.7333	47.4933	97.2667	70.3333	44.2787				0.873333	2.4	3.21462
1	0.9	0.95	High	556	1	O1	1	98.14	72.7333	47.4933	96.8333	71.2	44.3806				1.30667	1.53333	3.11275
1	0.9	0.95	High	556	1	O1	1	98.14	72.7333	47.4933	96.7333	67.0333	44.4831				1.40667	5.7	3.01021
1	0.9	0.95	High	556	1	O1	1	98.14	72.7333	47.4933	96.9667	65.8667	44.5863				1.17333	6.86667	2.90705
1	0.9	0.95	High	556	1	O1	1	98.14	72.7333	47.4933	97.2667	68.7667	44.6873				0.873333	3.96667	2.80605
1	0.9	0.95	High	556	1	O1	1	98.14	72.7333	47.4933	96.7667	63.6	44.7882				1.37333	9.13333	2.70517
1	0.9	0.95	High	556	1	O1	2	98.2033	72.8067	47.03	96.5667	70.7	45.2842	0.29866	3.30208	0.303197	1.63667	2.10667	1.74577
1	0.9	0.95	High	556	1	O1	2	98.2033	72.8067	47.03	96.7	72.1	45.3817				1.50333	0.706667	1.64832
1	0.9	0.95	High	556	1	O1	2	98.2033	72.8067	47.03	96.6	71.7667	45.4814				1.60333	1.04	1.54859
1	0.9	0.95	High	556	1	O1	2	98.2033	72.8067	47.03	95.8	71.9333	45.5832				2.40333	0.873333	1.44683
1	0.9	0.95	High	556	1	O1	2	98.2033	72.8067	47.03	96.4667	71.9	45.685				1.73667	0.906667	1.345
1	0.9	0.95	High	556	1	O1	2	98.2033	72.8067	47.03	96.3	62.9	45.7871				1.90333	9.90667	1.24288
1	0.9	0.95	High	556	1	O1	2	98.2033	72.8067	47.03	96.4	68.4333	45.8852				1.80333	4.37333	1.14476
1	0.9	0.95	High	556	1	O1	2	98.2033	72.8067	47.03	96.0333	65.5667	45.9829				2.17	7.24	1.04715
1	0.9	0.95	High	556	1	O1	2	98.2033	72.8067	47.03	96.7333	69.3	46.0828				1.47	3.50667	0.947186
1	0.9	0.95	High	556	1	O1	2	98.2033	72.8067	47.03	96.2333	65.6	46.1842				1.97	7.20667	0.845798
1	0.9	0.95	High	556	1	O1	3	98.1133	72.7433	46.27	97.2667	71.8	44.8983	0.265297	1.29289	0.323906	0.846667	0.943333	1.3717
1	0.9	0.95	High	556	1	O1	3	98.1133	72.7433	46.27	97.7333	72	45.0026				0.38	0.743333	1.26741
1	0.9	0.95	High	556	1	O1	3	98.1133	72.7433	46.27	97.6	71.1333	45.1086				0.513333	1.61	1.16142
1	0.9	0.95	High	556	1	O1	3	98.1133	72.7433	46.27	97.2	72.4667	45.2171				0.913333	0.276667	1.0529
1	0.9	0.95	High	556	1	O1	3	98.1133	72.7433	46.27	97.1667	73.4667	45.3253				0.946667	0.723333	0.944657
1	0.9	0.95	High	556	1	O1	3	98.1133	72.7433	46.27	97.2	70.3333	45.4317				0.913333	2.41	0.838332
1	0.9	0.95	High	556	1	O1	3	98.1133	72.7433	46.27	97.7667	68.9667	45.5358				0.346667	3.77667	0.734237
1	0.9	0.95	High	556	1	O1	3	98.1133	72.7433	46.27	97.4667	71.6667	45.6438				0.646667	1.07667	0.62617
1	0.9	0.95	High	556	1	O1	3	98.1133	72.7433	46.27	97.8667	70.6333	45.7514				0.246667	2.11	0.518586
1	0.9	0.95	High	556	1	O1	3	98.1133	72.7433	46.27	97.6333	72.6	45.8618				0.48	0.143333	0.408194
1	0.9	0.95	High	556	1	O2	1	65.9933	65.9933	94.82	63.64	62.04	89.9625	0.22152	0.381669	0.298436	2.35333	3.95333	4.8575
1	0.9	0.95	High	556	1	O2	1	65.9933	65.9933	94.82	63.72	62.04	90.0702				2.27333	3.95333	4.74984
1	0.9	0.95	High	556	1	O2	1	65.9933	65.9933	94.82	63.34	62.8	90.1796				2.65333	3.19333	4.64037
1	0.9	0.95	High	556	1	O2	1	65.9933	65.9933	94.82	63.54	62.6	90.2695				2.45333	3.39333	4.55051
1	0.9	0.95	High	556	1	O2	1	65.9933	65.9933	94.82	63.88	62.28	90.3718				2.11333	3.71333	4.44825
1	0.9	0.95	High	556	1	O2	1	65.9933	65.9933	94.82	63.4	62.7	90.4798				2.59333	3.29333	4.34019
1	0.9	0.95	High	556	1	O2	1	65.9933	65.9933	94.82	64.02	62.18	90.5639				1.97333	3.81333	4.25607
1	0.9	0.95	High	556	1	O2	1	65.9933	65.9933	94.82	63.78	62.5	90.6585				2.21333	3.49333	4.16148
1	0.9	0.95	High	556	1	O2	1	65.9933	65.9933	94.82	63.46	63.12	90.7601				2.53333	2.87333	4.05995
1	0.9	0.95	High	556	1	O2	1	65.9933	65.9933	94.82	63.48	61.98	90.8563				2.51333	4.01333	3.96367
1	0.9	0.95	High	556	1	O2	2	64.885	64.885	94.8967	62.66	61.96	90.995	0.227694	0.69391	0.216572	2.225	2.925	3.90165
1	0.9	0.95	High	556	1	O2	2	64.885	64.885	94.8967	62.54	61.94	91.0693				2.345	2.945	3.82733
1	0.9	0.95	High	556	1	O2	2	64.885	64.885	94.8967	62.88	61.62	91.1403				2.005	3.265	3.75633
1	0.9	0.95	High	556	1	O2	2	64.885	64.885	94.8967	62.36	61.76	91.2128				2.525	3.125	3.68391
1	0.9	0.95	High	556	1	O2	2	64.885	64.885	94.8967	62.88	60.62	91.2836				2.005	4.265	3.61303
1	0.9	0.95	High	556	1	O2	2	64.885	64.885	94.8967	62.78	62.16	91.3543				2.105	2.725	3.54236
1	0.9	0.95	High	556	1	O2	2	64.885	64.885	94.8967	62.36	61.58	91.4291				2.525	3.305	3.46761
1	0.9	0.95	High	556	1	O2	2	64.885	64.885	94.8967	62.86	60.42	91.4985				2.025	4.465	3.3982
1	0.9	0.95	High	556	1	O2	2	64.885	64.885	94.8967	62.3	60.4	91.5669				2.585	4.485	3.32973
1	0.9	0.95	High	556	1	O2	2	64.885	64.885	94.8967	62.68	60.74	91.6405				2.205	4.145	3.2562
1	0.9	0.95	High	556	1	O2	3	63.6867	63.6867	94.8967	61.0167	58.5333	92.1122	0.554791	0.838473	0.173789	2.67	5.15333	2.78446
1	0.9	0.95	High	556	1	O2	3	63.6867	63.6867	94.8967	61.3833	58.65	92.1729				2.30333	5.03667	2.72378
1	0.9	0.95	High	556	1	O2	3	63.6867	63.6867	94.8967	60.7833	58.4333	92.2136				2.90333	5.25333	2.6831
1	0.9	0.95	High	556	1	O2	3	63.6867	63.6867	94.8967	61.75	57.9	92.2882				1.93667	5.78667	2.60842
1	0.9	0.95	High	556	1	O2	3	63.6867	63.6867	94.8967	61.7	58.3667	92.3418				1.98667	5.32	2.55491
1	0.9	0.95	High	556	1	O2	3	63.6867	63.6867	94.8967	61.1	57.6833	92.3983				2.58667	6.00333	2.49835
1	0.9	0.95	High	556	1	O2	3	63.6867	63.6867	94.8967	60.4167	57.2833	92.4595				3.27	6.40333	2.43717
1	0.9	0.95	High	556	1	O2	3	63.6867	63.6867	94.8967	61.3833	57.2333	92.5107				2.30333	6.45333	2.38598
1	0.9	0.95	High	556	1	O2	3	63.6867	63.6867	94.8967	61.4833	55.9333	92.5685				2.20333	7.75333	2.32814
1	0.9	0.95	High	556	1	O2	3	63.6867	63.6867	94.8967	62.4	57.25	92.628				1.28667	6.43667	2.26869
1	0.9	0.95	High	556	1	O3	1	120.858	120.858	154.833	115.3	123.1	150.561	1.96245	0.239444	0.267505	5.5575	2.2425	4.27252
1	0.9	0.95	High	556	1	O3	1	120.858	120.858	154.833	116.9	122.9	150.664				3.9575	2.0425	4.16898
1	0.9	0.95	High	556	1	O3	1	120.858	120.858	154.833	114.5	123.1	150.75				6.3575	2.2425	4.08377
1	0.9	0.95	High	556	1	O3	1	120.858	120.858	154.833	118.9	122.5	150.846				1.9575	1.6425	3.98737
1	0.9	0.95	High	556	1	O3	1	120.858	120.858	154.833	115.4	122.8	150.935				5.4575	1.9425	3.89803
1	0.9	0.95	High	556	1	O3	1	120.858	120.858	154.833	119.3	122.5	151.008				1.5575	1.6425	3.82513
1	0.9	0.95	High	556	1	O3	1	120.858	120.858	154.833	118.6	122.9	151.104				2.2575	2.0425	3.72968
1	0.9	0.95	High	556	1	O3	1	120.858	120.858	154.833	119.5	122.5	151.193				1.3575	1.6425	3.64048
1	0.9	0.95	High	556	1	O3	1	120.858	120.858	154.833	116.6	122.9	151.277				4.2575	2.0425	3.55643
1	0.9	0.95	High	556	1	O3	1	120.858	120.858	154.833	119.7	122.6	151.363				1.1575	1.7425	3.46986
1	0.9	0.95	High	556	1	O3	2	119.83	119.83	155.667	115.8	122	152.571	0.810281	0.422164	0.212832	4.03	2.17	3.09559
1	0.9	0.95	High	556	1	O3	2	119.83	119.83	155.667	118.4	121.9	152.571				1.43	2.07	3.09559
1	0.9	0.95	High	556	1	O3	2	119.83	119.83	155.667	118.6	122.2	152.67				1.23	2.37	2.99711
1	0.9	0.95	High	556	1	O3	2	119.83	119.83	155.667	118.2	121.3	152.77				1.63	1.47	2.89679
1	0.9	0.95	High	556	1	O3	2	119.83	119.83	155.667	117.5	120.7	152.868				2.33	0.87	2.79845
1	0.9	0.95	High	556	1	O3	2	119.83	119.83	155.667	118.2	121.9	152.872				1.63	2.07	2.79477
1	0.9	0.95	High	556	1	O3	2	119.83	119.83	155.667	118.3	121.6	152.969				1.53	1.77	2.69719
1	0.9	0.95	High	556	1	O3	2	119.83	119.83	155.667	117.8	121.8	153.07				2.03	1.97	2.59698
1	0.9	0.95	High	556	1	O3	2	119.83	119.83	155.667	118.4	121.6	153.07				1.43	1.77	2.59698
1	0.9	0.95	High	556	1	O3	2	119.83	119.83	155.667	117.9	121.6	153.17				1.93	1.77	2.4965
1	0.9	0.95	High	556	1	O3	3	121.557	121.557	154.25	119.7	116.6	150.427	1.0615	4.02466	0.34198	1.85667	4.95667	3.82327
1	0.9	0.95	High	556	1	O3	3	121.557	121.557	154.25	119.9	107	150.533				1.65667	14.5567	3.71677
1	0.9	0.95	High	556	1	O3	3	121.557	121.557	154.25	117.4	117	150.627				4.15667	4.55667	3.62297
1	0.9	0.95	High	556	1	O3	3	121.557	121.557	154.25	120.4	116.1	150.742				1.15667	5.45667	3.50834
1	0.9	0.95	High	556	1	O3	3	121.557	121.557	154.25	120.1	119.6	150.872				1.45667	1.95667	3.37752
1	0.9	0.95	High	556	1	O3	3	121.557	121.557	154.25	119.3	120.8	150.977				2.25667	0.756667	3.27304
1	0.9	0.95	High	556	1	O3	3	121.557	121.557	154.25	118.8	119.6	151.09				2.75667	1.95667	3.15987
1	0.9	0.95	High	556	1	O3	3	121.557	121.557	154.25	117.7	120	151.212				3.85667	1.55667	3.03771
1	0.9	0.95	High	556	1	O3	3	121.557	121.557	154.25	118.1	119.5	151.325				3.45667	2.05667	2.92536
1	0.9	0.95	High	556	1	O3	3	121.557	121.557	154.25	118.3	119.1	151.428				3.25667	2.45667	2.82155
1	0.9	0.85	High	185	3	O1	1	98.14	72.7333	47.4933	95.8667	64.3667	42.2858	0.532128	1.80874	0.519221	2.27333	8.36667	5.20755
1	0.9	0.85	High	185	3	O1	1	98.14	72.7333	47.4933	95.4667	65.0667	42.454				2.67333	7.66667	5.03936
1	0.9	0.85	High	185	3	O1	1	98.14	72.7333	47.4933	93.8	66.4667	42.6324				4.34	6.26667	4.86097
1	0.9	0.85	High	185	3	O1	1	98.14	72.7333	47.4933	95	68.9	42.8034				3.14	3.83333	4.68994
1	0.9	0.85	High	185	3	O1	1	98.14	72.7333	47.4933	94.8	67.0667	42.9705				3.34	5.66667	4.52288
1	0.9	0.85	High	185	3	O1	1	98.14	72.7333	47.4933	95.0667	64.9667	43.1389				3.07333	7.76667	4.35441
1	0.9	0.85	High	185	3	O1	1	98.14	72.7333	47.4933	95.2	67.8333	43.3226				2.94	4.9	4.17072
1	0.9	0.85	High	185	3	O1	1	98.14	72.7333	47.4933	94.8333	64.1	43.505				3.30667	8.63333	3.98829
1	0.9	0.85	High	185	3	O1	1	98.14	72.7333	47.4933	94.9	63.0667	43.6609				3.24	9.66667	3.83244
1	0.9	0.85	High	185	3	O1	1	98.14	72.7333	47.4933	95.1333	65.9	43.814				3.00667	6.83333	3.67929
1	0.9	0.85	High	185	3	O1	2	98.2033	72.8067	47.03	95.5333	67.4333	43.885	0.431706	2.01663	0.52898	2.67	5.37333	3.14501
1	0.9	0.85	High	185	3	O1	2	98.2033	72.8067	47.03	94.2333	64.9333	44.0564				3.97	7.87333	2.97363
1	0.9	0.85	High	185	3	O1	2	98.2033	72.8067	47.03	95.7	70.6	44.2253				2.50333	2.20667	2.80468
1	0.9	0.85	High	185	3	O1	2	98.2033	72.8067	47.03	95	70.1333	44.406				3.20333	2.67333	2.62399
1	0.9	0.85	High	185	3	O1	2	98.2033	72.8067	47.03	95.0667	67.8	44.5818				3.13667	5.00667	2.44817
1	0.9	0.85	High	185	3	O1	2	98.2033	72.8067	47.03	94.8	70.8333	44.7604				3.40333	1.97333	2.26962
1	0.9	0.85	High	185	3	O1	2	98.2033	72.8067	47.03	94.9667	65.9667	44.9309				3.23667	6.84	2.09908
1	0.9	0.85	High	185	3	O1	2	98.2033	72.8067	47.03	95.0333	68.3667	45.091				3.17	4.44	1.93901
1	0.9	0.85	High	185	3	O1	2	98.2033	72.8067	47.03	94.7667	68.6667	45.2744				3.43667	4.14	1.75556
1	0.9	0.85	High	185	3	O1	2	98.2033	72.8067	47.03	95.5	66.3	45.4647				2.70333	6.50667	1.56526
1	0.9	0.85	High	185	3	O1	3	98.1133	72.7433	46.27	94.7333	70.1667	42.1322	0.472777	1.78844	0.710459	3.38	2.57667	4.13782
1	0.9	0.85	High	185	3	O1	3	98.1133	72.7433	46.27	95.3333	66.1667	42.3874				2.78	6.57667	3.88257
1	0.9	0.85	High	185	3	O1	3	98.1133	72.7433	46.27	95.3333	70.5333	42.6107				2.78	2.21	3.65934
1	0.9	0.85	High	185	3	O1	3	98.1133	72.7433	46.27	95.4	70.3333	42.8432				2.71333	2.41	3.42677
1	0.9	0.85	High	185	3	O1	3	98.1133	72.7433	46.27	94.2	70.3333	43.0955				3.91333	2.41	3.17454
1	0.9	0.85	High	185	3	O1	3	98.1133	72.7433	46.27	94.5333	70.3	43.3165				3.58	2.44333	2.95354
1	0.9	0.85	High	185	3	O1	3	98.1133	72.7433	46.27	94.9333	68.4	43.5534				3.18	4.34333	2.71664
1	0.9	0.85	High	185	3	O1	3	98.1133	72.7433	46.27	94.7	68.5667	43.7867				3.41333	4.17667	2.48329
1	0.9	0.85	High	185	3	O1	3	98.1133	72.7433	46.27	95.7333	65.8333	44.011				2.38	6.91	2.25903
1	0.9	0.85	High	185	3	O1	3	98.1133	72.7433	46.27	95.2667	70.1333	44.2566				2.84667	2.61	2.0134
1	0.9	0.85	High	185	3	O2	1	65.9933	65.9933	94.82	62.4	60.14	87.7332	0.659616	0.530559	0.344585	3.59333	5.85333	7.08679
1	0.9	0.85	High	185	3	O2	1	65.9933	65.9933	94.82	62.94	59.86	87.8491				3.05333	6.13333	6.97092
1	0.9	0.85	High	185	3	O2	1	65.9933	65.9933	94.82	62.84	60.24	87.965				3.15333	5.75333	6.85503
1	0.9	0.85	High	185	3	O2	1	65.9933	65.9933	94.82	62.42	58.88	88.0768				3.57333	7.11333	6.74317
1	0.9	0.85	High	185	3	O2	1	65.9933	65.9933	94.82	62.96	60.2	88.1895				3.03333	5.79333	6.63053
1	0.9	0.85	High	185	3	O2	1	65.9933	65.9933	94.82	60.78	60.68	88.2985				5.21333	5.31333	6.52152
1	0.9	0.85	High	185	3	O2	1	65.9933	65.9933	94.82	62.76	60.22	88.4162				3.23333	5.77333	6.40375
1	0.9	0.85	High	185	3	O2	1	65.9933	65.9933	94.82	62.68	59.96	88.534				3.31333	6.03333	6.28596
1	0.9	0.85	High	185	3	O2	1	65.9933	65.9933	94.82	62.98	59.24	88.6461				3.01333	6.75333	6.17386
1	0.9	0.85	High	185	3	O2	1	65.9933	65.9933	94.82	62.2	59.62	88.7584				3.79333	6.37333	6.06161
1	0.9	0.85	High	185	3	O2	2	64.885	64.885	94.8967	61.3	58.9	87.494	0.704869	0.874328	0.323334	3.585	5.985	7.40267
1	0.9	0.85	High	185	3	O2	2	64.885	64.885	94.8967	61.34	60.08	87.6097				3.545	4.805	7.28694
1	0.9	0.85	High	185	3	O2	2	64.885	64.885	94.8967	60.84	59.92	87.7153				4.045	4.965	7.18134
1	0.9	0.85	High	185	3	O2	2	64.885	64.885	94.8967	61.56	59.78	87.8243				3.325	5.105	7.07241
1	0.9	0.85	High	185	3	O2	2	64.885	64.885	94.8967	59.38	60.26	87.9244				5.505	4.625	6.97223
1	0.9	0.85	High	185	3	O2	2	64.885	64.885	94.8967	61.92	59.44	88.0348				2.965	5.445	6.86192
1	0.9	0.85	High	185	3	O2	2	64.885	64.885	94.8967	61.58	57.3	88.1404				3.305	7.585	6.75628
1	0.9	0.85	High	185	3	O2	2	64.885	64.885	94.8967	61.54	58.8	88.2524				3.345	6.085	6.64423
1	0.9	0.85	High	185	3	O2	2	64.885	64.885	94.8967	61.1	58.78	88.3568				3.785	6.105	6.53986
1	0.9	0.85	High	185	3	O2	2	64.885	64.885	94.8967	60.86	59	88.4546				4.025	5.885	6.44202
1	0.9	0.85	High	185	3	O2	3	63.6867	63.6867	94.8967	60.44	52.9	88.1842	1.33813	1.7003	0.360321	3.24667	10.7867	6.71251
1	0.9	0.85	High	185	3	O2	3	63.6867	63.6867	94.8967	60.88	51.86	88.3063				2.80667	11.8267	6.59037
1	0.9	0.85	High	185	3	O2	3	63.6867	63.6867	94.8967	58.1	54.04	88.4113				5.58667	9.64667	6.48534
1	0.9	0.85	High	185	3	O2	3	63.6867	63.6867	94.8967	58.96	50.52	88.5245				4.72667	13.1667	6.37215
1	0.9	0.85	High	185	3	O2	3	63.6867	63.6867	94.8967	56.1	52.98	88.6609				7.58667	10.7067	6.23579
1	0.9	0.85	High	185	3	O2	3	63.6867	63.6867	94.8967	59.88	50.2	88.7909				3.80667	13.4867	6.10573
1	0.9	0.85	High	185	3	O2	3	63.6867	63.6867	94.8967	59.52	52.74	88.9093				4.16667	10.9467	5.98735
1	0.9	0.85	High	185	3	O2	3	63.6867	63.6867	94.8967	59.46	48.42	89.0143				4.22667	15.2667	5.88233
1	0.9	0.85	High	185	3	O2	3	63.6867	63.6867	94.8967	59.5	50.36	89.1189				4.18667	13.3267	5.77779
1	0.9	0.85	High	185	3	O2	3	63.6867	63.6867	94.8967	59.62	50.94	89.2554				4.06667	12.7467	5.64126
1	0.9	0.85	High	185	3	O3	1	120.858	120.858	154.833	118.3	116.1	144.879	1.20134	0.959224	0.343674	2.5575	4.7575	9.95438
1	0.9	0.85	High	185	3	O3	1	120.858	120.858	154.833	117.7	118.9	144.879				3.1575	1.9575	9.95438
1	0.9	0.85	High	185	3	O3	1	120.858	120.858	154.833	118	118.2	145.025				2.8575	2.6575	9.80842
1	0.9	0.85	High	185	3	O3	1	120.858	120.858	154.833	117.8	116.9	145.118				3.0575	3.9575	9.71537
1	0.9	0.85	High	185	3	O3	1	120.858	120.858	154.833	117.4	116.6	145.254				3.4575	4.2575	9.57962
1	0.9	0.85	High	185	3	O3	1	120.858	120.858	154.833	115.4	117.7	145.348				5.4575	3.1575	9.48538
1	0.9	0.85	High	185	3	O3	1	120.858	120.858	154.833	118.2	118.5	145.473				2.6575	2.3575	9.36064
1	0.9	0.85	High	185	3	O3	1	120.858	120.858	154.833	115	116.8	145.595				5.8575	4.0575	9.23835
1	0.9	0.85	High	185	3	O3	1	120.858	120.858	154.833	118.4	118.6	145.739				2.4575	2.2575	9.09473
1	0.9	0.85	High	185	3	O3	1	120.858	120.858	154.833	116.9	117.4	145.837				3.9575	3.4575	8.99659
1	0.9	0.85	High	185	3	O3	2	119.83	119.83	155.667	115.7	116.7	146.28	0.751369	0.739369	0.531265	4.13	3.13	9.38697
1	0.9	0.85	High	185	3	O3	2	119.83	119.83	155.667	117.6	116.2	146.425				2.23	3.63	9.24176
1	0.9	0.85	High	185	3	O3	2	119.83	119.83	155.667	115.3	115.9	146.617				4.53	3.93	9.04963
1	0.9	0.85	High	185	3	O3	2	119.83	119.83	155.667	114.9	117.2	146.814				4.93	2.63	8.85249
1	0.9	0.85	High	185	3	O3	2	119.83	119.83	155.667	115.8	115.8	146.972				4.03	4.03	8.69512
1	0.9	0.85	High	185	3	O3	2	119.83	119.83	155.667	115.3	116.7	147.14				4.53	3.13	8.52643
1	0.9	0.85	High	185	3	O3	2	119.83	119.83	155.667	116.2	114.8	147.339				3.63	5.03	8.32719
1	0.9	0.85	High	185	3	O3	2	119.83	119.83	155.667	115.4	117	147.49				4.43	2.83	8.1768
1	0.9	0.85	High	185	3	O3	2	119.83	119.83	155.667	115.3	117.1	147.671				4.53	2.73	7.99587
1	0.9	0.85	High	185	3	O3	2	119.83	119.83	155.667	115.8	116.6	147.848				4.03	3.23	7.81857
1	0.9	0.85	High	185	3	O3	3	121.557	121.557	154.25	118	116.3	144.896	0.518652	1.41673	0.435191	3.55667	5.25667	9.35424
1	0.9	0.85	High	185	3	O3	3	121.557	121.557	154.25	118.7	112	145.062				2.85667	9.55667	9.1881
1	0.9	0.85	High	185	3	O3	3	121.557	121.557	154.25	118.8	116.3	145.18				2.75667	5.25667	9.07004
1	0.9	0.85	High	185	3	O3	3	121.557	121.557	154.25	117.5	116.4	145.318				4.05667	5.15667	8.93152
1	0.9	0.85	High	185	3	O3	3	121.557	121.557	154.25	117.7	116.6	145.504				3.85667	4.95667	8.74552
1	0.9	0.85	High	185	3	O3	3	121.557	121.557	154.25	118.9	116.6	145.616				2.65667	4.95667	8.63426
1	0.9	0.85	High	185	3	O3	3	121.557	121.557	154.25	117.7	116.2	145.761				3.85667	5.35667	8.4894
1	0.9	0.85	High	185	3	O3	3	121.557	121.557	154.25	118.3	116.5	145.916				3.25667	5.05667	8.3343
1	0.9	0.85	High	185	3	O3	3	121.557	121.557	154.25	117.7	115.1	146.041				3.85667	6.45667	8.20858
1	0.9	0.85	High	185	3	O3	3	121.557	121.557	154.25	118.4	116.4	146.199				3.15667	5.15667	8.05057
1	0.9	0.75	High	111	6	O1	1	98.14	72.7333	47.4933	96.5333	62.8667	40.8349	0.424279	3.96556	0.982889	1.60667	9.86667	6.65842
1	0.9	0.75	High	111	6	O1	1	98.14	72.7333	47.4933	95.9667	67.7	41.1635				2.17333	5.03333	6.32987
1	0.9	0.75	High	111	6	O1	1	98.14	72.7333	47.4933	95.9333	69.4333	41.4858				2.20667	3.3	6.00754
1	0.9	0.75	High	111	6	O1	1	98.14	72.7333	47.4933	96.3	58.6333	41.7948				1.84	14.1	5.69848
1	0.9	0.75	High	111	6	O1	1	98.14	72.7333	47.4933	96.9667	64.0333	42.1171				1.17333	8.7	5.37627
1	0.9	0.75	High	111	6	O1	1	98.14	72.7333	47.4933	95.6333	68.1	42.4398				2.50667	4.63333	5.05358
1	0.9	0.75	High	111	6	O1	1	98.14	72.7333	47.4933	95.6333	69.5667	42.7776				2.50667	3.16667	4.71571
1	0.9	0.75	High	111	6	O1	1	98.14	72.7333	47.4933	95.9	69.1	43.0767				2.24	3.63333	4.41659
1	0.9	0.75	High	111	6	O1	1	98.14	72.7333	47.4933	95.9333	62.4667	43.4238				2.20667	10.2667	4.06957
1	0.9	0.75	High	111	6	O1	1	98.14	72.7333	47.4933	95.7667	70.5	43.7806				2.37333	2.23333	3.71275
1	0.9	0.75	High	111	6	O1	2	98.2033	72.8067	47.03	95.4667	69.9333	43.2852	0.594637	3.01271	0.890425	2.73667	2.87333	3.74484
1	0.9	0.75	High	111	6	O1	2	98.2033	72.8067	47.03	94.7667	66.5	43.5545				3.43667	6.30667	3.47546
1	0.9	0.75	High	111	6	O1	2	98.2033	72.8067	47.03	95.2	62.4333	43.8593				3.00333	10.3733	3.17067
1	0.9	0.75	High	111	6	O1	2	98.2033	72.8067	47.03	94.5333	70.3	44.1627				3.67	2.50667	2.86728
1	0.9	0.75	High	111	6	O1	2	98.2033	72.8067	47.03	95.1	70.9333	44.4347				3.10333	1.87333	2.5953
1	0.9	0.75	High	111	6	O1	2	98.2033	72.8067	47.03	95.0333	71.9333	44.7295				3.17	0.873333	2.30052
1	0.9	0.75	High	111	6	O1	2	98.2033	72.8067	47.03	95.1333	65.6333	45.0289				3.07	7.17333	2.00109
1	0.9	0.75	High	111	6	O1	2	98.2033	72.8067	47.03	93.7667	69.5667	45.3134				4.43667	3.24	1.71661
1	0.9	0.75	High	111	6	O1	2	98.2033	72.8067	47.03	93.7	65.6333	45.6247				4.50333	7.17333	1.40531
1	0.9	0.75	High	111	6	O1	2	98.2033	72.8067	47.03	94.7333	69.5	45.937				3.47	3.30667	1.09297
1	0.9	0.75	High	111	6	O1	3	98.1133	72.7433	46.27	97.3667	68.2333	43.3992	0.573015	2.24522	1.07739	0.746667	4.51	2.87083
1	0.9	0.75	High	111	6	O1	3	98.1133	72.7433	46.27	96.3667	73.5667	43.7606				1.74667	0.823333	2.50938
1	0.9	0.75	High	111	6	O1	3	98.1133	72.7433	46.27	96.5	70.0667	44.0784				1.61333	2.67667	2.19159
1	0.9	0.75	High	111	6	O1	3	98.1133	72.7433	46.27	96.5667	68.3667	44.4381				1.54667	4.37667	1.83187
1	0.9	0.75	High	111	6	O1	3	98.1133	72.7433	46.27	95.9667	71.7667	44.8018				2.14667	0.976667	1.46823
1	0.9	0.75	High	111	6	O1	3	98.1133	72.7433	46.27	95.7333	71.5333	45.1497				2.38	1.21	1.12033
1	0.9	0.75	High	111	6	O1	3	98.1133	72.7433	46.27	96.1	72	45.5421				2.01333	0.743333	0.727938
1	0.9	0.75	High	111	6	O1	3	98.1133	72.7433	46.27	95.6667	72.6	45.9076				2.44667	0.143333	0.362391
1	0.9	0.75	High	111	6	O1	3	98.1133	72.7433	46.27	96	71.0333	46.2055				2.11333	1.71	0.0644554
1	0.9	0.75	High	111	6	O1	3	98.1133	72.7433	46.27	95.3333	75.6	46.5975				2.78	2.85667	0.327484
1	0.9	0.75	High	111	6	O2	1	65.9933	65.9933	94.82	61.8	60.5333	87.539	0.249351	0.68211	0.455618	4.19333	5.46	7.28095
1	0.9	0.75	High	111	6	O2	1	65.9933	65.9933	94.82	61.7833	59.8167	87.6899				4.21	6.17667	7.13007
1	0.9	0.75	High	111	6	O2	1	65.9933	65.9933	94.82	61.9667	60.1167	87.8448				4.02667	5.87667	6.9752
1	0.9	0.75	High	111	6	O2	1	65.9933	65.9933	94.82	61.45	58.25	87.9923				4.54333	7.74333	6.82766
1	0.9	0.75	High	111	6	O2	1	65.9933	65.9933	94.82	62.3667	60.3833	88.1447				3.62667	5.61	6.6753
1	0.9	0.75	High	111	6	O2	1	65.9933	65.9933	94.82	61.7667	60.15	88.2975				4.22667	5.84333	6.52249
1	0.9	0.75	High	111	6	O2	1	65.9933	65.9933	94.82	62.1333	59.9	88.4428				3.86	6.09333	6.37718
1	0.9	0.75	High	111	6	O2	1	65.9933	65.9933	94.82	62.05	59.35	88.5979				3.94333	6.64333	6.22213
1	0.9	0.75	High	111	6	O2	1	65.9933	65.9933	94.82	62.05	59.7333	88.7441				3.94333	6.26	6.07587
1	0.9	0.75	High	111	6	O2	1	65.9933	65.9933	94.82	61.8833	59.0833	88.8925				4.11	6.91	5.92753
1	0.9	0.75	High	111	6	O2	2	64.885	64.885	94.8967	60.45	60.7333	86.8102	0.849882	1.04699	0.659354	4.435	4.15167	8.08643
1	0.9	0.75	High	111	6	O2	2	64.885	64.885	94.8967	60.2333	62.6333	87.0367				4.65167	2.25167	7.85999
1	0.9	0.75	High	111	6	O2	2	64.885	64.885	94.8967	59.5667	60.4333	87.2575				5.31833	4.45167	7.63919
1	0.9	0.75	High	111	6	O2	2	64.885	64.885	94.8967	59.5667	59.7833	87.4693				5.31833	5.10167	7.4274
1	0.9	0.75	High	111	6	O2	2	64.885	64.885	94.8967	60.35	59.5833	87.6874				4.535	5.30167	7.20922
1	0.9	0.75	High	111	6	O2	2	64.885	64.885	94.8967	58.6167	60.15	87.9141				6.26833	4.735	6.98255
1	0.9	0.75	High	111	6	O2	2	64.885	64.885	94.8967	59.0167	60.95	88.1337				5.86833	3.935	6.763
1	0.9	0.75	High	111	6	O2	2	64.885	64.885	94.8967	60.5167	61.2	88.3437				4.36833	3.685	6.55295
1	0.9	0.75	High	111	6	O2	2	64.885	64.885	94.8967	60.4333	59.6833	88.5492				4.45167	5.20167	6.34749
1	0.9	0.75	High	111	6	O2	2	64.885	64.885	94.8967	58.1667	58.9167	88.7761				6.71833	5.96833	6.12052
1	0.9	0.75	High	111	6	O2	3	63.6867	63.6867	94.8967	60.5	49.2	88.8011	1.49159	2.45749	1.15565	3.18667	14.4867	6.09553
1	0.9	0.75	High	111	6	O2	3	63.6867	63.6867	94.8967	60.2333	50.35	89.1521				3.45333	13.3367	5.74458
1	0.9	0.75	High	111	6	O2	3	63.6867	63.6867	94.8967	59.4333	50.6833	89.5312				4.25333	13.0033	5.36543
1	0.9	0.75	High	111	6	O2	3	63.6867	63.6867	94.8967	58.2833	50.4667	89.9036				5.40333	13.22	4.99304
1	0.9	0.75	High	111	6	O2	3	63.6867	63.6867	94.8967	58.5167	49.1833	90.2995				5.17	14.5033	4.59719
1	0.9	0.75	High	111	6	O2	3	63.6867	63.6867	94.8967	58.8	49.2667	90.6507				4.88667	14.42	4.24597
1	0.9	0.75	High	111	6	O2	3	63.6867	63.6867	94.8967	55.3	47.3833	91.0458				8.38667	16.3033	3.85084
1	0.9	0.75	High	111	6	O2	3	63.6867	63.6867	94.8967	59.5167	51.8833	91.4578				4.17	11.8033	3.43885
1	0.9	0.75	High	111	6	O2	3	63.6867	63.6867	94.8967	58.3	47.7667	91.85				5.38667	15.92	3.04665
1	0.9	0.75	High	111	6	O2	3	63.6867	63.6867	94.8967	57.55	43.0833	92.2096				6.13667	20.6033	2.68708
1	0.9	0.75	High	111	6	O3	1	120.858	120.858	154.833	117.4	117.6	145.576	0.670738	6.69789	0.475256	3.4575	3.2575	9.25718
1	0.9	0.75	High	111	6	O3	1	120.858	120.858	154.833	117.1	115.7	145.717				3.7575	5.1575	9.11679
1	0.9	0.75	High	111	6	O3	1	120.858	120.858	154.833	117.2	118.5	145.873				3.6575	2.3575	8.96035
1	0.9	0.75	High	111	6	O3	1	120.858	120.858	154.833	118.3	96.9	146.017				2.5575	23.9575	8.81647
1	0.9	0.75	High	111	6	O3	1	120.858	120.858	154.833	118.3	119.2	146.156				2.5575	1.6575	8.67732
1	0.9	0.75	High	111	6	O3	1	120.858	120.858	154.833	117.5	118.5	146.331				3.3575	2.3575	8.50214
1	0.9	0.75	High	111	6	O3	1	120.858	120.858	154.833	116.9	115.1	146.465				3.9575	5.7575	8.36832
1	0.9	0.75	High	111	6	O3	1	120.858	120.858	154.833	118.6	110.9	146.667				2.2575	9.9575	8.16614
1	0.9	0.75	High	111	6	O3	1	120.858	120.858	154.833	117.8	116.4	146.817				3.0575	4.4575	8.01653
1	0.9	0.75	High	111	6	O3	1	120.858	120.858	154.833	118.8	118	146.986				2.0575	2.8575	7.84725
1	0.9	0.75	High	111	6	O3	2	119.83	119.83	155.667	118.9	115.5	145.756	1.27819	2.32926	0.70911	0.93	4.33	9.91045
1	0.9	0.75	High	111	6	O3	2	119.83	119.83	155.667	118.1	114.4	145.992				1.73	5.43	9.67471
1	0.9	0.75	High	111	6	O3	2	119.83	119.83	155.667	117.6	117	146.221				2.23	2.83	9.44566
1	0.9	0.75	High	111	6	O3	2	119.83	119.83	155.667	116.6	109.2	146.434				3.23	10.63	9.23247
1	0.9	0.75	High	111	6	O3	2	119.83	119.83	155.667	116.9	117.1	146.674				2.93	2.73	8.99255
1	0.9	0.75	High	111	6	O3	2	119.83	119.83	155.667	115.1	116.3	146.92				4.73	3.53	8.74676
1	0.9	0.75	High	111	6	O3	2	119.83	119.83	155.667	117.5	116	147.137				2.33	3.83	8.52947
1	0.9	0.75	High	111	6	O3	2	119.83	119.83	155.667	116.4	115.6	147.365				3.43	4.23	8.30198
1	0.9	0.75	High	111	6	O3	2	119.83	119.83	155.667	116.8	117	147.628				3.03	2.83	8.03859
1	0.9	0.75	High	111	6	O3	2	119.83	119.83	155.667	114.7	115.8	147.88				5.13	4.03	7.78706
1	0.9	0.75	High	111	6	O3	3	121.557	121.557	154.25	118.2	97.7	145.756	2.22613	7.41222	0.301818	3.35667	23.8567	8.4941
1	0.9	0.75	High	111	6	O3	3	121.557	121.557	154.25	118.9	91.9	145.903				2.65667	29.6567	8.34669
1	0.9	0.75	High	111	6	O3	3	121.557	121.557	154.25	117.8	103.8	145.955				3.75667	17.7567	8.29503
1	0.9	0.75	High	111	6	O3	3	121.557	121.557	154.25	118.3	105.2	146.096				3.25667	16.3567	8.15372
1	0.9	0.75	High	111	6	O3	3	121.557	121.557	154.25	111.6	113.1	146.161				9.95667	8.45667	8.08942
1	0.9	0.75	High	111	6	O3	3	121.557	121.557	154.25	118.5	108.1	146.292				3.05667	13.4567	7.95798
1	0.9	0.75	High	111	6	O3	3	121.557	121.557	154.25	115.7	115	146.356				5.85667	6.55667	7.89366
1	0.9	0.75	High	111	6	O3	3	121.557	121.557	154.25	118.1	110.9	146.495				3.45667	10.6567	7.75491
1	0.9	0.75	High	111	6	O3	3	121.557	121.557	154.25	115.6	113.9	146.563				5.95667	7.65667	7.68728
1	0.9	0.75	High	111	6	O3	3	121.557	121.557	154.25	118	108.3	146.665				3.55667	13.2567	7.58462
1	0.8	0.95	High	278	2	O1	1	98.14	72.7333	47.4933	96	73.2333	40.1521	0.249469	1.0922	1.66217	2.14	0.5	7.34127
1	0.8	0.95	High	278	2	O1	1	98.14	72.7333	47.4933	95.8333	72.9	40.6649				2.30667	0.166667	6.82843
1	0.8	0.95	High	278	2	O1	1	98.14	72.7333	47.4933	96.0333	72.6667	41.1989				2.10667	0.0666667	6.29444
1	0.8	0.95	High	278	2	O1	1	98.14	72.7333	47.4933	95.4667	72.5	41.7521				2.67333	0.233333	5.74119
1	0.8	0.95	High	278	2	O1	1	98.14	72.7333	47.4933	96.4	71.9667	42.3223				1.74	0.766667	5.17102
1	0.8	0.95	High	278	2	O1	1	98.14	72.7333	47.4933	96.2	72.5333	42.8397				1.94	0.2	4.65368
1	0.8	0.95	High	278	2	O1	1	98.14	72.7333	47.4933	95.9	73.3667	43.3981				2.24	0.633333	4.09524
1	0.8	0.95	High	278	2	O1	1	98.14	72.7333	47.4933	95.9	72.8	43.9191				2.24	0.0666667	3.57426
1	0.8	0.95	High	278	2	O1	1	98.14	72.7333	47.4933	96	69.6	44.483				2.14	3.13333	3.01031
1	0.8	0.95	High	278	2	O1	1	98.14	72.7333	47.4933	96.1667	71.6	45.128				1.97333	1.13333	2.3653
1	0.8	0.95	High	278	2	O1	2	98.2033	72.8067	47.03	95.1	72.5333	41.5072	0.143329	2.09262	1.36907	3.10333	0.273333	5.5228
1	0.8	0.95	High	278	2	O1	2	98.2033	72.8067	47.03	95	69.2	41.9015				3.20333	3.60667	5.12854
1	0.8	0.95	High	278	2	O1	2	98.2033	72.8067	47.03	94.9667	71.2333	42.3998				3.23667	1.57333	4.63023
1	0.8	0.95	High	278	2	O1	2	98.2033	72.8067	47.03	95	73.7667	42.8517				3.20333	0.96	4.1783
1	0.8	0.95	High	278	2	O1	2	98.2033	72.8067	47.03	95	72.7667	43.295				3.20333	0.04	3.73505
1	0.8	0.95	High	278	2	O1	2	98.2033	72.8067	47.03	94.7667	71.3333	43.682				3.43667	1.47333	3.34801
1	0.8	0.95	High	278	2	O1	2	98.2033	72.8067	47.03	94.9667	74.2667	44.1771				3.23667	1.46	2.85294
1	0.8	0.95	High	278	2	O1	2	98.2033	72.8067	47.03	94.6333	68.9667	44.6268				3.57	3.84	2.40323
1	0.8	0.95	High	278	2	O1	2	98.2033	72.8067	47.03	94.9333	72.2667	45.1026				3.27	0.54	1.92742
1	0.8	0.95	High	278	2	O1	2	98.2033	72.8067	47.03	94.7667	75.5333	45.5838				3.43667	2.72667	1.44624
1	0.8	0.95	High	278	2	O1	3	98.1133	72.7433	46.27	96.0667	72.3	40.7235	0.226078	1.76252	1.21194	2.04667	0.443333	5.54645
1	0.8	0.95	High	278	2	O1	3	98.1133	72.7433	46.27	95.7667	74.5	41.3209				2.34667	1.75667	4.94911
1	0.8	0.95	High	278	2	O1	3	98.1133	72.7433	46.27	95.6667	74.1	41.6739				2.44667	1.35667	4.59609
1	0.8	0.95	High	278	2	O1	3	98.1133	72.7433	46.27	96.3667	71.3	42.0953				1.74667	1.44333	4.17475
1	0.8	0.95	High	278	2	O1	3	98.1133	72.7433	46.27	95.7333	75.3667	42.5247				2.38	2.62333	3.74531
1	0.8	0.95	High	278	2	O1	3	98.1133	72.7433	46.27	95.8667	75.1333	42.9234				2.24667	2.39	3.34663
1	0.8	0.95	High	278	2	O1	3	98.1133	72.7433	46.27	95.7667	75.2	43.2659				2.34667	2.45667	3.0041
1	0.8	0.95	High	278	2	O1	3	98.1133	72.7433	46.27	96.1333	71.0333	43.6678				1.98	1.71	2.60215
1	0.8	0.95	High	278	2	O1	3	98.1133	72.7433	46.27	95.7	75.5333	44.0118				2.41333	2.79	2.25825
1	0.8	0.95	High	278	2	O1	3	98.1133	72.7433	46.27	95.9333	75.3333	44.417				2.18	2.59	1.85301
1	0.8	0.95	High	278	2	O2	1	65.9933	65.9933	94.82	62.58	65.54	89.6859	0.160069	0.884506	0.239606	3.41333	0.453333	5.13408
1	0.8	0.95	High	278	2	O2	1	65.9933	65.9933	94.82	62.7	64.18	89.772				3.29333	1.81333	5.04796
1	0.8	0.95	High	278	2	O2	1	65.9933	65.9933	94.82	62.54	64.44	89.8541				3.45333	1.55333	4.96595
1	0.8	0.95	High	278	2	O2	1	65.9933	65.9933	94.82	62.72	62.78	89.9341				3.27333	3.21333	4.88591
1	0.8	0.95	High	278	2	O2	1	65.9933	65.9933	94.82	63.02	63.86	90.0074				2.97333	2.13333	4.81256
1	0.8	0.95	High	278	2	O2	1	65.9933	65.9933	94.82	62.7	64.56	90.0894				3.29333	1.43333	4.73062
1	0.8	0.95	High	278	2	O2	1	65.9933	65.9933	94.82	62.94	64.82	90.169				3.05333	1.17333	4.65096
1	0.8	0.95	High	278	2	O2	1	65.9933	65.9933	94.82	62.54	63.94	90.247				3.45333	2.05333	4.57302
1	0.8	0.95	High	278	2	O2	1	65.9933	65.9933	94.82	62.8	63.86	90.3221				3.19333	2.13333	4.4979
1	0.8	0.95	High	278	2	O2	1	65.9933	65.9933	94.82	62.76	65.84	90.4031				3.23333	0.153333	4.41685
1	0.8	0.95	High	278	2	O2	2	64.885	64.885	94.8967	60.78	62.52	90.4283	0.313149	0.821641	0.21917	4.105	2.365	4.46834
1	0.8	0.95	High	278	2	O2	2	64.885	64.885	94.8967	60.14	62.24	90.4952				4.745	2.645	4.40145
1	0.8	0.95	High	278	2	O2	2	64.885	64.885	94.8967	60.8	62.68	90.5678				4.085	2.205	4.32888
1	0.8	0.95	High	278	2	O2	2	64.885	64.885	94.8967	60.94	60.88	90.6442				3.945	4.005	4.25251
1	0.8	0.95	High	278	2	O2	2	64.885	64.885	94.8967	60.9	61.38	90.7162				3.985	3.505	4.18046
1	0.8	0.95	High	278	2	O2	2	64.885	64.885	94.8967	61.24	60.06	90.7858				3.645	4.825	4.1109
1	0.8	0.95	High	278	2	O2	2	64.885	64.885	94.8967	60.8	61.1	90.8578				4.085	3.785	4.03886
1	0.8	0.95	High	278	2	O2	2	64.885	64.885	94.8967	61.04	61.56	90.9345				3.845	3.325	3.96212
1	0.8	0.95	High	278	2	O2	2	64.885	64.885	94.8967	61.26	61.4	91.006				3.625	3.485	3.8907
1	0.8	0.95	High	278	2	O2	2	64.885	64.885	94.8967	60.78	60.82	91.0755				4.105	4.065	3.82121
1	0.8	0.95	High	278	2	O2	3	63.6867	63.6867	94.8967	61.85	60.8833	91.4948	0.318876	1.43242	0.265339	1.83667	2.80333	3.40192
1	0.8	0.95	High	278	2	O2	3	63.6867	63.6867	94.8967	61.9833	58.45	91.5947				1.70333	5.23667	3.30198
1	0.8	0.95	High	278	2	O2	3	63.6867	63.6867	94.8967	61.6667	60.4167	91.6942				2.02	3.27	3.20249
1	0.8	0.95	High	278	2	O2	3	63.6867	63.6867	94.8967	61.45	59.65	91.6964				2.23667	4.03667	3.20028
1	0.8	0.95	High	278	2	O2	3	63.6867	63.6867	94.8967	62.5333	60.1333	91.7945				1.15333	3.55333	3.10212
1	0.8	0.95	High	278	2	O2	3	63.6867	63.6867	94.8967	61.6	59.6167	91.8944				2.08667	4.07	3.00229
1	0.8	0.95	High	278	2	O2	3	63.6867	63.6867	94.8967	61.6333	57.1667	91.9942				2.05333	6.52	2.90249
1	0.8	0.95	High	278	2	O2	3	63.6867	63.6867	94.8967	62.05	57.9167	92.0941				1.63667	5.77	2.80259
1	0.8	0.95	High	278	2	O2	3	63.6867	63.6867	94.8967	61.6167	57.8333	92.1941				2.07	5.85333	2.7026
1	0.8	0.95	High	278	2	O2	3	63.6867	63.6867	94.8967	62.0333	61.4167	92.2934				1.65333	2.27	2.6033
1	0.8	0.95	High	278	2	O3	1	120.858	120.858	154.833	110.5	125.8	150.171	6.00767	0.475628	0.355319	10.3575	4.9425	4.66266
1	0.8	0.95	High	278	2	O3	1	120.858	120.858	154.833	99.6	125.9	150.271				21.2575	5.0425	4.56271
1	0.8	0.95	High	278	2	O3	1	120.858	120.858	154.833	117.1	126	150.371				3.7575	5.1425	4.46272
1	0.8	0.95	High	278	2	O3	1	120.858	120.858	154.833	116.8	125.9	150.507				4.0575	5.0425	4.32637
1	0.8	0.95	High	278	2	O3	1	120.858	120.858	154.833	108	125.5	150.671				12.8575	4.6425	4.16276
1	0.8	0.95	High	278	2	O3	1	120.858	120.858	154.833	116.9	124.7	150.771				3.9575	3.8425	4.0627
1	0.8	0.95	High	278	2	O3	1	120.858	120.858	154.833	117.5	125.7	150.871				3.3575	4.8425	3.96276
1	0.8	0.95	High	278	2	O3	1	120.858	120.858	154.833	117.1	125.3	150.971				3.7575	4.4425	3.86279
1	0.8	0.95	High	278	2	O3	1	120.858	120.858	154.833	117.1	124.9	151.071				3.7575	4.0425	3.7628
1	0.8	0.95	High	278	2	O3	1	120.858	120.858	154.833	117.5	126.1	151.231				3.3575	5.2425	3.6028
1	0.8	0.95	High	278	2	O3	2	119.83	119.83	155.667	115.5	124.8	151.381	2.95101	0.671648	0.255693	4.33	4.97	4.28527
1	0.8	0.95	High	278	2	O3	2	119.83	119.83	155.667	115.3	125.3	151.476				4.53	5.47	4.19025
1	0.8	0.95	High	278	2	O3	2	119.83	119.83	155.667	110.7	125.2	151.575				9.13	5.37	4.09189
1	0.8	0.95	High	278	2	O3	2	119.83	119.83	155.667	106.8	125	151.671				13.03	5.17	3.99517
1	0.8	0.95	High	278	2	O3	2	119.83	119.83	155.667	115.4	125.3	151.755				4.43	5.47	3.91169
1	0.8	0.95	High	278	2	O3	2	119.83	119.83	155.667	113.1	125.1	151.798				6.73	5.27	3.86897
1	0.8	0.95	High	278	2	O3	2	119.83	119.83	155.667	115.7	125.5	151.887				4.13	5.67	3.77996
1	0.8	0.95	High	278	2	O3	2	119.83	119.83	155.667	112.9	123.5	151.99				6.93	3.67	3.67652
1	0.8	0.95	High	278	2	O3	2	119.83	119.83	155.667	115.5	124.5	152.083				4.33	4.67	3.58402
1	0.8	0.95	High	278	2	O3	2	119.83	119.83	155.667	115.9	123.8	152.148				3.93	3.97	3.51854
1	0.8	0.95	High	278	2	O3	3	121.557	121.557	154.25	117.1	124.2	149.955	0.777532	0.817924	0.360982	4.45667	2.64333	4.29514
1	0.8	0.95	High	278	2	O3	3	121.557	121.557	154.25	117.3	121.8	150.067				4.25667	0.243333	4.18349
1	0.8	0.95	High	278	2	O3	3	121.557	121.557	154.25	117.5	123.8	150.198				4.05667	2.24333	4.05178
1	0.8	0.95	High	278	2	O3	3	121.557	121.557	154.25	115.4	123.7	150.315				6.15667	2.14333	3.93467
1	0.8	0.95	High	278	2	O3	3	121.557	121.557	154.25	117.6	124	150.428				3.95667	2.44333	3.82178
1	0.8	0.95	High	278	2	O3	3	121.557	121.557	154.25	116.4	123.3	150.541				5.15667	1.74333	3.70933
1	0.8	0.95	High	278	2	O3	3	121.557	121.557	154.25	117.2	124.4	150.662				4.35667	2.84333	3.58781
1	0.8	0.95	High	278	2	O3	3	121.557	121.557	154.25	115.6	123.8	150.782				5.95667	2.24333	3.46755
1	0.8	0.95	High	278	2	O3	3	121.557	121.557	154.25	117.3	123.8	150.896				4.25667	2.24333	3.35379
1	0.8	0.95	High	278	2	O3	3	121.557	121.557	154.25	116.9	124.9	151.042				4.65667	3.34333	3.20786
1	0.8	0.85	High	93	7	O1	1	98.14	72.7333	47.4933	99.3	61.7333	40.7849	0.951568	3.13861	3.09655	1.16	11	6.70845
1	0.8	0.85	High	93	7	O1	1	98.14	72.7333	47.4933	96.4333	71.7667	41.8086				1.70667	0.966667	5.68469
1	0.8	0.85	High	93	7	O1	1	98.14	72.7333	47.4933	97.9667	71.2333	42.8514				0.173333	1.5	4.64197
1	0.8	0.85	High	93	7	O1	1	98.14	72.7333	47.4933	96.9	67.1667	43.8408				1.24	5.56667	3.65255
1	0.8	0.85	High	93	7	O1	1	98.14	72.7333	47.4933	98.1	68.0667	44.8287				0.04	4.66667	2.66465
1	0.8	0.85	High	93	7	O1	1	98.14	72.7333	47.4933	98.3333	73.1667	45.8286				0.193333	0.433333	1.66472
1	0.8	0.85	High	93	7	O1	1	98.14	72.7333	47.4933	98.3667	68.8	46.8249				0.226667	3.93333	0.668417
1	0.8	0.85	High	93	7	O1	1	98.14	72.7333	47.4933	99.0667	68.8	47.9013				0.926667	3.93333	0.407953
1	0.8	0.85	High	93	7	O1	1	98.14	72.7333	47.4933	98.9333	70.2333	48.9778				0.793333	2.5	1.48444
1	0.8	0.85	High	93	7	O1	1	98.14	72.7333	47.4933	99.0667	69.1333	50.046				0.926667	3.6	2.5527
1	0.8	0.85	High	93	7	O1	2	98.2033	72.8067	47.03	99.0333	66.8	40.2644	0.684042	1.98347	2.76101	0.83	6.00667	6.76558
1	0.8	0.85	High	93	7	O1	2	98.2033	72.8067	47.03	99.6333	71.9667	41.1441				1.43	0.84	5.88592
1	0.8	0.85	High	93	7	O1	2	98.2033	72.8067	47.03	98.7	67.7667	42.1367				0.496667	5.04	4.89335
1	0.8	0.85	High	93	7	O1	2	98.2033	72.8067	47.03	98.8333	70.5	43.0972				0.63	2.30667	3.93277
1	0.8	0.85	High	93	7	O1	2	98.2033	72.8067	47.03	98.4	72.6333	44.0179				0.196667	0.173333	3.01205
1	0.8	0.85	High	93	7	O1	2	98.2033	72.8067	47.03	98.1667	71.0667	44.9206				0.0366667	1.74	2.10945
1	0.8	0.85	High	93	7	O1	2	98.2033	72.8067	47.03	99.9667	71.1	45.7779				1.76333	1.70667	1.25209
1	0.8	0.85	High	93	7	O1	2	98.2033	72.8067	47.03	98.8667	70.4	46.6229				0.663333	2.40667	0.407146
1	0.8	0.85	High	93	7	O1	2	98.2033	72.8067	47.03	100.333	71.2	47.57				2.13	1.60667	0.539978
1	0.8	0.85	High	93	7	O1	2	98.2033	72.8067	47.03	99.1667	73.0667	48.4963				0.963333	0.26	1.46626
1	0.8	0.85	High	93	7	O1	3	98.1133	72.7433	46.27	100.033	67.5	40.2589	0.415517	2.30431	2.69272	1.92	5.24333	6.01109
1	0.8	0.85	High	93	7	O1	3	98.1133	72.7433	46.27	99.3333	73.4	41.0753				1.22	0.656667	5.19472
1	0.8	0.85	High	93	7	O1	3	98.1133	72.7433	46.27	100.533	73.3667	42.0818				2.42	0.623333	4.18822
1	0.8	0.85	High	93	7	O1	3	98.1133	72.7433	46.27	99.6	73.1	43.0755				1.48667	0.356667	3.19445
1	0.8	0.85	High	93	7	O1	3	98.1133	72.7433	46.27	99.4333	73.3667	43.9452				1.32	0.623333	2.32476
1	0.8	0.85	High	93	7	O1	3	98.1133	72.7433	46.27	100.033	68.4333	44.7179				1.92	4.31	1.55208
1	0.8	0.85	High	93	7	O1	3	98.1133	72.7433	46.27	100.267	74.2	45.5544				2.15333	1.45667	0.715635
1	0.8	0.85	High	93	7	O1	3	98.1133	72.7433	46.27	99.9333	70.9667	46.446				1.82	1.77667	0.175996
1	0.8	0.85	High	93	7	O1	3	98.1133	72.7433	46.27	99.3	73.2333	47.4595				1.18667	0.49	1.18951
1	0.8	0.85	High	93	7	O1	3	98.1133	72.7433	46.27	100.033	72.7	48.2557				1.92	0.0433333	1.98572
1	0.8	0.85	High	93	7	O2	1	65.9933	65.9933	94.82	62.9167	55.75	88.2441	2.34578	1.34415	0.780901	3.07667	10.2433	6.57587
1	0.8	0.85	High	93	7	O2	1	65.9933	65.9933	94.82	62.4833	58.7167	88.4885				3.51	7.27667	6.33148
1	0.8	0.85	High	93	7	O2	1	65.9933	65.9933	94.82	61.4	57.0333	88.7561				4.59333	8.96	6.06393
1	0.8	0.85	High	93	7	O2	1	65.9933	65.9933	94.82	62.75	56.4333	89.008				3.24333	9.56	5.812
1	0.8	0.85	High	93	7	O2	1	65.9933	65.9933	94.82	62.5667	56.1	89.2619				3.42667	9.89333	5.55811
1	0.8	0.85	High	93	7	O2	1	65.9933	65.9933	94.82	63.8167	56.2167	89.5267				2.17667	9.77667	5.29326
1	0.8	0.85	High	93	7	O2	1	65.9933	65.9933	94.82	56.5	53.85	89.7806				9.49333	12.1433	5.03943
1	0.8	0.85	High	93	7	O2	1	65.9933	65.9933	94.82	64.3	55.9167	90.0576				1.69333	10.0767	4.7624
1	0.8	0.85	High	93	7	O2	1	65.9933	65.9933	94.82	63.9333	57.1667	90.3043				2.06	8.82667	4.51575
1	0.8	0.85	High	93	7	O2	1	65.9933	65.9933	94.82	64.75	58.0667	90.5503				1.24333	7.92667	4.26974
1	0.8	0.85	High	93	7	O2	2	64.885	64.885	94.8967	57.3	54.2167	88.9619	2.05949	3.60322	0.834913	7.585	10.6683	5.93479
1	0.8	0.85	High	93	7	O2	2	64.885	64.885	94.8967	59.1167	54.3167	89.2363				5.76833	10.5683	5.66035
1	0.8	0.85	High	93	7	O2	2	64.885	64.885	94.8967	58.5	55.4	89.4991				6.385	9.485	5.39759
1	0.8	0.85	High	93	7	O2	2	64.885	64.885	94.8967	54.1333	52.5167	89.7804				10.7517	12.3683	5.1163
1	0.8	0.85	High	93	7	O2	2	64.885	64.885	94.8967	58.7333	51.5833	90.0611				6.15167	13.3017	4.83558
1	0.8	0.85	High	93	7	O2	2	64.885	64.885	94.8967	54.3667	46.8667	90.3375				10.5183	18.0183	4.55917
1	0.8	0.85	High	93	7	O2	2	64.885	64.885	94.8967	58.2	48.6167	90.6055				6.685	16.2683	4.29117
1	0.8	0.85	High	93	7	O2	2	64.885	64.885	94.8967	57	46.7333	90.8903				7.885	18.1517	4.00634
1	0.8	0.85	High	93	7	O2	2	64.885	64.885	94.8967	55.9833	45.2167	91.176				8.90167	19.6683	3.72062
1	0.8	0.85	High	93	7	O2	2	64.885	64.885	94.8967	53.5833	49.8833	91.43				11.3017	15.0017	3.46668
1	0.8	0.85	High	93	7	O2	3	63.6867	63.6867	94.8967	58.15	58.5	88.9844	2.47525	3.79443	0.871738	5.53667	5.18667	5.91223
1	0.8	0.85	High	93	7	O2	3	63.6867	63.6867	94.8967	57.5833	52.0333	89.2941				6.10333	11.6533	5.60258
1	0.8	0.85	High	93	7	O2	3	63.6867	63.6867	94.8967	53.25	50.4	89.5825				10.4367	13.2867	5.31417
1	0.8	0.85	High	93	7	O2	3	63.6867	63.6867	94.8967	58.9667	48.35	89.8729				4.72	15.3367	5.02373
1	0.8	0.85	High	93	7	O2	3	63.6867	63.6867	94.8967	56.0333	48.2	90.1518				7.65333	15.4867	4.7449
1	0.8	0.85	High	93	7	O2	3	63.6867	63.6867	94.8967	55.2	47.2	90.4432				8.48667	16.4867	4.45348
1	0.8	0.85	High	93	7	O2	3	63.6867	63.6867	94.8967	54.15	47.4667	90.733				9.53667	16.22	4.16362
1	0.8	0.85	High	93	7	O2	3	63.6867	63.6867	94.8967	55.8	48.6667	91.0181				7.88667	15.02	3.87859
1	0.8	0.85	High	93	7	O2	3	63.6867	63.6867	94.8967	56.4333	47	91.2944				7.25333	16.6867	3.6023
1	0.8	0.85	High	93	7	O2	3	63.6867	63.6867	94.8967	50.6333	44.75	91.5905				13.0533	18.9367	3.30621
1	0.8	0.85	High	93	7	O3	1	120.858	120.858	154.833	104.7	121.2	149.344	6.95302	0.789092	0.403725	16.1575	0.3425	5.48927
1	0.8	0.85	High	93	7	O3	1	120.858	120.858	154.833	104.8	120.1	149.444				16.0575	0.7575	5.38893
1	0.8	0.85	High	93	7	O3	1	120.858	120.858	154.833	99.6	120.7	149.604				21.2575	0.1575	5.22976
1	0.8	0.85	High	93	7	O3	1	120.858	120.858	154.833	115.6	119.9	149.745				5.2575	0.9575	5.08877
1	0.8	0.85	High	93	7	O3	1	120.858	120.858	154.833	115.2	121.4	149.845				5.6575	0.5425	4.98839
1	0.8	0.85	High	93	7	O3	1	120.858	120.858	154.833	119.8	119.5	149.994				1.0575	1.3575	4.83981
1	0.8	0.85	High	93	7	O3	1	120.858	120.858	154.833	104.7	119.3	150.145				16.1575	1.5575	4.68806
1	0.8	0.85	High	93	7	O3	1	120.858	120.858	154.833	114.8	121.5	150.245				6.0575	0.6425	4.58818
1	0.8	0.85	High	93	7	O3	1	120.858	120.858	154.833	117.2	120	150.389				3.6575	0.8575	4.44408
1	0.8	0.85	High	93	7	O3	1	120.858	120.858	154.833	115.3	120	150.546				5.5575	0.8575	4.28767
1	0.8	0.85	High	93	7	O3	2	119.83	119.83	155.667	109.3	118.6	148.427	4.47041	3.04886	0.709516	10.53	1.23	7.24004
1	0.8	0.85	High	93	7	O3	2	119.83	119.83	155.667	112.3	118.3	148.427				7.53	1.53	7.24004
1	0.8	0.85	High	93	7	O3	2	119.83	119.83	155.667	113.7	121	148.721				6.13	1.17	6.94567
1	0.8	0.85	High	93	7	O3	2	119.83	119.83	155.667	116.7	111.6	148.923				3.13	8.23	6.74356
1	0.8	0.85	High	93	7	O3	2	119.83	119.83	155.667	109	112.6	149.205				10.83	7.23	6.46203
1	0.8	0.85	High	93	7	O3	2	119.83	119.83	155.667	104.3	117.8	149.442				15.53	2.03	6.22513
1	0.8	0.85	High	93	7	O3	2	119.83	119.83	155.667	107.4	119.5	149.67				12.43	0.33	5.99675
1	0.8	0.85	High	93	7	O3	2	119.83	119.83	155.667	117.4	119.4	149.926				2.43	0.43	5.74114
1	0.8	0.85	High	93	7	O3	2	119.83	119.83	155.667	112.9	119.2	150.14				6.93	0.63	5.52684
1	0.8	0.85	High	93	7	O3	2	119.83	119.83	155.667	117.3	118	150.429				2.53	1.83	5.2376
1	0.8	0.85	High	93	7	O3	3	121.557	121.557	154.25	120	69	149.123	6.04098	19.9116	0.33378	1.55667	52.5567	5.12676
1	0.8	0.85	High	93	7	O3	3	121.557	121.557	154.25	119.2	97.1	149.231				2.35667	24.4567	5.01878
1	0.8	0.85	High	93	7	O3	3	121.557	121.557	154.25	120.1	68	149.337				1.45667	53.5567	4.9131
1	0.8	0.85	High	93	7	O3	3	121.557	121.557	154.25	101.1	99.2	149.449				20.4567	22.3567	4.8014
1	0.8	0.85	High	93	7	O3	3	121.557	121.557	154.25	118.7	119.1	149.571				2.85667	2.45667	4.67855
1	0.8	0.85	High	93	7	O3	3	121.557	121.557	154.25	120.7	116.2	149.668				0.856667	5.35667	4.58236
1	0.8	0.85	High	93	7	O3	3	121.557	121.557	154.25	119.8	119.6	149.793				1.75667	1.95667	4.45708
1	0.8	0.85	High	93	7	O3	3	121.557	121.557	154.25	121.2	115.7	149.893				0.356667	5.85667	4.35674
1	0.8	0.85	High	93	7	O3	3	121.557	121.557	154.25	120.4	113.6	150.003				1.15667	7.95667	4.24666
1	0.8	0.85	High	93	7	O3	3	121.557	121.557	154.25	120.5	115.5	150.109				1.05667	6.05667	4.14099
1	0.8	0.75	High	56	9	O1	1	98.14	72.7333	47.4933	95.3333	66.6	39.568	0.978718	3.8142	2.89555	2.80667	6.13333	7.92536
1	0.8	0.75	High	56	9	O1	1	98.14	72.7333	47.4933	94.7	66.3	40.584				3.44	6.43333	6.90937
1	0.8	0.75	High	56	9	O1	1	98.14	72.7333	47.4933	96.7667	59.4333	41.5058				1.37333	13.3	5.98749
1	0.8	0.75	High	56	9	O1	1	98.14	72.7333	47.4933	96.7	64.5	42.4432				1.44	8.23333	5.05011
1	0.8	0.75	High	56	9	O1	1	98.14	72.7333	47.4933	96.3	62.7333	43.389				1.84	10	4.10431
1	0.8	0.75	High	56	9	O1	1	98.14	72.7333	47.4933	97.1667	64.2333	44.3493				0.973333	8.5	3.14405
1	0.8	0.75	High	56	9	O1	1	98.14	72.7333	47.4933	96.2667	61.6333	45.2796				1.87333	11.1	2.21372
1	0.8	0.75	High	56	9	O1	1	98.14	72.7333	47.4933	96.2333	55.3667	46.2838				1.90667	17.3667	1.20956
1	0.8	0.75	High	56	9	O1	1	98.14	72.7333	47.4933	97.7333	67.8333	47.2505				0.406667	4.9	0.2428
1	0.8	0.75	High	56	9	O1	1	98.14	72.7333	47.4933	97.8333	66.0333	48.2091				0.306667	6.7	0.715765
1	0.8	0.75	High	56	9	O1	2	98.2033	72.8067	47.03	96.5	46.8	39.2275	0.377676	8.10707	0.492106	1.70333	26.0067	7.80254
1	0.8	0.75	High	56	9	O1	2	98.2033	72.8067	47.03	97.125	50.025	39.4407				1.07833	22.7817	7.58928
1	0.8	0.75	High	56	9	O1	2	98.2033	72.8067	47.03	96.9	50.625	39.542				1.30333	22.1817	7.48802
1	0.8	0.75	High	56	9	O1	2	98.2033	72.8067	47.03	97.1	49.5	39.7579				1.10333	23.3067	7.27207
1	0.8	0.75	High	56	9	O1	2	98.2033	72.8067	47.03	96.625	55.05	40.0108				1.57833	17.7567	7.01921
1	0.8	0.75	High	56	9	O1	2	98.2033	72.8067	47.03	96.3	55.3	40.2169				1.90333	17.5067	6.81308
1	0.8	0.75	High	56	9	O1	2	98.2033	72.8067	47.03	96.45	64.075	40.4148				1.75333	8.73167	6.61518
1	0.8	0.75	High	56	9	O1	2	98.2033	72.8067	47.03	97.175	66.925	40.4148				1.02833	5.88167	6.61518
1	0.8	0.75	High	56	9	O1	2	98.2033	72.8067	47.03	97.4	65.35	40.7823				0.803333	7.45667	6.2477
1	0.8	0.75	High	56	9	O1	2	98.2033	72.8067	47.03	97.175	67.825	40.0293				1.02833	4.98167	7.00075
1	0.8	0.75	High	56	9	O1	3	98.1133	72.7433	46.27	94.5	68.725	39.4647	1.25745	3.03553	2.74597	3.61333	4.01833	6.80532
1	0.8	0.75	High	56	9	O1	3	98.1133	72.7433	46.27	93.875	58.325	40.4322				4.23833	14.4183	5.8378
1	0.8	0.75	High	56	9	O1	3	98.1133	72.7433	46.27	95.675	63.525	41.3357				2.43833	9.21833	4.93427
1	0.8	0.75	High	56	9	O1	3	98.1133	72.7433	46.27	95.1	64.25	42.2431				3.01333	8.49333	4.02694
1	0.8	0.75	High	56	9	O1	3	98.1133	72.7433	46.27	95	65.675	43.1121				3.11333	7.06833	3.15786
1	0.8	0.75	High	56	9	O1	3	98.1133	72.7433	46.27	96.625	66.575	44.0261				1.48833	6.16833	2.24387
1	0.8	0.75	High	56	9	O1	3	98.1133	72.7433	46.27	97.775	65.675	44.9003				0.338333	7.06833	1.36968
1	0.8	0.75	High	56	9	O1	3	98.1133	72.7433	46.27	95.45	65.075	45.8214				2.66333	7.66833	0.448639
1	0.8	0.75	High	56	9	O1	3	98.1133	72.7433	46.27	96.7	63.325	46.7225				1.41333	9.41833	0.452546
1	0.8	0.75	High	56	9	O1	3	98.1133	72.7433	46.27	97.275	60.2	47.7194				0.838333	12.5433	1.44936
1	0.8	0.75	High	56	9	O2	1	65.9933	65.9933	94.82	53.65	56.85	85.6757	6.27856	2.56507	2.41963	12.3433	9.14333	9.14429
1	0.8	0.75	High	56	9	O2	1	65.9933	65.9933	94.82	39.0333	51.2667	86.4648				26.96	14.7267	8.35523
1	0.8	0.75	High	56	9	O2	1	65.9933	65.9933	94.82	40.5333	58.35	87.3623				25.46	7.64333	7.45766
1	0.8	0.75	High	56	9	O2	1	65.9933	65.9933	94.82	46.3	57.3833	88.1585				19.6933	8.61	6.66154
1	0.8	0.75	High	56	9	O2	1	65.9933	65.9933	94.82	35.3833	52.7167	88.9591				30.61	13.2767	5.86094
1	0.8	0.75	High	56	9	O2	1	65.9933	65.9933	94.82	43.2	54.6833	89.7102				22.7933	11.31	5.10978
1	0.8	0.75	High	56	9	O2	1	65.9933	65.9933	94.82	33.3	57.2833	90.4959				32.6933	8.71	4.32412
1	0.8	0.75	High	56	9	O2	1	65.9933	65.9933	94.82	35.9833	56.45	91.2917				30.01	9.54333	3.52835
1	0.8	0.75	High	56	9	O2	1	65.9933	65.9933	94.82	34.1667	56.3	92.0705				31.8267	9.69333	2.74954
1	0.8	0.75	High	56	9	O2	1	65.9933	65.9933	94.82	41.3333	59.7833	92.92				24.66	6.21	1.89999
1	0.8	0.75	High	56	9	O2	2	64.885	64.885	94.8967	44.52	50.86	86.2228	5.90626	3.88203	2.32126	20.365	14.025	8.67386
1	0.8	0.75	High	56	9	O2	2	64.885	64.885	94.8967	49.76	53.22	87.0391				15.125	11.665	7.85755
1	0.8	0.75	High	56	9	O2	2	64.885	64.885	94.8967	43.26	52.98	87.8022				21.625	11.905	7.09444
1	0.8	0.75	High	56	9	O2	2	64.885	64.885	94.8967	50.6	59.08	88.5831				14.285	5.805	6.31361
1	0.8	0.75	High	56	9	O2	2	64.885	64.885	94.8967	56.16	59.12	89.3388				8.725	5.765	5.55789
1	0.8	0.75	High	56	9	O2	2	64.885	64.885	94.8967	53.48	49.2	90.1179				11.405	15.685	4.77879
1	0.8	0.75	High	56	9	O2	2	64.885	64.885	94.8967	37.66	58.64	90.8639				27.225	6.245	4.03278
1	0.8	0.75	High	56	9	O2	2	64.885	64.885	94.8967	47.64	55.6	91.6309				17.245	9.285	3.26574
1	0.8	0.75	High	56	9	O2	2	64.885	64.885	94.8967	56.44	49.44	92.3885				8.445	15.445	2.5082
1	0.8	0.75	High	56	9	O2	2	64.885	64.885	94.8967	49.84	56.52	93.1438				15.045	8.365	1.75288
1	0.8	0.75	High	56	9	O2	3	63.6867	63.6867	94.8967	48.4	42.275	86.9165	10.8054	6.55638	1.58407	15.2867	21.4117	7.98015
1	0.8	0.75	High	56	9	O2	3	63.6867	63.6867	94.8967	48.35	42.475	87.4993				15.3367	21.2117	7.39733
1	0.8	0.75	High	56	9	O2	3	63.6867	63.6867	94.8967	37.325	36.425	88.0271				26.3617	27.2617	6.86959
1	0.8	0.75	High	56	9	O2	3	63.6867	63.6867	94.8967	23.475	35.65	88.5262				40.2117	28.0367	6.37046
1	0.8	0.75	High	56	9	O2	3	63.6867	63.6867	94.8967	27.5	28.125	89.0279				36.1867	35.5617	5.86877
1	0.8	0.75	High	56	9	O2	3	63.6867	63.6867	94.8967	36.85	45.175	89.5731				26.8367	18.5117	5.3236
1	0.8	0.75	High	56	9	O2	3	63.6867	63.6867	94.8967	22.4	25.8	90.0571				41.2867	37.8867	4.83961
1	0.8	0.75	High	56	9	O2	3	63.6867	63.6867	94.8967	47.825	29.2	90.5761				15.8617	34.4867	4.32057
1	0.8	0.75	High	56	9	O2	3	63.6867	63.6867	94.8967	23.4	34.8	91.1357				40.2867	28.8867	3.76097
1	0.8	0.75	High	56	9	O2	3	63.6867	63.6867	94.8967	41.5	32.35	91.6919				22.1867	31.3367	3.20478
1	0.8	0.75	High	56	9	O3	1	120.858	120.858	154.833	80.2	109.1	145.613	7.658	31.9828	0.670631	40.6575	11.7575	9.2207
1	0.8	0.75	High	56	9	O3	1	120.858	120.858	154.833	91	110.9	145.791				29.8575	9.9575	9.04246
1	0.8	0.75	High	56	9	O3	1	120.858	120.858	154.833	91.7	39.9	146.034				29.1575	80.9575	8.79957
1	0.8	0.75	High	56	9	O3	1	120.858	120.858	154.833	90	45.3	146.284				30.8575	75.5575	8.54955
1	0.8	0.75	High	56	9	O3	1	120.858	120.858	154.833	88.1	69.6	146.479				32.7575	51.2575	8.354
1	0.8	0.75	High	56	9	O3	1	120.858	120.858	154.833	93	39.5	146.692				27.8575	81.3575	8.1417
1	0.8	0.75	High	56	9	O3	1	120.858	120.858	154.833	70	110.8	146.939				50.8575	10.0575	7.89478
1	0.8	0.75	High	56	9	O3	1	120.858	120.858	154.833	97	100.1	147.184				23.8575	20.7575	7.64958
1	0.8	0.75	High	56	9	O3	1	120.858	120.858	154.833	88.2	109.6	147.378				32.6575	11.2575	7.45536
1	0.8	0.75	High	56	9	O3	1	120.858	120.858	154.833	91.2	108.3	147.556				29.6575	12.5575	7.27719
1	0.8	0.75	High	56	9	O3	2	119.83	119.83	155.667	76.1	78.5	146.992	33.8191	20.5229	1.35742	43.73	41.33	8.67448
1	0.8	0.75	High	56	9	O3	2	119.83	119.83	155.667	103.7	77.8	147.414				16.13	42.03	8.25313
1	0.8	0.75	High	56	9	O3	2	119.83	119.83	155.667	5.4	39.6	147.894				114.43	80.23	7.77274
1	0.8	0.75	High	56	9	O3	2	119.83	119.83	155.667	105.1	68	148.357				14.73	51.83	7.30987
1	0.8	0.75	High	56	9	O3	2	119.83	119.83	155.667	98	78.7	148.761				21.83	41.13	6.90552
1	0.8	0.75	High	56	9	O3	2	119.83	119.83	155.667	115	78.4	149.23				4.83	41.43	6.43627
1	0.8	0.75	High	56	9	O3	2	119.83	119.83	155.667	116.5	79.8	149.711				3.33	40.03	5.95557
1	0.8	0.75	High	56	9	O3	2	119.83	119.83	155.667	102	59	150.147				17.83	60.83	5.51981
1	0.8	0.75	High	56	9	O3	2	119.83	119.83	155.667	117.3	20.7	150.553				2.53	99.13	5.11398
1	0.8	0.75	High	56	9	O3	2	119.83	119.83	155.667	112.7	79.7	151.014				7.13	40.13	4.65253
1	0.8	0.75	High	56	9	O3	3	121.557	121.557	154.25	86.8	117	144.24	43.237	29.7724	1.077	34.7567	4.55667	10.0104
1	0.8	0.75	High	56	9	O3	3	121.557	121.557	154.25	106.9	85.5	144.537				14.6567	36.0567	9.71298
1	0.8	0.75	High	56	9	O3	3	121.557	121.557	154.25	102.2	84.3	144.899				19.3567	37.2567	9.35069
1	0.8	0.75	High	56	9	O3	3	121.557	121.557	154.25	5.4	82.5	145.278				116.157	39.0567	8.97184
1	0.8	0.75	High	56	9	O3	3	121.557	121.557	154.25	116	83.7	145.65				5.55667	37.8567	8.59988
1	0.8	0.75	High	56	9	O3	3	121.557	121.557	154.25	112.7	106.4	146.017				8.85667	15.1567	8.23348
1	0.8	0.75	High	56	9	O3	3	121.557	121.557	154.25	4.6	8.5	146.342				116.957	113.057	7.90782
1	0.8	0.75	High	56	9	O3	3	121.557	121.557	154.25	108.2	71.7	146.709				13.3567	49.8567	7.54068
1	0.8	0.75	High	56	9	O3	3	121.557	121.557	154.25	112.3	55	147.071				9.25667	66.5567	7.17929
1	0.8	0.75	High	56	9	O3	3	121.557	121.557	154.25	100.4	66.2	147.388				21.1567	55.3567	6.8617
1	0.67	0.95	High	168	4	O1	1	98.14	72.7333	47.4933	98.0667	69.0667	42.3179	0.195915	2.33119	3.9856	0.0733333	3.66667	5.17546
1	0.67	0.95	High	168	4	O1	1	98.14	72.7333	47.4933	98.5333	71.0667	43.5507				0.393333	1.66667	3.9426
1	0.67	0.95	High	168	4	O1	1	98.14	72.7333	47.4933	98.1	68.2333	44.8231				0.04	4.5	2.67026
1	0.67	0.95	High	168	4	O1	1	98.14	72.7333	47.4933	98.4333	65.9333	46.0962				0.293333	6.8	1.39714
1	0.67	0.95	High	168	4	O1	1	98.14	72.7333	47.4933	98.2333	68.5333	47.4927				0.0933333	4.2	0.000653206
1	0.67	0.95	High	168	4	O1	1	98.14	72.7333	47.4933	98.1667	69.6	48.7307				0.0266667	3.13333	1.23733
1	0.67	0.95	High	168	4	O1	1	98.14	72.7333	47.4933	98.3	70.7667	50.0665				0.16	1.96667	2.57317
1	0.67	0.95	High	168	4	O1	1	98.14	72.7333	47.4933	98.3	73.6667	51.4335				0.16	0.933333	3.94019
1	0.67	0.95	High	168	4	O1	1	98.14	72.7333	47.4933	98	66.5333	52.7786				0.14	6.2	5.28529
1	0.67	0.95	High	168	4	O1	1	98.14	72.7333	47.4933	97.9	71.3	54.1387				0.24	1.43333	6.64535
1	0.67	0.95	High	168	4	O1	2	98.2033	72.8067	47.03	99.45	71.275	45.5994	0.370857	0.836262	6.32136	1.24667	1.53167	1.43064
1	0.67	0.95	High	168	4	O1	2	98.2033	72.8067	47.03	98.725	71.7	47.4603				0.521667	1.10667	0.430344
1	0.67	0.95	High	168	4	O1	2	98.2033	72.8067	47.03	98.925	71	49.6149				0.721667	1.80667	2.58489
1	0.67	0.95	High	168	4	O1	2	98.2033	72.8067	47.03	98.7	69.525	51.6769				0.496667	3.28167	4.64693
1	0.67	0.95	High	168	4	O1	2	98.2033	72.8067	47.03	98.525	71.525	53.8382				0.321667	1.28167	6.80816
1	0.67	0.95	High	168	4	O1	2	98.2033	72.8067	47.03	98.95	70.025	55.9687				0.746667	2.78167	8.93872
1	0.67	0.95	High	168	4	O1	2	98.2033	72.8067	47.03	98.65	69.425	58.3172				0.446667	3.38167	11.2872
1	0.67	0.95	High	168	4	O1	2	98.2033	72.8067	47.03	98	70.65	60.2649				0.203333	2.15667	13.2349
1	0.67	0.95	High	168	4	O1	2	98.2033	72.8067	47.03	98.5	71	62.3388				0.296667	1.80667	15.3088
1	0.67	0.95	High	168	4	O1	2	98.2033	72.8067	47.03	98.7	71.525	63.9222				0.496667	1.28167	16.8922
1	0.67	0.95	High	168	4	O1	3	98.1133	72.7433	46.27	99.35	70.175	44.6389	0.23184	0.715896	5.28564	1.23667	2.56833	1.63114
1	0.67	0.95	High	168	4	O1	3	98.1133	72.7433	46.27	99.075	71.7	46.2885				0.961667	1.04333	0.0184771
1	0.67	0.95	High	168	4	O1	3	98.1133	72.7433	46.27	99.125	70.9	48.0877				1.01167	1.84333	1.81768
1	0.67	0.95	High	168	4	O1	3	98.1133	72.7433	46.27	99.075	71.2	49.831				0.961667	1.54333	3.56095
1	0.67	0.95	High	168	4	O1	3	98.1133	72.7433	46.27	99.05	72.075	51.5504				0.936667	0.668333	5.28042
1	0.67	0.95	High	168	4	O1	3	98.1133	72.7433	46.27	99.075	71.875	53.4266				0.961667	0.868333	7.15657
1	0.67	0.95	High	168	4	O1	3	98.1133	72.7433	46.27	99.375	72.425	55.2377				1.26167	0.318333	8.96766
1	0.67	0.95	High	168	4	O1	3	98.1133	72.7433	46.27	98.775	72.025	56.831				0.661667	0.718333	10.561
1	0.67	0.95	High	168	4	O1	3	98.1133	72.7433	46.27	98.625	71.95	58.5318				0.511667	0.793333	12.2618
1	0.67	0.95	High	168	4	O1	3	98.1133	72.7433	46.27	99.225	70.75	60.2514				1.11167	1.99333	13.9814
1	0.67	0.95	High	168	4	O2	1	65.9933	65.9933	94.82	65.1	57.3167	87.8747	0.429887	1.69351	1.84774	0.893333	8.67667	6.94532
1	0.67	0.95	High	168	4	O2	1	65.9933	65.9933	94.82	64.75	58.4667	88.5288				1.24333	7.52667	6.29116
1	0.67	0.95	High	168	4	O2	1	65.9933	65.9933	94.82	63.9833	60.4833	89.1216				2.01	5.51	5.69836
1	0.67	0.95	High	168	4	O2	1	65.9933	65.9933	94.82	64.1667	59.7167	89.9255				1.82667	6.27667	4.89453
1	0.67	0.95	High	168	4	O2	1	65.9933	65.9933	94.82	63.9833	58.3833	90.4781				2.01	7.61	4.34191
1	0.67	0.95	High	168	4	O2	1	65.9933	65.9933	94.82	64.05	58.05	91.0213				1.94333	7.94333	3.79875
1	0.67	0.95	High	168	4	O2	1	65.9933	65.9933	94.82	64.7833	60.3167	91.6116				1.21	5.67667	3.20837
1	0.67	0.95	High	168	4	O2	1	65.9933	65.9933	94.82	64.5333	54.5667	92.1821				1.46	11.4267	2.63793
1	0.67	0.95	High	168	4	O2	1	65.9933	65.9933	94.82	64.9667	58.15	92.7742				1.02667	7.84333	2.04576
1	0.67	0.95	High	168	4	O2	1	65.9933	65.9933	94.82	64.15	58.2833	93.4309				1.84333	7.71	1.38915
1	0.67	0.95	High	168	4	O2	2	64.885	64.885	94.8967	63.65	59.6333	90.6201	0.179411	1.32899	0.859293	1.235	5.25167	4.27654
1	0.67	0.95	High	168	4	O2	2	64.885	64.885	94.8967	63.4667	61.1333	90.9165				1.41833	3.75167	3.98021
1	0.67	0.95	High	168	4	O2	2	64.885	64.885	94.8967	63.8167	60.5833	91.187				1.06833	4.30167	3.70966
1	0.67	0.95	High	168	4	O2	2	64.885	64.885	94.8967	63.8667	60.4667	91.4772				1.01833	4.41833	3.41946
1	0.67	0.95	High	168	4	O2	2	64.885	64.885	94.8967	63.9	60.5	91.759				0.985	4.385	3.13762
1	0.67	0.95	High	168	4	O2	2	64.885	64.885	94.8967	63.9333	59.0167	92.0444				0.951667	5.86833	2.8523
1	0.67	0.95	High	168	4	O2	2	64.885	64.885	94.8967	63.7167	59.5167	92.3369				1.16833	5.36833	2.55977
1	0.67	0.95	High	168	4	O2	2	64.885	64.885	94.8967	64.0667	58.9667	92.625				0.818333	5.91833	2.27163
1	0.67	0.95	High	168	4	O2	2	64.885	64.885	94.8967	63.9333	57.6	92.8855				0.951667	7.285	2.01118
1	0.67	0.95	High	168	4	O2	2	64.885	64.885	94.8967	64	57.05	93.1746				0.885	7.835	1.7221
1	0.67	0.95	High	168	4	O2	3	63.6867	63.6867	94.8967	63.8833	60.2333	87.8213	0.466812	0.659613	2.52344	0.196667	3.45333	7.07536
1	0.67	0.95	High	168	4	O2	3	63.6867	63.6867	94.8967	63.1333	62.3	88.7542				0.553333	1.38667	6.14246
1	0.67	0.95	High	168	4	O2	3	63.6867	63.6867	94.8967	63.1	60.7833	89.536				0.586667	2.90333	5.36063
1	0.67	0.95	High	168	4	O2	3	63.6867	63.6867	94.8967	64	60.0167	90.3552				0.313333	3.67	4.54146
1	0.67	0.95	High	168	4	O2	3	63.6867	63.6867	94.8967	62.9167	61.3167	91.2808				0.77	2.37	3.61583
1	0.67	0.95	High	168	4	O2	3	63.6867	63.6867	94.8967	63.9167	60.9333	92.0462				0.23	2.75333	2.85042
1	0.67	0.95	High	168	4	O2	3	63.6867	63.6867	94.8967	63.4833	61.3167	92.8582				0.203333	2.37	2.03847
1	0.67	0.95	High	168	4	O2	3	63.6867	63.6867	94.8967	64	61.0333	93.7091				0.313333	2.65333	1.18761
1	0.67	0.95	High	168	4	O2	3	63.6867	63.6867	94.8967	64.3	60.4167	94.533				0.613333	3.27	0.363677
1	0.67	0.95	High	168	4	O2	3	63.6867	63.6867	94.8967	63.8333	61.3	95.3677				0.146667	2.38667	0.471032
1	0.67	0.95	High	168	4	O3	1	120.858	120.858	154.833	115.8	120.8	148.955	1.16505	0.284605	2.24072	5.0575	0.0575	5.87844
1	0.67	0.95	High	168	4	O3	1	120.858	120.858	154.833	116	121.2	150.855				4.8575	0.3425	3.97838
1	0.67	0.95	High	168	4	O3	1	120.858	120.858	154.833	116.2	121.1	150.855				4.6575	0.2425	3.97838
1	0.67	0.95	High	168	4	O3	1	120.858	120.858	154.833	116.6	121.8	151.537				4.2575	0.9425	3.29634
1	0.67	0.95	High	168	4	O3	1	120.858	120.858	154.833	114.3	121.3	152.147				6.5575	0.4425	2.68612
1	0.67	0.95	High	168	4	O3	1	120.858	120.858	154.833	116.2	121.2	152.888				4.6575	0.3425	1.94493
1	0.67	0.95	High	168	4	O3	1	120.858	120.858	154.833	117.6	120.9	153.751				3.2575	0.0425	1.0819
1	0.67	0.95	High	168	4	O3	1	120.858	120.858	154.833	115.4	121.1	154.552				5.4575	0.2425	0.28153
1	0.67	0.95	High	168	4	O3	1	120.858	120.858	154.833	115.3	121.2	155.314				5.5575	0.3425	0.480668
1	0.67	0.95	High	168	4	O3	1	120.858	120.858	154.833	118.4	121.5	156.06				2.4575	0.6425	1.22715
1	0.67	0.95	High	168	4	O3	2	119.83	119.83	155.667	120	120.2	147.481	2.89935	1.60586	1.03855	0.17	0.37	8.18548
1	0.67	0.95	High	168	4	O3	2	119.83	119.83	155.667	116.8	119.8	148.036				3.03	0.03	7.63096
1	0.67	0.95	High	168	4	O3	2	119.83	119.83	155.667	118.1	118.5	148.036				1.73	1.33	7.63096
1	0.67	0.95	High	168	4	O3	2	119.83	119.83	155.667	116	115.1	148.597				3.83	4.73	7.06963
1	0.67	0.95	High	168	4	O3	2	119.83	119.83	155.667	115.6	117.9	148.923				4.23	1.93	6.74348
1	0.67	0.95	High	168	4	O3	2	119.83	119.83	155.667	116.2	118.1	149.28				3.63	1.73	6.38648
1	0.67	0.95	High	168	4	O3	2	119.83	119.83	155.667	118	120.2	149.57				1.83	0.37	6.09638
1	0.67	0.95	High	168	4	O3	2	119.83	119.83	155.667	111.9	120.2	149.94				7.93	0.37	5.72691
1	0.67	0.95	High	168	4	O3	2	119.83	119.83	155.667	120	117.7	150.265				0.17	2.13	5.40191
1	0.67	0.95	High	168	4	O3	2	119.83	119.83	155.667	111.6	119.2	150.593				8.23	0.63	5.07359
1	0.67	0.95	High	168	4	O3	3	121.557	121.557	154.25	112.7	112.9	149.712	2.92128	2.42725	0.778198	8.85667	8.65667	4.53803
1	0.67	0.95	High	168	4	O3	3	121.557	121.557	154.25	112.1	119.4	150.052				9.45667	2.15667	4.19803
1	0.67	0.95	High	168	4	O3	3	121.557	121.557	154.25	117.7	119.1	150.563				3.85667	2.45667	3.68663
1	0.67	0.95	High	168	4	O3	3	121.557	121.557	154.25	116	119.6	149.418				5.55667	1.95667	4.83172
1	0.67	0.95	High	168	4	O3	3	121.557	121.557	154.25	118.1	114.4	149.712				3.45667	7.15667	4.53803
1	0.67	0.95	High	168	4	O3	3	121.557	121.557	154.25	119.3	119.2	150.052				2.25667	2.35667	4.19803
1	0.67	0.95	High	168	4	O3	3	121.557	121.557	154.25	118.9	118.5	150.563				2.65667	3.05667	3.68663
1	0.67	0.95	High	168	4	O3	3	121.557	121.557	154.25	115.4	119.4	150.978				6.15667	2.15667	3.27207
1	0.67	0.95	High	168	4	O3	3	121.557	121.557	154.25	121.4	119.8	151.39				0.156667	1.75667	2.86047
1	0.67	0.95	High	168	4	O3	3	121.557	121.557	154.25	117.9	119.3	151.792				3.65667	2.25667	2.45847
1	0.67	0.85	High	56	9	O1	1	98.14	72.7333	47.4933	95.4	70.3333	41.3255	0.779688	2.96989	3.45278	2.74	2.4	6.16787
1	0.67	0.85	High	56	9	O1	1	98.14	72.7333	47.4933	97.3	69.8333	42.468				0.84	2.9	5.0253
1	0.67	0.85	High	56	9	O1	1	98.14	72.7333	47.4933	95.8	63.9667	43.5883				2.34	8.76667	3.90507
1	0.67	0.85	High	56	9	O1	1	98.14	72.7333	47.4933	95.8667	72.3	44.7238				2.27333	0.433333	2.76953
1	0.67	0.85	High	56	9	O1	1	98.14	72.7333	47.4933	97.2	68.4333	45.8699				0.94	4.3	1.62341
1	0.67	0.85	High	56	9	O1	1	98.14	72.7333	47.4933	97.4333	67.9333	46.9799				0.706667	4.8	0.513481
1	0.67	0.85	High	56	9	O1	1	98.14	72.7333	47.4933	97.1	62.7	48.1455				1.04	10.0333	0.652173
1	0.67	0.85	High	56	9	O1	1	98.14	72.7333	47.4933	97.0333	70.2	49.3351				1.10667	2.53333	1.8418
1	0.67	0.85	High	56	9	O1	1	98.14	72.7333	47.4933	97.3333	68.4667	50.4338				0.806667	4.26667	2.94046
1	0.67	0.85	High	56	9	O1	1	98.14	72.7333	47.4933	97.4333	70.0667	51.5806				0.706667	2.66667	4.08725
1	0.67	0.85	High	56	9	O1	2	98.2033	72.8067	47.03	100.2	67.8667	41.4883	0.871504	1.30064	3.52432	1.99667	4.94	5.54168
1	0.67	0.85	High	56	9	O1	2	98.2033	72.8067	47.03	100.7	69.0333	42.6238				2.49667	3.77333	4.40617
1	0.67	0.85	High	56	9	O1	2	98.2033	72.8067	47.03	99.8667	67.0333	43.7475				1.66333	5.77333	3.2825
1	0.67	0.85	High	56	9	O1	2	98.2033	72.8067	47.03	101.767	66.8333	44.8878				3.56333	5.97333	2.14219
1	0.67	0.85	High	56	9	O1	2	98.2033	72.8067	47.03	100.933	69.2	46.054				2.73	3.60667	0.975973
1	0.67	0.85	High	56	9	O1	2	98.2033	72.8067	47.03	99.6667	67.0333	47.2337				1.46333	5.77333	0.203745
1	0.67	0.85	High	56	9	O1	2	98.2033	72.8067	47.03	101.4	66.5667	48.4396				3.19667	6.24	1.40958
1	0.67	0.85	High	56	9	O1	2	98.2033	72.8067	47.03	101.433	70.7	49.522				3.23	2.10667	2.49195
1	0.67	0.85	High	56	9	O1	2	98.2033	72.8067	47.03	101.7	68.4	50.7933				3.49667	4.40667	3.76334
1	0.67	0.85	High	56	9	O1	2	98.2033	72.8067	47.03	99.4333	68.2	51.9506				1.23	4.60667	4.92062
1	0.67	0.85	High	56	9	O1	3	98.1133	72.7433	46.27	97.8	71.6333	39.8526	0.711319	2.35909	3.05725	0.313333	1.11	6.41735
1	0.67	0.85	High	56	9	O1	3	98.1133	72.7433	46.27	99	65.5	40.8621				0.886667	7.24333	5.4079
1	0.67	0.85	High	56	9	O1	3	98.1133	72.7433	46.27	98.7333	69.6333	41.8456				0.62	3.11	4.42441
1	0.67	0.85	High	56	9	O1	3	98.1133	72.7433	46.27	98.5	70.6	42.8323				0.386667	2.14333	3.43765
1	0.67	0.85	High	56	9	O1	3	98.1133	72.7433	46.27	99.6667	71.6333	43.8463				1.55333	1.11	2.42373
1	0.67	0.85	High	56	9	O1	3	98.1133	72.7433	46.27	98.5	67.7667	44.8468				0.386667	4.97667	1.42317
1	0.67	0.85	High	56	9	O1	3	98.1133	72.7433	46.27	98.4	67.7	45.9434				0.286667	5.04333	0.326627
1	0.67	0.85	High	56	9	O1	3	98.1133	72.7433	46.27	98.9667	68.4667	46.9036				0.853333	4.27667	0.633623
1	0.67	0.85	High	56	9	O1	3	98.1133	72.7433	46.27	99.3333	64.6667	47.9074				1.22	8.07667	1.63738
1	0.67	0.85	High	56	9	O1	3	98.1133	72.7433	46.27	100.3	68.7667	48.9266				2.18667	3.97667	2.65664
1	0.67	0.85	High	56	9	O2	1	65.9933	65.9933	94.82	39.3167	57.5833	85.6604	6.01113	2.93347	3.04751	26.6767	8.41	9.15956
1	0.67	0.85	High	56	9	O2	1	65.9933	65.9933	94.82	29.9	57.45	86.7786				36.0933	8.54333	8.04143
1	0.67	0.85	High	56	9	O2	1	65.9933	65.9933	94.82	42.7333	56.4833	87.6374				23.26	9.51	7.18264
1	0.67	0.85	High	56	9	O2	1	65.9933	65.9933	94.82	34.4333	54.4667	88.8493				31.56	11.5267	5.97075
1	0.67	0.85	High	56	9	O2	1	65.9933	65.9933	94.82	38.2833	52.5333	89.9157				27.71	13.46	4.90434
1	0.67	0.85	High	56	9	O2	1	65.9933	65.9933	94.82	39.1	52.0833	90.8984				26.8933	13.91	3.92165
1	0.67	0.85	High	56	9	O2	1	65.9933	65.9933	94.82	22.5	51.5	91.9032				43.4933	14.4933	2.91685
1	0.67	0.85	High	56	9	O2	1	65.9933	65.9933	94.82	33.2833	54.7167	92.8037				32.71	11.2767	2.01634
1	0.67	0.85	High	56	9	O2	1	65.9933	65.9933	94.82	37.0833	50.35	93.749				28.91	15.6433	1.07098
1	0.67	0.85	High	56	9	O2	1	65.9933	65.9933	94.82	40.9167	49.35	94.6849				25.0767	16.6433	0.13511
1	0.67	0.85	High	56	9	O2	2	64.885	64.885	94.8967	60.8333	56.7667	86.3603	0.68751	4.01941	2.39462	4.05167	8.11833	8.53637
1	0.67	0.85	High	56	9	O2	2	64.885	64.885	94.8967	58.7833	51.4667	87.0013				6.10167	13.4183	7.89534
1	0.67	0.85	High	56	9	O2	2	64.885	64.885	94.8967	60.35	55.8667	88.0222				4.535	9.01833	6.87448
1	0.67	0.85	High	56	9	O2	2	64.885	64.885	94.8967	60.0167	52.8	88.78				4.86833	12.085	6.11664
1	0.67	0.85	High	56	9	O2	2	64.885	64.885	94.8967	60.0667	51.8167	89.548				4.81833	13.0683	5.34869
1	0.67	0.85	High	56	9	O2	2	64.885	64.885	94.8967	61.1	57.0667	90.3711				3.785	7.81833	4.52557
1	0.67	0.85	High	56	9	O2	2	64.885	64.885	94.8967	60.75	53.3	91.0912				4.135	11.585	3.80547
1	0.67	0.85	High	56	9	O2	2	64.885	64.885	94.8967	60.2667	49.1	91.8888				4.61833	15.785	3.00785
1	0.67	0.85	High	56	9	O2	2	64.885	64.885	94.8967	60.7	43.6833	92.643				4.185	21.2017	2.25362
1	0.67	0.85	High	56	9	O2	2	64.885	64.885	94.8967	59.55	54.4	93.4572				5.335	10.485	1.43943
1	0.67	0.85	High	56	9	O2	3	63.6867	63.6867	94.8967	34.5833	48	94.2232	7.29509	4.92067	1.40305	29.1033	15.6867	0.67348
1	0.67	0.85	High	56	9	O2	3	63.6867	63.6867	94.8967	43.05	51.4833	94.6818				20.6367	12.2033	0.214892
1	0.67	0.85	High	56	9	O2	3	63.6867	63.6867	94.8967	46.9333	50.5167	95.1391				16.7533	13.17	0.24246
1	0.67	0.85	High	56	9	O2	3	63.6867	63.6867	94.8967	44.2333	45.1167	95.5864				19.4533	18.57	0.689781
1	0.67	0.85	High	56	9	O2	3	63.6867	63.6867	94.8967	54.6	47.45	96.0872				9.08667	16.2367	1.19053
1	0.67	0.85	High	56	9	O2	3	63.6867	63.6867	94.8967	42.2	44.9167	96.5277				21.4867	18.77	1.63102
1	0.67	0.85	High	56	9	O2	3	63.6867	63.6867	94.8967	34.8167	39.2667	97				28.87	24.42	2.1033
1	0.67	0.85	High	56	9	O2	3	63.6867	63.6867	94.8967	43.1833	40.9667	97.4642				20.5033	22.72	2.56754
1	0.67	0.85	High	56	9	O2	3	63.6867	63.6867	94.8967	32.1667	42.6333	97.9396				31.52	21.0533	3.04297
1	0.67	0.85	High	56	9	O2	3	63.6867	63.6867	94.8967	32	36.2333	98.3731				31.6867	27.4533	3.4764
1	0.67	0.85	High	56	9	O3	1	120.858	120.858	154.833	105.4	97.7	151.255	10.9485	7.28942	2.70053	15.4575	23.1575	3.57795
1	0.67	0.85	High	56	9	O3	1	120.858	120.858	154.833	77.5	109.2	152.061				43.3575	11.6575	2.77196
1	0.67	0.85	High	56	9	O3	1	120.858	120.858	154.833	104	97.8	152.891				16.8575	23.0575	1.94194
1	0.67	0.85	High	56	9	O3	1	120.858	120.858	154.833	103	99.8	153.71				17.8575	21.0575	1.12288
1	0.67	0.85	High	56	9	O3	1	120.858	120.858	154.833	104.8	98.8	154.597				16.0575	22.0575	0.236086
1	0.67	0.85	High	56	9	O3	1	120.858	120.858	154.833	101.1	102.2	155.499				19.7575	18.6575	0.665739
1	0.67	0.85	High	56	9	O3	1	120.858	120.858	154.833	118.5	114.6	156.367				2.3575	6.2575	1.534
1	0.67	0.85	High	56	9	O3	1	120.858	120.858	154.833	90.2	108.3	157.233				30.6575	12.5575	2.39946
1	0.67	0.85	High	56	9	O3	1	120.858	120.858	154.833	100.5	95.7	158.438				20.3575	25.1575	3.60456
1	0.67	0.85	High	56	9	O3	1	120.858	120.858	154.833	92.5	115.2	159.237				28.3575	5.6575	4.40342
1	0.67	0.85	High	56	9	O3	2	119.83	119.83	155.667	110.9	111.8	141.34	9.48314	8.50438	2.35928	8.93	8.03	14.3269
1	0.67	0.85	High	56	9	O3	2	119.83	119.83	155.667	109.9	109.7	142.371				9.93	10.13	13.2959
1	0.67	0.85	High	56	9	O3	2	119.83	119.83	155.667	107.7	108.8	143.011				12.13	11.03	12.6559
1	0.67	0.85	High	56	9	O3	2	119.83	119.83	155.667	103.8	106	143.986				16.03	13.83	11.6809
1	0.67	0.85	High	56	9	O3	2	119.83	119.83	155.667	107.6	109.4	144.632				12.23	10.43	11.0347
1	0.67	0.85	High	56	9	O3	2	119.83	119.83	155.667	111.8	106.7	145.405				8.03	13.13	10.2612
1	0.67	0.85	High	56	9	O3	2	119.83	119.83	155.667	115.9	111.5	146.155				3.93	8.33	9.51161
1	0.67	0.85	High	56	9	O3	2	119.83	119.83	155.667	81.6	113.9	146.946				38.23	5.93	8.72028
1	0.67	0.85	High	56	9	O3	2	119.83	119.83	155.667	108.8	106.8	147.718				11.03	13.03	7.94856
1	0.67	0.85	High	56	9	O3	2	119.83	119.83	155.667	111.9	83.7	148.463				7.93	36.13	7.20416
1	0.67	0.85	High	56	9	O3	3	121.557	121.557	154.25	111.6	84.6	146.869	4.56495	21.1882	1.79512	9.95667	36.9567	7.38054
1	0.67	0.85	High	56	9	O3	3	121.557	121.557	154.25	103.1	113.5	147.385				18.4567	8.05667	6.86525
1	0.67	0.85	High	56	9	O3	3	121.557	121.557	154.25	112.6	84.5	148.087				8.95667	37.0567	6.16335
1	0.67	0.85	High	56	9	O3	3	121.557	121.557	154.25	105.5	113	148.587				16.0567	8.55667	5.66323
1	0.67	0.85	High	56	9	O3	3	121.557	121.557	154.25	112	115.3	149.242				9.55667	6.25667	5.00845
1	0.67	0.85	High	56	9	O3	3	121.557	121.557	154.25	120.1	113	149.825				1.45667	8.55667	4.4252
1	0.67	0.85	High	56	9	O3	3	121.557	121.557	154.25	113.8	81.8	150.444				7.75667	39.7567	3.80639
1	0.67	0.85	High	56	9	O3	3	121.557	121.557	154.25	111.6	108.6	151.023				9.95667	12.9567	3.22676
1	0.67	0.85	High	56	9	O3	3	121.557	121.557	154.25	112	99	151.56				9.55667	22.5567	2.68964
1	0.67	0.85	High	56	9	O3	3	121.557	121.557	154.25	111.8	49.6	152.174				9.75667	71.9567	2.0756
1	0.67	0.75	High	34	11	O1	1	98.14	72.7333	47.4933	73.65	50.025	21.945	9.87787	4.51577	3.80264	24.49	22.7083	25.5483
1	0.67	0.75	High	34	11	O1	1	98.14	72.7333	47.4933	98.375	50.05	23.2104				0.235	22.6833	24.283
1	0.67	0.75	High	34	11	O1	1	98.14	72.7333	47.4933	98.275	53.9	24.4269				0.135	18.8333	23.0664
1	0.67	0.75	High	34	11	O1	1	98.14	72.7333	47.4933	99.5	61.625	25.7092				1.36	11.1083	21.7842
1	0.67	0.75	High	34	11	O1	1	98.14	72.7333	47.4933	97.7	58.2	26.9973				0.44	14.5333	20.4961
1	0.67	0.75	High	34	11	O1	1	98.14	72.7333	47.4933	95.75	64.025	28.2822				2.39	8.70833	19.2112
1	0.67	0.75	High	34	11	O1	1	98.14	72.7333	47.4933	96.35	55.375	29.4762				1.79	17.3583	18.0171
1	0.67	0.75	High	34	11	O1	1	98.14	72.7333	47.4933	75.125	58.825	30.7716				23.015	13.9083	16.7218
1	0.67	0.75	High	34	11	O1	1	98.14	72.7333	47.4933	97.225	57.425	31.9498				0.915	15.3083	15.5435
1	0.67	0.75	High	34	11	O1	1	98.14	72.7333	47.4933	98.15	56.8	33.2499				0.01	15.9333	14.2435
1	0.67	0.75	High	34	11	O1	2	98.2033	72.8067	47.03	97.3333	62.7333	21.632	1.1528	2.81544	3.56114	0.87	10.0733	25.398
1	0.67	0.75	High	34	11	O1	2	98.2033	72.8067	47.03	98.4	68.3667	22.7856				0.196667	4.44	24.2444
1	0.67	0.75	High	34	11	O1	2	98.2033	72.8067	47.03	99.0333	65.1667	23.9583				0.83	7.64	23.0717
1	0.67	0.75	High	34	11	O1	2	98.2033	72.8067	47.03	98	65.5333	25.1244				0.203333	7.27333	21.9056
1	0.67	0.75	High	34	11	O1	2	98.2033	72.8067	47.03	98.4	67.5333	26.3169				0.196667	5.27333	20.7131
1	0.67	0.75	High	34	11	O1	2	98.2033	72.8067	47.03	99.8	69.6667	27.4462				1.59667	3.14	19.5838
1	0.67	0.75	High	34	11	O1	2	98.2033	72.8067	47.03	99.6333	60	28.6296				1.43	12.8067	18.4004
1	0.67	0.75	High	34	11	O1	2	98.2033	72.8067	47.03	99.4667	63.6333	29.7882				1.26333	9.17333	17.2418
1	0.67	0.75	High	34	11	O1	2	98.2033	72.8067	47.03	101.233	65	31.0127				3.03	7.80667	16.0173
1	0.67	0.75	High	34	11	O1	2	98.2033	72.8067	47.03	100.2	65.8333	32.2631				1.99667	6.97333	14.7669
1	0.67	0.75	High	34	11	O1	3	98.1133	72.7433	46.27	99.2	63.275	34.5999	0.892546	3.50269	3.98017	1.08667	9.46833	11.6701
1	0.67	0.75	High	34	11	O1	3	98.1133	72.7433	46.27	99.075	62.95	35.7618				0.961667	9.79333	10.5082
1	0.67	0.75	High	34	11	O1	3	98.1133	72.7433	46.27	100.625	61.45	37.1592				2.51167	11.2933	9.11076
1	0.67	0.75	High	34	11	O1	3	98.1133	72.7433	46.27	100.35	63.8	38.4578				2.23667	8.94333	7.81222
1	0.67	0.75	High	34	11	O1	3	98.1133	72.7433	46.27	100.125	57.25	39.7468				2.01167	15.4933	6.5232
1	0.67	0.75	High	34	11	O1	3	98.1133	72.7433	46.27	101.875	57.425	41.1246				3.76167	15.3183	5.14537
1	0.67	0.75	High	34	11	O1	3	98.1133	72.7433	46.27	99.175	63.1	42.4177				1.06167	9.64333	3.85226
1	0.67	0.75	High	34	11	O1	3	98.1133	72.7433	46.27	100.15	68.8	43.6728				2.03667	3.94333	2.59717
1	0.67	0.75	High	34	11	O1	3	98.1133	72.7433	46.27	101.025	64.45	45.0567				2.91167	8.29333	1.2133
1	0.67	0.75	High	34	11	O1	3	98.1133	72.7433	46.27	100.6	65.775	46.3785				2.48667	6.96833	0.108465
1	0.67	0.75	High	34	11	O2	1	65.9933	65.9933	94.82	27.4	41.2	83.6511	6.42235	5.4733	2.23609	38.5933	24.7933	11.1689
1	0.67	0.75	High	34	11	O2	1	65.9933	65.9933	94.82	28.025	39.6	84.6871				37.9683	26.3933	10.1329
1	0.67	0.75	High	34	11	O2	1	65.9933	65.9933	94.82	36.6	42.775	85.5278				29.3933	23.2183	9.29219
1	0.67	0.75	High	34	11	O2	1	65.9933	65.9933	94.82	34.2	50.325	86.1549				31.7933	15.6683	8.66514
1	0.67	0.75	High	34	11	O2	1	65.9933	65.9933	94.82	36.525	46.975	86.9023				29.4683	19.0183	7.91771
1	0.67	0.75	High	34	11	O2	1	65.9933	65.9933	94.82	41.175	51.05	87.5941				24.8183	14.9433	7.22586
1	0.67	0.75	High	34	11	O2	1	65.9933	65.9933	94.82	37.45	53.175	88.298				28.5433	12.8183	6.52202
1	0.67	0.75	High	34	11	O2	1	65.9933	65.9933	94.82	44.375	56.6	89.0315				21.6183	9.39333	5.78853
1	0.67	0.75	High	34	11	O2	1	65.9933	65.9933	94.82	40.9	50.35	89.7709				25.0933	15.6433	5.04906
1	0.67	0.75	High	34	11	O2	1	65.9933	65.9933	94.82	47.225	49.975	90.4849				18.7683	16.0183	4.33512
1	0.67	0.75	High	34	11	O2	2	64.885	64.885	94.8967	42.0667	44.4	83.8214	9.31399	9.53392	2.19017	22.8183	20.485	11.0752
1	0.67	0.75	High	34	11	O2	2	64.885	64.885	94.8967	43.7333	48.5333	84.5952				21.1517	16.3517	10.3015
1	0.67	0.75	High	34	11	O2	2	64.885	64.885	94.8967	35.9333	45.7	85.3238				28.9517	19.185	9.57291
1	0.67	0.75	High	34	11	O2	2	64.885	64.885	94.8967	25.9667	44.1667	86.0369				38.9183	20.7183	8.85976
1	0.67	0.75	High	34	11	O2	2	64.885	64.885	94.8967	35	56.7667	86.7927				29.885	8.11833	8.10399
1	0.67	0.75	High	34	11	O2	2	64.885	64.885	94.8967	37.3333	49.3333	87.4967				27.5517	15.5517	7.39999
1	0.67	0.75	High	34	11	O2	2	64.885	64.885	94.8967	29.3333	42.7	88.2204				35.5517	22.185	6.67629
1	0.67	0.75	High	34	11	O2	2	64.885	64.885	94.8967	19.7	30.7	88.9266				45.185	34.185	5.97002
1	0.67	0.75	High	34	11	O2	2	64.885	64.885	94.8967	15.3333	23.1	89.6254				49.5517	41.785	5.27125
1	0.67	0.75	High	34	11	O2	2	64.885	64.885	94.8967	36.0333	42.5	90.3628				28.8517	22.385	4.53386
1	0.67	0.75	High	34	11	O2	3	63.6867	63.6867	94.8967	60.5	57.95	32.7907	2.05238	1.63691	1.53633	3.18667	5.73667	62.106
1	0.67	0.75	High	34	11	O2	3	63.6867	63.6867	94.8967	64.35	54.3	33.3162				0.663333	9.38667	61.5805
1	0.67	0.75	High	34	11	O2	3	63.6867	63.6867	94.8967	57.55	54.9	33.7933				6.13667	8.78667	61.1034
1	0.67	0.75	High	34	11	O2	3	63.6867	63.6867	94.8967	58.75	56.85	34.3517				4.93667	6.83667	60.545
1	0.67	0.75	High	34	11	O2	3	63.6867	63.6867	94.8967	58.75	53.5	34.8813				4.93667	10.1867	60.0154
1	0.67	0.75	High	34	11	O2	3	63.6867	63.6867	94.8967	58.7	58.6	35.3363				4.98667	5.08667	59.5604
1	0.67	0.75	High	34	11	O2	3	63.6867	63.6867	94.8967	62.8	56.2	35.8285				0.886667	7.48667	59.0682
1	0.67	0.75	High	34	11	O2	3	63.6867	63.6867	94.8967	59.8	56.05	36.3581				3.88667	7.63667	58.5385
1	0.67	0.75	High	34	11	O2	3	63.6867	63.6867	94.8967	60.55	54.4	36.8764				3.13667	9.28667	58.0203
1	0.67	0.75	High	34	11	O2	3	63.6867	63.6867	94.8967	59.9	56.1	37.3559				3.78667	7.58667	57.5408
1	0.67	0.75	High	34	11	O3	1	120.858	120.858	154.833	2.225	3.275	141.393	14.2005	19.4457	1.88204	118.633	117.582	13.4403
1	0.67	0.75	High	34	11	O3	1	120.858	120.858	154.833	0.525	1.35	142.058				120.332	119.508	12.7755
1	0.67	0.75	High	34	11	O3	1	120.858	120.858	154.833	2.275	7.1	142.614				118.582	113.758	12.2191
1	0.67	0.75	High	34	11	O3	1	120.858	120.858	154.833	2.025	5.2	143.343				118.832	115.657	11.4904
1	0.67	0.75	High	34	11	O3	1	120.858	120.858	154.833	20.425	29.05	143.889				100.433	91.8075	10.9444
1	0.67	0.75	High	34	11	O3	1	120.858	120.858	154.833	21	29.7	144.539				99.8575	91.1575	10.2939
1	0.67	0.75	High	34	11	O3	1	120.858	120.858	154.833	41.55	59.025	145.121				79.3075	61.8325	9.71278
1	0.67	0.75	High	34	11	O3	1	120.858	120.858	154.833	22.5	32.55	145.721				98.3575	88.3075	9.11248
1	0.67	0.75	High	34	11	O3	1	120.858	120.858	154.833	31.575	45.1	146.422				89.2825	75.7575	8.41099
1	0.67	0.75	High	34	11	O3	1	120.858	120.858	154.833	11.325	18.875	147.002				109.532	101.983	7.83126
1	0.67	0.75	High	34	11	O3	2	119.83	119.83	155.667	1.6	51.3	139.78	1.71646	29.2479	1.41685	118.23	68.53	15.887
1	0.67	0.75	High	34	11	O3	2	119.83	119.83	155.667	6.2	56.9	140.23				113.63	62.93	15.4364
1	0.67	0.75	High	34	11	O3	2	119.83	119.83	155.667	3	1.7	140.762				116.83	118.13	14.9046
1	0.67	0.75	High	34	11	O3	2	119.83	119.83	155.667	1.8	1.7	141.212				118.03	118.13	14.4543
1	0.67	0.75	High	34	11	O3	2	119.83	119.83	155.667	0.6	1.3	141.659				119.23	118.53	14.0073
1	0.67	0.75	High	34	11	O3	2	119.83	119.83	155.667	1.2	1.9	142.147				118.63	117.93	13.5195
1	0.67	0.75	High	34	11	O3	2	119.83	119.83	155.667	0.9	55.4	142.586				118.93	64.43	13.0805
1	0.67	0.75	High	34	11	O3	2	119.83	119.83	155.667	1.2	56.8	143.094				118.63	63.03	12.5729
1	0.67	0.75	High	34	11	O3	2	119.83	119.83	155.667	2.8	58.2	143.53				117.03	61.63	12.1368
1	0.67	0.75	High	34	11	O3	2	119.83	119.83	155.667	3.9	67.8	143.984				115.93	52.03	11.6823
1	0.67	0.75	High	34	11	O3	3	121.557	121.557	154.25	54.3	2.9	143.252	28.9113	5.59235	1.55904	67.2567	118.657	10.9984
1	0.67	0.75	High	34	11	O3	3	121.557	121.557	154.25	2.65	4.35	143.798				118.907	117.207	10.4524
1	0.67	0.75	High	34	11	O3	3	121.557	121.557	154.25	3.5	7.85	144.326				118.057	113.707	9.92412
1	0.67	0.75	High	34	11	O3	3	121.557	121.557	154.25	59.15	15.9	144.855				62.4067	105.657	9.39455
1	0.67	0.75	High	34	11	O3	3	121.557	121.557	154.25	2.95	4.35	145.343				118.607	117.207	8.90696
1	0.67	0.75	High	34	11	O3	3	121.557	121.557	154.25	53	7.85	145.822				68.5567	113.707	8.42829
1	0.67	0.75	High	34	11	O3	3	121.557	121.557	154.25	3.8	5.55	146.36				117.757	116.007	7.88985
1	0.67	0.75	High	34	11	O3	3	121.557	121.557	154.25	2.35	2.1	146.918				119.207	119.457	7.33189
1	0.67	0.75	High	34	11	O3	3	121.557	121.557	154.25	68.05	19.2	147.378				53.5067	102.357	6.87211
1	0.67	0.75	High	34	11	O3	3	121.557	121.557	154.25	3.75	8.55	147.912				117.807	113.007	6.33845
1	0.9	0.95	Low	278	2	O1	1	98.14	72.7333	47.4933	94.6667	44.9	40.1062	0.956647	7.08196	1.6363	3.47333	27.8333	7.38713
1	0.9	0.95	Low	278	2	O1	1	98.14	72.7333	47.4933	97.4667	61	40.1062				0.673333	11.7333	7.38713
1	0.9	0.95	Low	278	2	O1	1	98.14	72.7333	47.4933	96.1	68.0667	43.0099				2.04	4.66667	4.48343
1	0.9	0.95	Low	278	2	O1	1	98.14	72.7333	47.4933	96.5667	60.6667	43.0099				1.57333	12.0667	4.48343
1	0.9	0.95	Low	278	2	O1	1	98.14	72.7333	47.4933	95.5333	52	44.8901				2.60667	20.7333	2.6032
1	0.9	0.95	Low	278	2	O1	1	98.14	72.7333	47.4933	95.4333	61.1333	41.1024				2.70667	11.6	6.39092
1	0.9	0.95	Low	278	2	O1	1	98.14	72.7333	47.4933	95.3	66.2	40.3582				2.84	6.53333	7.13517
1	0.9	0.95	Low	278	2	O1	1	98.14	72.7333	47.4933	97.6333	63.3667	40.731				0.506667	9.36667	6.76231
1	0.9	0.95	Low	278	2	O1	1	98.14	72.7333	47.4933	96.6667	64.0333	40.0567				1.47333	8.7	7.43659
1	0.9	0.95	Low	278	2	O1	1	98.14	72.7333	47.4933	95.9333	65.5	41.3192				2.20667	7.23333	6.17409
1	0.9	0.95	Low	278	2	O1	2	98.2033	72.8067	47.03	97.0333	61.6333	43.3942	0.590511	5.44266	2.1038	1.17	11.1733	3.63576
1	0.9	0.95	Low	278	2	O1	2	98.2033	72.8067	47.03	95.2667	65.7	44.0094				2.93667	7.10667	3.02058
1	0.9	0.95	Low	278	2	O1	2	98.2033	72.8067	47.03	97.1	67.1667	44.552				1.10333	5.64	2.47803
1	0.9	0.95	Low	278	2	O1	2	98.2033	72.8067	47.03	97.1333	68.8667	45.2556				1.07	3.94	1.77437
1	0.9	0.95	Low	278	2	O1	2	98.2033	72.8067	47.03	96.7667	59.9	46.0428				1.43667	12.9067	0.98723
1	0.9	0.95	Low	278	2	O1	2	98.2033	72.8067	47.03	96.4667	64.4667	46.7534				1.73667	8.34	0.276561
1	0.9	0.95	Low	278	2	O1	2	98.2033	72.8067	47.03	96.9	72.4	47.7644				1.30333	0.406667	0.734374
1	0.9	0.95	Low	278	2	O1	2	98.2033	72.8067	47.03	96.2333	52.5	47.7644				1.97	20.3067	0.734374
1	0.9	0.95	Low	278	2	O1	2	98.2033	72.8067	47.03	96.1667	65.6	49.2622				2.03667	7.20667	2.23219
1	0.9	0.95	Low	278	2	O1	2	98.2033	72.8067	47.03	96.1	65.9333	49.2622				2.10333	6.87333	2.23219
1	0.9	0.95	Low	278	2	O1	3	98.1133	72.7433	46.27	97.4667	71.1333	40.9952	0.94383	2.63481	0.914471	0.646667	1.61	5.27483
1	0.9	0.95	Low	278	2	O1	3	98.1133	72.7433	46.27	98.8667	68.5333	40.5168				0.753333	4.21	5.75317
1	0.9	0.95	Low	278	2	O1	3	98.1133	72.7433	46.27	98.2667	73.1333	40.0447				0.153333	0.39	6.22534
1	0.9	0.95	Low	278	2	O1	3	98.1133	72.7433	46.27	98.5667	69.7	40.6043				0.453333	3.04333	5.66568
1	0.9	0.95	Low	278	2	O1	3	98.1133	72.7433	46.27	99.3	65.1333	40.1391				1.18667	7.61	6.13088
1	0.9	0.95	Low	278	2	O1	3	98.1133	72.7433	46.27	97.0667	68.2333	40.6982				1.04667	4.51	5.57184
1	0.9	0.95	Low	278	2	O1	3	98.1133	72.7433	46.27	96.3	65.1	41.2106				1.81333	7.64333	5.05944
1	0.9	0.95	Low	278	2	O1	3	98.1133	72.7433	46.27	97.8333	69.4333	41.7143				0.28	3.31	4.55572
1	0.9	0.95	Low	278	2	O1	3	98.1133	72.7433	46.27	97.2667	68.6333	42.2905				0.846667	4.11	3.97945
1	0.9	0.95	Low	278	2	O1	3	98.1133	72.7433	46.27	97	65.5333	42.81				1.11333	7.21	3.45999
1	0.9	0.95	Low	278	2	O2	1	65.9933	65.9933	94.82	52.8	60.2	89.3957	2.10438	1.42475	0.440258	13.1933	5.79333	5.42427
1	0.9	0.95	Low	278	2	O2	1	65.9933	65.9933	94.82	58.22	57.78	89.5374				7.77333	8.21333	5.28258
1	0.9	0.95	Low	278	2	O2	1	65.9933	65.9933	94.82	57.84	58.92	89.6923				8.15333	7.07333	5.12774
1	0.9	0.95	Low	278	2	O2	1	65.9933	65.9933	94.82	56.5	59.76	89.8342				9.49333	6.23333	4.98579
1	0.9	0.95	Low	278	2	O2	1	65.9933	65.9933	94.82	53.86	59.66	89.9726				12.1333	6.33333	4.84744
1	0.9	0.95	Low	278	2	O2	1	65.9933	65.9933	94.82	57.16	60.7	90.1175				8.83333	5.29333	4.70253
1	0.9	0.95	Low	278	2	O2	1	65.9933	65.9933	94.82	52.34	61.32	90.2849				13.6533	4.67333	4.53514
1	0.9	0.95	Low	278	2	O2	1	65.9933	65.9933	94.82	57.14	56.9	90.417				8.85333	9.09333	4.40303
1	0.9	0.95	Low	278	2	O2	1	65.9933	65.9933	94.82	56.18	60.94	90.546				9.81333	5.05333	4.27397
1	0.9	0.95	Low	278	2	O2	1	65.9933	65.9933	94.82	56.74	58.6	90.7078				9.25333	7.39333	4.11222
1	0.9	0.95	Low	278	2	O2	2	64.885	64.885	94.8967	55.58	59.06	90.3399	2.51888	2.86767	0.506487	9.305	5.825	4.55679
1	0.9	0.95	Low	278	2	O2	2	64.885	64.885	94.8967	58.18	59.08	90.5007				6.705	5.805	4.39599
1	0.9	0.95	Low	278	2	O2	2	64.885	64.885	94.8967	57.66	54.28	90.6741				7.225	10.605	4.22261
1	0.9	0.95	Low	278	2	O2	2	64.885	64.885	94.8967	52.52	59	90.8433				12.365	5.885	4.05335
1	0.9	0.95	Low	278	2	O2	2	64.885	64.885	94.8967	55.56	59.64	91.0029				9.325	5.245	3.89375
1	0.9	0.95	Low	278	2	O2	2	64.885	64.885	94.8967	58.02	58.82	91.1823				6.865	6.065	3.71434
1	0.9	0.95	Low	278	2	O2	2	64.885	64.885	94.8967	52.96	52.92	91.3502				11.925	11.965	3.54651
1	0.9	0.95	Low	278	2	O2	2	64.885	64.885	94.8967	57.98	55.98	91.5127				6.905	8.905	3.38399
1	0.9	0.95	Low	278	2	O2	2	64.885	64.885	94.8967	51.84	59.5	91.679				13.045	5.385	3.21768
1	0.9	0.95	Low	278	2	O2	2	64.885	64.885	94.8967	57.72	52.54	91.8354				7.165	12.345	3.06127
1	0.9	0.95	Low	278	2	O2	3	63.6867	63.6867	94.8967	56.3	49.3667	91.1792	1.92968	2.62168	0.306201	7.38667	14.32	3.71752
1	0.9	0.95	Low	278	2	O2	3	63.6867	63.6867	94.8967	53.7167	54.0333	91.2881				9.97	9.65333	3.60855
1	0.9	0.95	Low	278	2	O2	3	63.6867	63.6867	94.8967	58.0333	51.6667	91.3896				5.65333	12.02	3.50711
1	0.9	0.95	Low	278	2	O2	3	63.6867	63.6867	94.8967	54.2833	56.2333	91.4912				9.40333	7.45333	3.4055
1	0.9	0.95	Low	278	2	O2	3	63.6867	63.6867	94.8967	53.5333	52.6667	91.5941				10.1533	11.02	3.30257
1	0.9	0.95	Low	278	2	O2	3	63.6867	63.6867	94.8967	54.05	50.1333	91.695				9.63667	13.5533	3.20166
1	0.9	0.95	Low	278	2	O2	3	63.6867	63.6867	94.8967	53.6167	53.2333	91.7899				10.07	10.4533	3.10677
1	0.9	0.95	Low	278	2	O2	3	63.6867	63.6867	94.8967	53.5667	56.4667	91.8927				10.12	7.22	3.00401
1	0.9	0.95	Low	278	2	O2	3	63.6867	63.6867	94.8967	57.0833	49.0833	91.9896				6.60333	14.6033	2.90708
1	0.9	0.95	Low	278	2	O2	3	63.6867	63.6867	94.8967	51.7167	53.8333	92.0973				11.97	9.85333	2.79938
1	0.9	0.95	Low	278	2	O3	1	120.858	120.858	154.833	113.5	112.6	150.804	9.37026	7.98154	0.302064	7.3575	8.2575	4.02982
1	0.9	0.95	Low	278	2	O3	1	120.858	120.858	154.833	112.9	96.8	150.901				7.9575	24.0575	3.93224
1	0.9	0.95	Low	278	2	O3	1	120.858	120.858	154.833	117.4	111.6	151.001				3.4575	9.2575	3.83264
1	0.9	0.95	Low	278	2	O3	1	120.858	120.858	154.833	113.1	116.4	151.1				7.7575	4.4575	3.73322
1	0.9	0.95	Low	278	2	O3	1	120.858	120.858	154.833	117.3	121.4	151.2				3.5575	0.5425	3.63381
1	0.9	0.95	Low	278	2	O3	1	120.858	120.858	154.833	111.7	121.4	151.302				9.1575	0.5425	3.5313
1	0.9	0.95	Low	278	2	O3	1	120.858	120.858	154.833	113.3	117.8	151.401				7.5575	3.0575	3.43242
1	0.9	0.95	Low	278	2	O3	1	120.858	120.858	154.833	116.3	122.1	151.5				4.5575	1.2425	3.33318
1	0.9	0.95	Low	278	2	O3	1	120.858	120.858	154.833	85.3	122.2	151.601				35.5575	1.3425	3.23273
1	0.9	0.95	Low	278	2	O3	1	120.858	120.858	154.833	112.4	122.2	151.699				8.4575	1.3425	3.13394
1	0.9	0.95	Low	278	2	O3	2	119.83	119.83	155.667	116.1	107.1	151.025	5.93241	5.78781	0.372702	3.73	12.73	4.64165
1	0.9	0.95	Low	278	2	O3	2	119.83	119.83	155.667	114.6	120.5	151.11				5.23	0.67	4.55671
1	0.9	0.95	Low	278	2	O3	2	119.83	119.83	155.667	100.7	121.2	151.266				19.13	1.37	4.4003
1	0.9	0.95	Low	278	2	O3	2	119.83	119.83	155.667	117.2	121.6	151.387				2.63	1.77	4.27922
1	0.9	0.95	Low	278	2	O3	2	119.83	119.83	155.667	114.5	121.2	151.515				5.33	1.37	4.15133
1	0.9	0.95	Low	278	2	O3	2	119.83	119.83	155.667	116.3	109	151.617				3.53	10.83	4.04978
1	0.9	0.95	Low	278	2	O3	2	119.83	119.83	155.667	114.6	112.1	151.773				5.23	7.73	3.89363
1	0.9	0.95	Low	278	2	O3	2	119.83	119.83	155.667	102.9	121.8	151.876				16.93	1.97	3.79072
1	0.9	0.95	Low	278	2	O3	2	119.83	119.83	155.667	115.1	115.1	151.99				4.73	4.73	3.67628
1	0.9	0.95	Low	278	2	O3	2	119.83	119.83	155.667	116.7	121.5	152.117				3.13	1.67	3.54957
1	0.9	0.95	Low	278	2	O3	3	121.557	121.557	154.25	117.4	115.3	150.339	9.42626	9.38367	0.210288	4.15667	6.25667	3.91052
1	0.9	0.95	Low	278	2	O3	3	121.557	121.557	154.25	117.3	113.2	150.402				4.25667	8.35667	3.84848
1	0.9	0.95	Low	278	2	O3	3	121.557	121.557	154.25	109.2	94.2	150.467				12.3567	27.3567	3.7829
1	0.9	0.95	Low	278	2	O3	3	121.557	121.557	154.25	111.3	111	150.542				10.2567	10.5567	3.70809
1	0.9	0.95	Low	278	2	O3	3	121.557	121.557	154.25	108.1	111.4	150.615				13.4567	10.1567	3.63538
1	0.9	0.95	Low	278	2	O3	3	121.557	121.557	154.25	114	120.7	150.676				7.55667	0.856667	3.57423
1	0.9	0.95	Low	278	2	O3	3	121.557	121.557	154.25	117.3	113.4	150.75				4.25667	8.15667	3.50019
1	0.9	0.95	Low	278	2	O3	3	121.557	121.557	154.25	87.1	95.5	150.817				34.4567	26.0567	3.43256
1	0.9	0.95	Low	278	2	O3	3	121.557	121.557	154.25	111	102.7	150.901				10.5567	18.8567	3.34889
1	0.9	0.95	Low	278	2	O3	3	121.557	121.557	154.25	100.2	120.6	150.953				21.3567	0.956667	3.29691
1	0.9	0.85	Low	93	7	O1	1	98.14	72.7333	47.4933	95.8	67.9667	39.1581	12.6601	5.39923	2.26995	2.34	4.76667	8.33524
1	0.9	0.85	Low	93	7	O1	1	98.14	72.7333	47.4933	58.3	59.1	39.8889				39.84	13.6333	7.60444
1	0.9	0.85	Low	93	7	O1	1	98.14	72.7333	47.4933	95.9	60	40.6273				2.24	12.7333	6.86599
1	0.9	0.85	Low	93	7	O1	1	98.14	72.7333	47.4933	90.8	57.2333	41.3984				7.34	15.5	6.0949
1	0.9	0.85	Low	93	7	O1	1	98.14	72.7333	47.4933	75.4333	55.0667	42.1007				22.7067	17.6667	5.39259
1	0.9	0.85	Low	93	7	O1	1	98.14	72.7333	47.4933	94.8	61.3333	42.8545				3.34	11.4	4.63884
1	0.9	0.85	Low	93	7	O1	1	98.14	72.7333	47.4933	96.1333	67.3	43.6069				2.00667	5.43333	3.88647
1	0.9	0.85	Low	93	7	O1	1	98.14	72.7333	47.4933	96.0333	67.1	44.3481				2.10667	5.63333	3.14526
1	0.9	0.85	Low	93	7	O1	1	98.14	72.7333	47.4933	95.3667	68.9333	45.1562				2.77333	3.8	2.33709
1	0.9	0.85	Low	93	7	O1	1	98.14	72.7333	47.4933	95.8	55.6	45.9186				2.34	17.1333	1.57475
1	0.9	0.85	Low	93	7	O1	2	98.2033	72.8067	47.03	95.9667	59.5333	42.8074	1.51511	5.21252	4.36766	2.23667	13.2733	4.22263
1	0.9	0.85	Low	93	7	O1	2	98.2033	72.8067	47.03	96.2333	60.5333	44.1875				1.97	12.2733	2.84253
1	0.9	0.85	Low	93	7	O1	2	98.2033	72.8067	47.03	94.7333	56.6	45.5408				3.47	16.2067	1.48924
1	0.9	0.85	Low	93	7	O1	2	98.2033	72.8067	47.03	96.1	56.4667	46.9044				2.10333	16.34	0.125591
1	0.9	0.85	Low	93	7	O1	2	98.2033	72.8067	47.03	96.2333	66.3333	48.3326				1.97	6.47333	1.30261
1	0.9	0.85	Low	93	7	O1	2	98.2033	72.8067	47.03	93.9667	61.7	49.5776				4.23667	11.1067	2.54756
1	0.9	0.85	Low	93	7	O1	2	98.2033	72.8067	47.03	91.5333	52.7333	51.4339				6.67	20.0733	4.40389
1	0.9	0.85	Low	93	7	O1	2	98.2033	72.8067	47.03	95.7667	53.0333	53.6722				2.43667	19.7733	6.64224
1	0.9	0.85	Low	93	7	O1	2	98.2033	72.8067	47.03	96.1	61.0333	53.6722				2.10333	11.7733	6.64224
1	0.9	0.85	Low	93	7	O1	2	98.2033	72.8067	47.03	96.1333	68.7	55.6153				2.07	4.10667	8.58533
1	0.9	0.85	Low	93	7	O1	3	98.1133	72.7433	46.27	97.5	70.7333	41.1735	0.462094	5.11847	3.35983	0.613333	2.01	5.09654
1	0.9	0.85	Low	93	7	O1	3	98.1133	72.7433	46.27	98.3333	66.7	42.18				0.22	6.04333	4.08999
1	0.9	0.85	Low	93	7	O1	3	98.1133	72.7433	46.27	97.0333	73.0333	43.3096				1.08	0.29	2.96045
1	0.9	0.85	Low	93	7	O1	3	98.1133	72.7433	46.27	97.1333	64.6333	44.3398				0.98	8.11	1.93021
1	0.9	0.85	Low	93	7	O1	3	98.1133	72.7433	46.27	97.7333	73.1	45.4926				0.38	0.356667	0.777397
1	0.9	0.85	Low	93	7	O1	3	98.1133	72.7433	46.27	96.8667	60.7667	46.5569				1.24667	11.9767	0.286922
1	0.9	0.85	Low	93	7	O1	3	98.1133	72.7433	46.27	97.5333	69.4333	47.8033				0.58	3.31	1.53329
1	0.9	0.85	Low	93	7	O1	3	98.1133	72.7433	46.27	97.9667	57.2	48.7975				0.146667	15.5433	2.52749
1	0.9	0.85	Low	93	7	O1	3	98.1133	72.7433	46.27	97.1667	65.9333	50.1011				0.946667	6.81	3.83114
1	0.9	0.85	Low	93	7	O1	3	98.1133	72.7433	46.27	97.8	67.8	51.0309				0.313333	4.94333	4.76092
1	0.9	0.85	Low	93	7	O2	1	65.9933	65.9933	94.82	56.76	49.46	88.2575	4.63955	3.02355	0.777676	9.23333	16.5333	6.56247
1	0.9	0.85	Low	93	7	O2	1	65.9933	65.9933	94.82	58.36	58.24	88.4966				7.63333	7.75333	6.32345
1	0.9	0.85	Low	93	7	O2	1	65.9933	65.9933	94.82	55.64	55.3	88.7475				10.3533	10.6933	6.07247
1	0.9	0.85	Low	93	7	O2	1	65.9933	65.9933	94.82	45.02	50.16	89.0037				20.9733	15.8333	5.81635
1	0.9	0.85	Low	93	7	O2	1	65.9933	65.9933	94.82	48.48	52.94	89.2738				17.5133	13.0533	5.54621
1	0.9	0.85	Low	93	7	O2	1	65.9933	65.9933	94.82	58.04	52.92	89.5309				7.95333	13.0733	5.28908
1	0.9	0.85	Low	93	7	O2	1	65.9933	65.9933	94.82	53.8	57.48	89.7851				12.1933	8.51333	5.03493
1	0.9	0.85	Low	93	7	O2	1	65.9933	65.9933	94.82	57.94	54.9	90.0219				8.05333	11.0933	4.79806
1	0.9	0.85	Low	93	7	O2	1	65.9933	65.9933	94.82	52.06	50.38	90.2814				13.9333	15.6133	4.53855
1	0.9	0.85	Low	93	7	O2	1	65.9933	65.9933	94.82	58.44	54.54	90.5805				7.55333	11.4533	4.23945
1	0.9	0.85	Low	93	7	O2	2	64.885	64.885	94.8967	50.2833	55.05	88.7912	4.09932	3.76449	1.2738	14.6017	9.835	6.10543
1	0.9	0.85	Low	93	7	O2	2	64.885	64.885	94.8967	51.2833	48.7833	89.2366				13.6017	16.1017	5.66011
1	0.9	0.85	Low	93	7	O2	2	64.885	64.885	94.8967	48.05	57.65	89.6269				16.835	7.235	5.26975
1	0.9	0.85	Low	93	7	O2	2	64.885	64.885	94.8967	52.3667	49.95	90.061				12.5183	14.935	4.83564
1	0.9	0.85	Low	93	7	O2	2	64.885	64.885	94.8967	51.2333	48.0667	90.4747				13.6517	16.8183	4.42201
1	0.9	0.85	Low	93	7	O2	2	64.885	64.885	94.8967	55.2667	47.2833	90.8864				9.61833	17.6017	4.01028
1	0.9	0.85	Low	93	7	O2	2	64.885	64.885	94.8967	53.4	54.1167	91.3198				11.485	10.7683	3.57682
1	0.9	0.85	Low	93	7	O2	2	64.885	64.885	94.8967	40.1833	47.6333	91.7463				24.7017	17.2517	3.15034
1	0.9	0.85	Low	93	7	O2	2	64.885	64.885	94.8967	51.9833	47.45	92.1876				12.9017	17.435	2.70909
1	0.9	0.85	Low	93	7	O2	2	64.885	64.885	94.8967	49.5	48.1167	92.566				15.385	16.7683	2.33065
1	0.9	0.85	Low	93	7	O2	3	63.6867	63.6867	94.8967	56.58	45.06	86.8242	2.85354	4.63245	1.70806	7.10667	18.6267	8.07242
1	0.9	0.85	Low	93	7	O2	3	63.6867	63.6867	94.8967	57.86	47.5	87.3562				5.82667	16.1867	7.54049
1	0.9	0.85	Low	93	7	O2	3	63.6867	63.6867	94.8967	54.98	44.4	87.8796				8.70667	19.2867	7.01708
1	0.9	0.85	Low	93	7	O2	3	63.6867	63.6867	94.8967	47.74	48.34	88.4404				15.9467	15.3467	6.45626
1	0.9	0.85	Low	93	7	O2	3	63.6867	63.6867	94.8967	53.5	43.88	89.0578				10.1867	19.8067	5.83887
1	0.9	0.85	Low	93	7	O2	3	63.6867	63.6867	94.8967	54.66	50.72	89.5862				9.02667	12.9667	5.31051
1	0.9	0.85	Low	93	7	O2	3	63.6867	63.6867	94.8967	53.1	51.06	90.1602				10.5867	12.6267	4.73649
1	0.9	0.85	Low	93	7	O2	3	63.6867	63.6867	94.8967	55.6	44.36	90.7085				8.08667	19.3267	4.18821
1	0.9	0.85	Low	93	7	O2	3	63.6867	63.6867	94.8967	55.1	35.38	91.3511				8.58667	28.3067	3.54559
1	0.9	0.85	Low	93	7	O2	3	63.6867	63.6867	94.8967	51.48	49.76	91.8547				12.2067	13.9267	3.04196
1	0.9	0.85	Low	93	7	O3	1	120.858	120.858	154.833	110.8	114.2	146.693	2.48158	10.6405	0.536759	10.0575	6.6575	8.14026
1	0.9	0.85	Low	93	7	O3	1	120.858	120.858	154.833	117.7	116.6	146.845				3.1575	4.2575	7.9883
1	0.9	0.85	Low	93	7	O3	1	120.858	120.858	154.833	113.8	115.1	147.042				7.0575	5.7575	7.79126
1	0.9	0.85	Low	93	7	O3	1	120.858	120.858	154.833	115.1	82	147.217				5.7575	38.8575	7.61592
1	0.9	0.85	Low	93	7	O3	1	120.858	120.858	154.833	114.5	110	147.433				6.3575	10.8575	7.4004
1	0.9	0.85	Low	93	7	O3	1	120.858	120.858	154.833	112.4	117.2	147.574				8.4575	3.6575	7.25983
1	0.9	0.85	Low	93	7	O3	1	120.858	120.858	154.833	116.7	116.6	147.721				4.1575	4.2575	7.11207
1	0.9	0.85	Low	93	7	O3	1	120.858	120.858	154.833	118	114.8	147.887				2.8575	6.0575	6.94647
1	0.9	0.85	Low	93	7	O3	1	120.858	120.858	154.833	116.3	117	148.127				4.5575	3.8575	6.70664
1	0.9	0.85	Low	93	7	O3	1	120.858	120.858	154.833	118.1	112.3	148.291				2.7575	8.5575	6.54278
1	0.9	0.85	Low	93	7	O3	2	119.83	119.83	155.667	98.3	93.1	144.485	5.63525	11.3651	1.30642	21.53	26.73	11.1817
1	0.9	0.85	Low	93	7	O3	2	119.83	119.83	155.667	115.8	99.7	144.852				4.03	20.13	10.8146
1	0.9	0.85	Low	93	7	O3	2	119.83	119.83	155.667	108.3	94.3	145.223				11.53	25.53	10.4441
1	0.9	0.85	Low	93	7	O3	2	119.83	119.83	155.667	114.4	90.8	145.764				5.43	29.03	9.90295
1	0.9	0.85	Low	93	7	O3	2	119.83	119.83	155.667	116.8	88.4	146.143				3.03	31.43	9.52411
1	0.9	0.85	Low	93	7	O3	2	119.83	119.83	155.667	113.6	86.3	146.679				6.23	33.53	8.98763
1	0.9	0.85	Low	93	7	O3	2	119.83	119.83	155.667	114.4	100.5	147.01				5.43	19.33	8.65715
1	0.9	0.85	Low	93	7	O3	2	119.83	119.83	155.667	114.8	60.7	147.455				5.03	59.13	8.21145
1	0.9	0.85	Low	93	7	O3	2	119.83	119.83	155.667	116.2	97.1	147.88				3.63	22.73	7.78648
1	0.9	0.85	Low	93	7	O3	2	119.83	119.83	155.667	115.8	92.3	148.321				4.03	27.53	7.3458
1	0.9	0.85	Low	93	7	O3	3	121.557	121.557	154.25	112.6	113	146.106	4.926	10.1896	0.561864	8.95667	8.55667	8.14433
1	0.9	0.85	Low	93	7	O3	3	121.557	121.557	154.25	113.4	96	146.254				8.15667	25.5567	7.99627
1	0.9	0.85	Low	93	7	O3	3	121.557	121.557	154.25	110.7	111.7	146.449				10.8567	9.85667	7.80106
1	0.9	0.85	Low	93	7	O3	3	121.557	121.557	154.25	114.2	114.6	146.658				7.35667	6.95667	7.59207
1	0.9	0.85	Low	93	7	O3	3	121.557	121.557	154.25	114	116.1	146.855				7.55667	5.45667	7.39542
1	0.9	0.85	Low	93	7	O3	3	121.557	121.557	154.25	100.8	109.8	147				20.7567	11.7567	7.25015
1	0.9	0.85	Low	93	7	O3	3	121.557	121.557	154.25	107.8	113	147.205				13.7567	8.55667	7.04535
1	0.9	0.85	Low	93	7	O3	3	121.557	121.557	154.25	117.7	115.9	147.372				3.85667	5.65667	6.87815
1	0.9	0.85	Low	93	7	O3	3	121.557	121.557	154.25	112.2	84.6	147.575				9.35667	36.9567	6.67496
1	0.9	0.85	Low	93	7	O3	3	121.557	121.557	154.25	105.5	110.7	147.768				16.0567	10.8567	6.48217
1	0.9	0.75	Low	56	9	O1	1	98.14	72.7333	47.4933	93.9333	58.3333	39.5111	2.26057	6.68379	2.88449	4.20667	14.4	7.98224
1	0.9	0.75	Low	56	9	O1	1	98.14	72.7333	47.4933	95.2	63.5	40.4695				2.94	9.23333	7.02384
1	0.9	0.75	Low	56	9	O1	1	98.14	72.7333	47.4933	94.3667	51.6333	41.4037				3.77333	21.1	6.08965
1	0.9	0.75	Low	56	9	O1	1	98.14	72.7333	47.4933	93.8333	58.3333	42.41				4.30667	14.4	5.08329
1	0.9	0.75	Low	56	9	O1	1	98.14	72.7333	47.4933	95.2	69.3	43.3152				2.94	3.43333	4.17816
1	0.9	0.75	Low	56	9	O1	1	98.14	72.7333	47.4933	94.3	48.3333	44.3101				3.84	24.4	3.18322
1	0.9	0.75	Low	56	9	O1	1	98.14	72.7333	47.4933	89.6	54.9	45.1763				8.54	17.8333	2.31701
1	0.9	0.75	Low	56	9	O1	1	98.14	72.7333	47.4933	94.1	61.8667	46.2145				4.04	10.8667	1.27882
1	0.9	0.75	Low	56	9	O1	1	98.14	72.7333	47.4933	95.2333	56.5333	47.1196				2.90667	16.2	0.373694
1	0.9	0.75	Low	56	9	O1	1	98.14	72.7333	47.4933	89.0333	67.7	48.0991				9.10667	5.03333	0.605754
1	0.9	0.75	Low	56	9	O1	2	98.2033	72.8067	47.03	78.5667	60.8667	40.5514	10.5225	6.59924	3.04071	19.6367	11.94	6.47858
1	0.9	0.75	Low	56	9	O1	2	98.2033	72.8067	47.03	76.8667	72.4	41.5778				21.3367	0.406667	5.4522
1	0.9	0.75	Low	56	9	O1	2	98.2033	72.8067	47.03	62.7	49.7	42.5839				35.5033	23.1067	4.44614
1	0.9	0.75	Low	56	9	O1	2	98.2033	72.8067	47.03	92.2667	68.7667	43.5694				5.93667	4.04	3.46061
1	0.9	0.75	Low	56	9	O1	2	98.2033	72.8067	47.03	93.3	71.9333	44.5878				4.90333	0.873333	2.44224
1	0.9	0.75	Low	56	9	O1	2	98.2033	72.8067	47.03	93.9667	63.5	45.5916				4.23667	9.30667	1.43838
1	0.9	0.75	Low	56	9	O1	2	98.2033	72.8067	47.03	92.2667	68.5667	46.6441				5.93667	4.24	0.385931
1	0.9	0.75	Low	56	9	O1	2	98.2033	72.8067	47.03	93.7333	62.3667	47.6146				4.47	10.44	0.584597
1	0.9	0.75	Low	56	9	O1	2	98.2033	72.8067	47.03	93.6	65.5667	48.5903				4.60333	7.24	1.56025
1	0.9	0.75	Low	56	9	O1	2	98.2033	72.8067	47.03	88.2667	63.4667	49.578				9.93667	9.34	2.54797
1	0.9	0.75	Low	56	9	O1	3	98.1133	72.7433	46.27	97.1333	74.1	43.3907	2.9373	4.87504	4.76927	0.98	1.35667	2.87932
1	0.9	0.75	Low	56	9	O1	3	98.1133	72.7433	46.27	97.5667	70.8333	44.7904				0.546667	1.91	1.4796
1	0.9	0.75	Low	56	9	O1	3	98.1133	72.7433	46.27	95.0667	70.3333	46.143				3.04667	2.41	0.126975
1	0.9	0.75	Low	56	9	O1	3	98.1133	72.7433	46.27	93.0333	65.2667	47.7932				5.08	7.47667	1.52323
1	0.9	0.75	Low	56	9	O1	3	98.1133	72.7433	46.27	92.7667	76.3667	49.3346				5.34667	3.62333	3.06462
1	0.9	0.75	Low	56	9	O1	3	98.1133	72.7433	46.27	96.2667	63.8667	50.87				1.84667	8.87667	4.60005
1	0.9	0.75	Low	56	9	O1	3	98.1133	72.7433	46.27	91.1667	75.4	53.0808				6.94667	2.65667	6.81085
1	0.9	0.75	Low	56	9	O1	3	98.1133	72.7433	46.27	94.0667	74.3333	54.1938				4.04667	1.59	7.92383
1	0.9	0.75	Low	56	9	O1	3	98.1133	72.7433	46.27	88.4	73.1	55.9042				9.71333	0.356667	9.63416
1	0.9	0.75	Low	56	9	O1	3	98.1133	72.7433	46.27	96.7333	63.4333	57.1925				1.38	9.31	10.9225
1	0.9	0.75	Low	56	9	O2	1	65.9933	65.9933	94.82	44.3	58.18	87.8472	2.86392	3.05598	1.4228	21.6933	7.81333	6.97279
1	0.9	0.75	Low	56	9	O2	1	65.9933	65.9933	94.82	44.4	56.16	88.36				21.5933	9.83333	6.45999
1	0.9	0.75	Low	56	9	O2	1	65.9933	65.9933	94.82	40.78	57.8	88.8243				25.2133	8.19333	5.99573
1	0.9	0.75	Low	56	9	O2	1	65.9933	65.9933	94.82	47.16	50.42	89.2965				18.8333	15.5733	5.52345
1	0.9	0.75	Low	56	9	O2	1	65.9933	65.9933	94.82	37.86	56.44	89.7947				28.1333	9.55333	5.02533
1	0.9	0.75	Low	56	9	O2	1	65.9933	65.9933	94.82	40.94	56.78	90.2146				25.0533	9.21333	4.60544
1	0.9	0.75	Low	56	9	O2	1	65.9933	65.9933	94.82	39.42	54.24	90.6828				26.5733	11.7533	4.1372
1	0.9	0.75	Low	56	9	O2	1	65.9933	65.9933	94.82	43.74	55.8	91.1754				22.2533	10.1933	3.64455
1	0.9	0.75	Low	56	9	O2	1	65.9933	65.9933	94.82	42.54	48.92	91.654				23.4533	17.0733	3.16596
1	0.9	0.75	Low	56	9	O2	1	65.9933	65.9933	94.82	39.46	54.34	92.0848				26.5333	11.6533	2.73518
1	0.9	0.75	Low	56	9	O2	2	64.885	64.885	94.8967	45.12	49.62	85.4806	5.27068	5.89324	2.02161	19.765	15.265	9.41602
1	0.9	0.75	Low	56	9	O2	2	64.885	64.885	94.8967	36.94	48.26	86.0219				27.945	16.625	8.87478
1	0.9	0.75	Low	56	9	O2	2	64.885	64.885	94.8967	47.42	54.12	86.7207				17.465	10.765	8.17601
1	0.9	0.75	Low	56	9	O2	2	64.885	64.885	94.8967	34.02	35.96	87.4732				30.865	28.925	7.42351
1	0.9	0.75	Low	56	9	O2	2	64.885	64.885	94.8967	35.58	54.56	88.0651				29.305	10.325	6.83157
1	0.9	0.75	Low	56	9	O2	2	64.885	64.885	94.8967	32.02	50.02	88.7409				32.865	14.865	6.15576
1	0.9	0.75	Low	56	9	O2	2	64.885	64.885	94.8967	35	41.46	89.4538				29.885	23.425	5.44283
1	0.9	0.75	Low	56	9	O2	2	64.885	64.885	94.8967	35.62	49.7	90.1054				29.265	15.185	4.79122
1	0.9	0.75	Low	56	9	O2	2	64.885	64.885	94.8967	43.62	49.22	90.7486				21.265	15.665	4.14807
1	0.9	0.75	Low	56	9	O2	2	64.885	64.885	94.8967	41.16	42.02	91.4277				23.725	22.865	3.46894
1	0.9	0.75	Low	56	9	O2	3	63.6867	63.6867	94.8967	45.52	43.8	86.8008	6.26893	4.76091	2.27337	18.1667	19.8867	8.09583
1	0.9	0.75	Low	56	9	O2	3	63.6867	63.6867	94.8967	50.78	48.62	87.5229				12.9067	15.0667	7.37377
1	0.9	0.75	Low	56	9	O2	3	63.6867	63.6867	94.8967	43.68	52.44	88.3519				20.0067	11.2467	6.54476
1	0.9	0.75	Low	56	9	O2	3	63.6867	63.6867	94.8967	49.34	45.48	89.0831				14.3467	18.2067	5.81353
1	0.9	0.75	Low	56	9	O2	3	63.6867	63.6867	94.8967	48.92	51.46	89.8447				14.7667	12.2267	5.05197
1	0.9	0.75	Low	56	9	O2	3	63.6867	63.6867	94.8967	35.42	38.74	90.4743				28.2667	24.9467	4.42233
1	0.9	0.75	Low	56	9	O2	3	63.6867	63.6867	94.8967	33.3	45.22	91.3098				30.3867	18.4667	3.58687
1	0.9	0.75	Low	56	9	O2	3	63.6867	63.6867	94.8967	48.42	43.38	92.0747				15.2667	20.3067	2.82198
1	0.9	0.75	Low	56	9	O2	3	63.6867	63.6867	94.8967	45.9	38.82	92.7481				17.7867	24.8667	2.14853
1	0.9	0.75	Low	56	9	O2	3	63.6867	63.6867	94.8967	37.56	41.52	93.6194				26.1267	22.1667	1.27727
1	0.9	0.75	Low	56	9	O3	1	120.858	120.858	154.833	109.9	113.5	140.496	24.0563	10.466	2.86662	10.9575	7.3575	14.3375
1	0.9	0.75	Low	56	9	O3	1	120.858	120.858	154.833	109.6	88.6	141.86				11.2575	32.2575	12.9729
1	0.9	0.75	Low	56	9	O3	1	120.858	120.858	154.833	42.2	111	140.496				78.6575	9.8575	14.3375
1	0.9	0.75	Low	56	9	O3	1	120.858	120.858	154.833	66.3	113.4	141.86				54.5575	7.4575	12.9729
1	0.9	0.75	Low	56	9	O3	1	120.858	120.858	154.833	112	106	142.993				8.8575	14.8575	11.8399
1	0.9	0.75	Low	56	9	O3	1	120.858	120.858	154.833	105.1	105.4	144.194				15.7575	15.4575	10.6397
1	0.9	0.75	Low	56	9	O3	1	120.858	120.858	154.833	108.8	85.4	145.244				12.0575	35.4575	9.58956
1	0.9	0.75	Low	56	9	O3	1	120.858	120.858	154.833	114.6	109.5	146.14				6.2575	11.3575	8.69371
1	0.9	0.75	Low	56	9	O3	1	120.858	120.858	154.833	105.7	115	147.438				15.1575	5.8575	7.39583
1	0.9	0.75	Low	56	9	O3	1	120.858	120.858	154.833	108.8	111.4	148.615				12.0575	9.4575	6.21853
1	0.9	0.75	Low	56	9	O3	2	119.83	119.83	155.667	114.7	79.6	148.615	7.03796	14.9943	3.31503	5.13	40.23	7.05187
1	0.9	0.75	Low	56	9	O3	2	119.83	119.83	155.667	112.1	113.6	139.217				7.73	6.23	16.4495
1	0.9	0.75	Low	56	9	O3	2	119.83	119.83	155.667	92.5	88.9	141.323				27.33	30.93	14.3434
1	0.9	0.75	Low	56	9	O3	2	119.83	119.83	155.667	116.2	112	142.285				3.63	7.83	13.3814
1	0.9	0.75	Low	56	9	O3	2	119.83	119.83	155.667	113.8	99	143.582				6.03	20.83	12.0847
1	0.9	0.75	Low	56	9	O3	2	119.83	119.83	155.667	108	67.9	144.266				11.83	51.93	11.4009
1	0.9	0.75	Low	56	9	O3	2	119.83	119.83	155.667	115.6	93.5	145.74				4.23	26.33	9.92617
1	0.9	0.75	Low	56	9	O3	2	119.83	119.83	155.667	112.6	106.7	146.663				7.23	13.13	9.00329
1	0.9	0.75	Low	56	9	O3	2	119.83	119.83	155.667	113	105.6	148.149				6.83	14.23	7.51738
1	0.9	0.75	Low	56	9	O3	2	119.83	119.83	155.667	115.3	84.4	148.983				4.53	35.43	6.6837
1	0.9	0.75	Low	56	9	O3	3	121.557	121.557	154.25	78.5	94	145.512	11.4247	8.28214	0.561377	43.0567	27.5567	8.73792
1	0.9	0.75	Low	56	9	O3	3	121.557	121.557	154.25	103.3	91	145.679				18.2567	30.5567	8.57079
1	0.9	0.75	Low	56	9	O3	3	121.557	121.557	154.25	114.4	110.6	145.885				7.15667	10.9567	8.36527
1	0.9	0.75	Low	56	9	O3	3	121.557	121.557	154.25	100.9	98	146.059				20.6567	23.5567	8.19138
1	0.9	0.75	Low	56	9	O3	3	121.557	121.557	154.25	112.2	111.3	146.211				9.35667	10.2567	8.03892
1	0.9	0.75	Low	56	9	O3	3	121.557	121.557	154.25	104.8	107.1	146.408				16.7567	14.4567	7.84201
1	0.9	0.75	Low	56	9	O3	3	121.557	121.557	154.25	103	100	146.591				18.5567	21.5567	7.65853
1	0.9	0.75	Low	56	9	O3	3	121.557	121.557	154.25	111.9	114.5	146.803				9.65667	7.05667	7.4473
1	0.9	0.75	Low	56	9	O3	3	121.557	121.557	154.25	116.3	109.4	147.016				5.25667	12.1567	7.23416
1	0.9	0.75	Low	56	9	O3	3	121.557	121.557	154.25	117.2	96.5	147.16				4.35667	25.0567	7.08963
1	0.8	0.95	Low	139	5	O1	1	98.14	72.7333	47.4933	95.6	53.4333	44.5333	3.24883	7.61767	5.26804	2.54	19.3	2.96006
1	0.8	0.95	Low	139	5	O1	1	98.14	72.7333	47.4933	93.7	58.1667	46.354				4.44	14.5667	1.13937
1	0.8	0.95	Low	139	5	O1	1	98.14	72.7333	47.4933	94	47.1667	47.9573				4.14	25.5667	0.463925
1	0.8	0.95	Low	139	5	O1	1	98.14	72.7333	47.4933	94.1333	66.0667	49.6952				4.00667	6.66667	2.20187
1	0.8	0.95	Low	139	5	O1	1	98.14	72.7333	47.4933	95.1333	59.0333	51.5448				3.00667	13.7	4.05144
1	0.8	0.95	Low	139	5	O1	1	98.14	72.7333	47.4933	94.3333	68.5	53.0446				3.80667	4.23333	5.55131
1	0.8	0.95	Low	139	5	O1	1	98.14	72.7333	47.4933	84.3667	66.3	54.9214				13.7733	6.43333	7.42804
1	0.8	0.95	Low	139	5	O1	1	98.14	72.7333	47.4933	94.6	58.9333	57.1262				3.54	13.8	9.63282
1	0.8	0.95	Low	139	5	O1	1	98.14	72.7333	47.4933	94.9	70.6667	58.5327				3.24	2.06667	11.0394
1	0.8	0.95	Low	139	5	O1	1	98.14	72.7333	47.4933	93.3667	53.1667	59.9391				4.77333	19.5667	12.4457
1	0.8	0.95	Low	139	5	O1	2	98.2033	72.8067	47.03	95.4333	63.0667	39.6354	0.885577	4.40279	2.76971	2.77	9.74	7.39464
1	0.8	0.95	Low	139	5	O1	2	98.2033	72.8067	47.03	95.0333	73.4667	40.6175				3.17	0.66	6.41253
1	0.8	0.95	Low	139	5	O1	2	98.2033	72.8067	47.03	94.1	72.5	41.6196				4.10333	0.306667	5.41036
1	0.8	0.95	Low	139	5	O1	2	98.2033	72.8067	47.03	96.0333	73.7667	42.604				2.17	0.96	4.42597
1	0.8	0.95	Low	139	5	O1	2	98.2033	72.8067	47.03	96.0333	72.8	43.497				2.17	0.00666667	3.53301
1	0.8	0.95	Low	139	5	O1	2	98.2033	72.8067	47.03	96.4333	65.2667	44.5818				1.77	7.54	2.44821
1	0.8	0.95	Low	139	5	O1	2	98.2033	72.8067	47.03	94.4333	69.2	45.5724				3.77	3.60667	1.45762
1	0.8	0.95	Low	139	5	O1	2	98.2033	72.8067	47.03	94.2333	71.4333	46.4305				3.97	1.37333	0.599517
1	0.8	0.95	Low	139	5	O1	2	98.2033	72.8067	47.03	94.6667	62.8667	47.3188				3.53667	9.94	0.288798
1	0.8	0.95	Low	139	5	O1	2	98.2033	72.8067	47.03	94.0667	73.2667	47.3188				4.13667	0.46	0.288798
1	0.8	0.95	Low	139	5	O1	3	98.1133	72.7433	46.27	96.5667	72.2333	39.2111	0.881812	2.99555	2.61556	1.54667	0.51	7.05886
1	0.8	0.95	Low	139	5	O1	3	98.1133	72.7433	46.27	95.1	66.7	40.0713				3.01333	6.04333	6.19869
1	0.8	0.95	Low	139	5	O1	3	98.1133	72.7433	46.27	96.0667	74.3	40.9252				2.04667	1.55667	5.34477
1	0.8	0.95	Low	139	5	O1	3	98.1133	72.7433	46.27	94.2333	67.2667	41.7841				3.88	5.47667	4.48588
1	0.8	0.95	Low	139	5	O1	3	98.1133	72.7433	46.27	96.2333	72.4667	42.6477				1.88	0.276667	3.62225
1	0.8	0.95	Low	139	5	O1	3	98.1133	72.7433	46.27	94.9667	71.0333	43.5151				3.14667	1.71	2.75486
1	0.8	0.95	Low	139	5	O1	3	98.1133	72.7433	46.27	95.5333	76.5667	44.3297				2.58	3.82333	1.94033
1	0.8	0.95	Low	139	5	O1	3	98.1133	72.7433	46.27	93.7333	70.0667	45.149				4.38	2.67667	1.12099
1	0.8	0.95	Low	139	5	O1	3	98.1133	72.7433	46.27	95.1333	73.0667	46.0408				2.98	0.323333	0.229178
1	0.8	0.95	Low	139	5	O1	3	98.1133	72.7433	46.27	94.9333	71.2	47.1102				3.18	1.54333	0.840218
1	0.8	0.95	Low	139	5	O2	1	65.9933	65.9933	94.82	55.96	59.38	88.4292	5.07042	3.8983	0.787084	10.0333	6.61333	6.3908
1	0.8	0.95	Low	139	5	O2	1	65.9933	65.9933	94.82	57.48	58.32	88.6999				8.51333	7.67333	6.12007
1	0.8	0.95	Low	139	5	O2	1	65.9933	65.9933	94.82	55.48	56.52	88.9615				10.5133	9.47333	5.85847
1	0.8	0.95	Low	139	5	O2	1	65.9933	65.9933	94.82	51.24	57.56	89.215				14.7533	8.43333	5.60504
1	0.8	0.95	Low	139	5	O2	1	65.9933	65.9933	94.82	46.46	57.6	89.4577				19.5333	8.39333	5.36228
1	0.8	0.95	Low	139	5	O2	1	65.9933	65.9933	94.82	54.86	61.04	89.7366				11.1333	4.95333	5.08344
1	0.8	0.95	Low	139	5	O2	1	65.9933	65.9933	94.82	52.54	56.66	89.9785				13.4533	9.33333	4.84146
1	0.8	0.95	Low	139	5	O2	1	65.9933	65.9933	94.82	47.72	56.08	90.2501				18.2733	9.91333	4.56991
1	0.8	0.95	Low	139	5	O2	1	65.9933	65.9933	94.82	54.08	52.7	90.5272				11.9133	13.2933	4.29282
1	0.8	0.95	Low	139	5	O2	1	65.9933	65.9933	94.82	41.42	47.12	90.7723				24.5733	18.8733	4.04767
1	0.8	0.95	Low	139	5	O2	2	64.885	64.885	94.8967	48.32	58.94	88.0946	8.14957	9.18131	0.934434	16.565	5.945	6.80207
1	0.8	0.95	Low	139	5	O2	2	64.885	64.885	94.8967	28.5	28.6	88.4329				36.385	36.285	6.46379
1	0.8	0.95	Low	139	5	O2	2	64.885	64.885	94.8967	54.3	51.7	88.7295				10.585	13.185	6.16714
1	0.8	0.95	Low	139	5	O2	2	64.885	64.885	94.8967	42.26	53.06	89.0169				22.625	11.825	5.87976
1	0.8	0.95	Low	139	5	O2	2	64.885	64.885	94.8967	47.3	53.5	89.3274				17.585	11.385	5.56923
1	0.8	0.95	Low	139	5	O2	2	64.885	64.885	94.8967	36.26	58.14	89.6442				28.625	6.745	5.25252
1	0.8	0.95	Low	139	5	O2	2	64.885	64.885	94.8967	46.02	58.74	89.9358				18.865	6.145	4.9609
1	0.8	0.95	Low	139	5	O2	2	64.885	64.885	94.8967	53.26	51.18	90.2893				11.625	13.705	4.60733
1	0.8	0.95	Low	139	5	O2	2	64.885	64.885	94.8967	52.9	58.2	90.562				11.985	6.685	4.33471
1	0.8	0.95	Low	139	5	O2	2	64.885	64.885	94.8967	48.62	59.04	90.8881				16.265	5.845	4.00852
1	0.8	0.95	Low	139	5	O2	3	63.6867	63.6867	94.8967	54.5333	48.6167	87.792	5.55208	3.53312	1.78092	9.15333	15.07	7.10462
1	0.8	0.95	Low	139	5	O2	3	63.6867	63.6867	94.8967	42.4167	56.5	88.348				21.27	7.18667	6.54868
1	0.8	0.95	Low	139	5	O2	3	63.6867	63.6867	94.8967	53.5	51.8833	88.9118				10.1867	11.8033	5.98489
1	0.8	0.95	Low	139	5	O2	3	63.6867	63.6867	94.8967	44.9833	49.6167	89.5523				18.7033	14.07	5.34435
1	0.8	0.95	Low	139	5	O2	3	63.6867	63.6867	94.8967	47.3167	51.6167	90.1093				16.37	12.07	4.78734
1	0.8	0.95	Low	139	5	O2	3	63.6867	63.6867	94.8967	51.55	48.6833	90.6792				12.1367	15.0033	4.2175
1	0.8	0.95	Low	139	5	O2	3	63.6867	63.6867	94.8967	49.1333	50.0667	91.2402				14.5533	13.62	3.6565
1	0.8	0.95	Low	139	5	O2	3	63.6867	63.6867	94.8967	52.8167	53.1167	91.8559				10.87	10.57	3.04075
1	0.8	0.95	Low	139	5	O2	3	63.6867	63.6867	94.8967	47.3	50.1833	92.4565				16.3867	13.5033	2.44019
1	0.8	0.95	Low	139	5	O2	3	63.6867	63.6867	94.8967	36.7667	42.8333	93.1171				26.92	20.8533	1.77954
1	0.8	0.95	Low	139	5	O3	1	120.858	120.858	154.833	101.7	125.1	148.881	21.1637	3.73268	0.405987	19.1575	4.2425	5.95184
1	0.8	0.95	Low	139	5	O3	1	120.858	120.858	154.833	40.4	113	149.016				80.4575	7.8575	5.81728
1	0.8	0.95	Low	139	5	O3	1	120.858	120.858	154.833	101.5	123.5	149.126				19.3575	2.6425	5.7075
1	0.8	0.95	Low	139	5	O3	1	120.858	120.858	154.833	110.5	124.2	149.301				10.3575	3.3425	5.53203
1	0.8	0.95	Low	139	5	O3	1	120.858	120.858	154.833	107	124.6	149.403				13.8575	3.7425	5.43067
1	0.8	0.95	Low	139	5	O3	1	120.858	120.858	154.833	100.5	119.7	149.617				20.3575	1.1575	5.21679
1	0.8	0.95	Low	139	5	O3	1	120.858	120.858	154.833	101.6	123	149.791				19.2575	2.1425	5.04207
1	0.8	0.95	Low	139	5	O3	1	120.858	120.858	154.833	107.2	125.5	149.818				13.6575	4.6425	5.0153
1	0.8	0.95	Low	139	5	O3	1	120.858	120.858	154.833	112.5	124	149.818				8.3575	3.1425	5.0153
1	0.8	0.95	Low	139	5	O3	1	120.858	120.858	154.833	85.8	121.6	150.115				35.0575	0.7425	4.71827
1	0.8	0.95	Low	139	5	O3	2	119.83	119.83	155.667	112.9	124	146.657	6.98144	5.01003	0.807215	6.93	4.17	9.00974
1	0.8	0.95	Low	139	5	O3	2	119.83	119.83	155.667	113.7	121.8	147.193				6.13	1.97	8.47385
1	0.8	0.95	Low	139	5	O3	2	119.83	119.83	155.667	112.1	122.3	145.85				7.73	2.47	9.81692
1	0.8	0.95	Low	139	5	O3	2	119.83	119.83	155.667	102.1	122.4	148.069				17.73	2.57	7.59744
1	0.8	0.95	Low	139	5	O3	2	119.83	119.83	155.667	96.9	124.7	146.657				22.93	4.87	9.00974
1	0.8	0.95	Low	139	5	O3	2	119.83	119.83	155.667	108.9	107.3	147.193				10.93	12.53	8.47385
1	0.8	0.95	Low	139	5	O3	2	119.83	119.83	155.667	95.3	120.7	147.386				24.53	0.87	8.28103
1	0.8	0.95	Low	139	5	O3	2	119.83	119.83	155.667	101.6	123.2	147.386				18.23	3.37	8.28103
1	0.8	0.95	Low	139	5	O3	2	119.83	119.83	155.667	112.5	123.5	148.069				7.33	3.67	7.59744
1	0.8	0.95	Low	139	5	O3	2	119.83	119.83	155.667	102.5	121.5	148.609				17.33	1.67	7.05769
1	0.8	0.95	Low	139	5	O3	3	121.557	121.557	154.25	110.6	118.6	148.251	5.74651	8.61358	0.536017	10.9567	2.95667	5.99927
1	0.8	0.95	Low	139	5	O3	3	121.557	121.557	154.25	100.3	94.2	148.464				21.2567	27.3567	5.78586
1	0.8	0.95	Low	139	5	O3	3	121.557	121.557	154.25	110.2	124.7	148.599				11.3567	3.14333	5.65137
1	0.8	0.95	Low	139	5	O3	3	121.557	121.557	154.25	93.5	112.1	148.772				28.0567	9.45667	5.47837
1	0.8	0.95	Low	139	5	O3	3	121.557	121.557	154.25	110.9	119.8	148.973				10.6567	1.75667	5.27719
1	0.8	0.95	Low	139	5	O3	3	121.557	121.557	154.25	106	112.4	149.159				15.5567	9.15667	5.09125
1	0.8	0.95	Low	139	5	O3	3	121.557	121.557	154.25	110.6	122.9	149.338				10.9567	1.34333	4.91247
1	0.8	0.95	Low	139	5	O3	3	121.557	121.557	154.25	110.2	114.3	149.476				11.3567	7.25667	4.77412
1	0.8	0.95	Low	139	5	O3	3	121.557	121.557	154.25	104.9	117.7	149.676				16.6567	3.85667	4.57425
1	0.8	0.95	Low	139	5	O3	3	121.557	121.557	154.25	109.1	119.9	149.856				12.4567	1.65667	4.39407
1	0.8	0.85	Low	46	10	O1	1	98.14	72.7333	47.4933	99.3	71.8667	43.7785	5.11507	6.05388	4.81218	1.16	0.866667	3.71487
1	0.8	0.85	Low	46	10	O1	1	98.14	72.7333	47.4933	100.9	51.9	45.3805				2.76	20.8333	2.11284
1	0.8	0.85	Low	46	10	O1	1	98.14	72.7333	47.4933	89.7	63.1	46.9843				8.44	9.63333	0.509057
1	0.8	0.85	Low	46	10	O1	1	98.14	72.7333	47.4933	98.5667	55.4	48.6239				0.426667	17.3333	1.13059
1	0.8	0.85	Low	46	10	O1	1	98.14	72.7333	47.4933	88.9333	62.5	50.1539				9.20667	10.2333	2.66062
1	0.8	0.85	Low	46	10	O1	1	98.14	72.7333	47.4933	100.533	63.1	51.6086				2.39333	9.63333	4.11531
1	0.8	0.85	Low	46	10	O1	1	98.14	72.7333	47.4933	98.4333	52.3333	53.3775				0.293333	20.4	5.88413
1	0.8	0.85	Low	46	10	O1	1	98.14	72.7333	47.4933	97.3	62.7333	55.0532				0.84	10	7.55983
1	0.8	0.85	Low	46	10	O1	1	98.14	72.7333	47.4933	87.3	57.9	56.2195				10.84	14.8333	8.7262
1	0.8	0.85	Low	46	10	O1	1	98.14	72.7333	47.4933	96.9667	57.4667	58.2481				1.17333	15.2667	10.7547
1	0.8	0.85	Low	46	10	O1	2	98.2033	72.8067	47.03	70.5667	69.6667	42.1909	9.24149	4.95405	3.97745	27.6367	3.14	4.83912
1	0.8	0.85	Low	46	10	O1	2	98.2033	72.8067	47.03	100.633	63.4	43.5188				2.43	9.40667	3.51122
1	0.8	0.85	Low	46	10	O1	2	98.2033	72.8067	47.03	100.833	71.0667	44.7731				2.63	1.74	2.25689
1	0.8	0.85	Low	46	10	O1	2	98.2033	72.8067	47.03	97.3333	57.8333	46.049				0.87	14.9733	0.980974
1	0.8	0.85	Low	46	10	O1	2	98.2033	72.8067	47.03	99.5	62.3667	47.3978				1.29667	10.44	0.367752
1	0.8	0.85	Low	46	10	O1	2	98.2033	72.8067	47.03	99.9333	66.6	48.6317				1.73	6.20667	1.60166
1	0.8	0.85	Low	46	10	O1	2	98.2033	72.8067	47.03	96.1	63.1	49.7568				2.10333	9.70667	2.72684
1	0.8	0.85	Low	46	10	O1	2	98.2033	72.8067	47.03	100.5	75.2	51.2781				2.29667	2.39333	4.24812
1	0.8	0.85	Low	46	10	O1	2	98.2033	72.8067	47.03	99.5667	65.0667	52.6411				1.36333	7.74	5.6111
1	0.8	0.85	Low	46	10	O1	2	98.2033	72.8067	47.03	100.133	67	54.1821				1.93	5.80667	7.15211
1	0.8	0.85	Low	46	10	O1	3	98.1133	72.7433	46.27	98.6	63.55	42.2445	5.7318	4.66287	3.92959	0.486667	9.19333	4.02546
1	0.8	0.85	Low	46	10	O1	3	98.1133	72.7433	46.27	100.725	75.9	43.6216				2.61167	3.15667	2.64844
1	0.8	0.85	Low	46	10	O1	3	98.1133	72.7433	46.27	99.8	71.725	44.8326				1.68667	1.01833	1.43741
1	0.8	0.85	Low	46	10	O1	3	98.1133	72.7433	46.27	100.75	74.925	46.1034				2.63667	2.18167	0.166588
1	0.8	0.85	Low	46	10	O1	3	98.1133	72.7433	46.27	97.6	76.9	47.4405				0.513333	4.15667	1.17053
1	0.8	0.85	Low	46	10	O1	3	98.1133	72.7433	46.27	97.675	77.125	48.738				0.438333	4.38167	2.46802
1	0.8	0.85	Low	46	10	O1	3	98.1133	72.7433	46.27	98.15	71.725	49.9557				0.0366667	1.01833	3.68572
1	0.8	0.85	Low	46	10	O1	3	98.1133	72.7433	46.27	99.6	76.875	51.4004				1.48667	4.13167	5.13043
1	0.8	0.85	Low	46	10	O1	3	98.1133	72.7433	46.27	83.825	66.7	52.6604				14.2883	6.04333	6.39038
1	0.8	0.85	Low	46	10	O1	3	98.1133	72.7433	46.27	88.2	75.025	53.9305				9.91333	2.28167	7.6605
1	0.8	0.85	Low	46	10	O2	1	65.9933	65.9933	94.82	44.84	57.48	86.4688	5.93471	3.56217	2.79232	21.1533	8.51333	8.35119
1	0.8	0.85	Low	46	10	O2	1	65.9933	65.9933	94.82	42.52	58.12	87.254				23.4733	7.87333	7.56604
1	0.8	0.85	Low	46	10	O2	1	65.9933	65.9933	94.82	45.14	48.26	88.2332				20.8533	17.7333	6.58678
1	0.8	0.85	Low	46	10	O2	1	65.9933	65.9933	94.82	54.48	52.54	89.0775				11.5133	13.4533	5.7425
1	0.8	0.85	Low	46	10	O2	1	65.9933	65.9933	94.82	47.94	55.32	90.0696				18.0533	10.6733	4.75036
1	0.8	0.85	Low	46	10	O2	1	65.9933	65.9933	94.82	39.84	51.56	91.0636				26.1533	14.4333	3.75636
1	0.8	0.85	Low	46	10	O2	1	65.9933	65.9933	94.82	47.16	56.02	91.9695				18.8333	9.97333	2.85048
1	0.8	0.85	Low	46	10	O2	1	65.9933	65.9933	94.82	57.28	53.64	92.8554				8.71333	12.3533	1.96464
1	0.8	0.85	Low	46	10	O2	1	65.9933	65.9933	94.82	38.42	53.92	93.7147				27.5733	12.0733	1.10532
1	0.8	0.85	Low	46	10	O2	1	65.9933	65.9933	94.82	48.66	47.58	94.7068				17.3333	18.4133	0.113194
1	0.8	0.85	Low	46	10	O2	2	64.885	64.885	94.8967	35.375	38.65	85.7297	8.33552	7.71937	3.04948	29.51	26.235	9.167
1	0.8	0.85	Low	46	10	O2	2	64.885	64.885	94.8967	50.575	44.275	86.6981				14.31	20.61	8.19855
1	0.8	0.85	Low	46	10	O2	2	64.885	64.885	94.8967	41.45	40.075	87.7569				23.435	24.81	7.13976
1	0.8	0.85	Low	46	10	O2	2	64.885	64.885	94.8967	34.9	43.35	88.6454				29.985	21.535	6.25127
1	0.8	0.85	Low	46	10	O2	2	64.885	64.885	94.8967	23.95	31.525	89.7865				40.935	33.36	5.11013
1	0.8	0.85	Low	46	10	O2	2	64.885	64.885	94.8967	22.75	19	90.6873				42.135	45.885	4.20934
1	0.8	0.85	Low	46	10	O2	2	64.885	64.885	94.8967	39.175	41.6	91.7497				25.71	23.285	3.14701
1	0.8	0.85	Low	46	10	O2	2	64.885	64.885	94.8967	43.025	40.525	92.7828				21.86	24.36	2.11387
1	0.8	0.85	Low	46	10	O2	2	64.885	64.885	94.8967	37.975	30.675	93.7574				26.91	34.21	1.13927
1	0.8	0.85	Low	46	10	O2	2	64.885	64.885	94.8967	35.85	38.875	94.7759				29.035	26.01	0.120733
1	0.8	0.85	Low	46	10	O2	3	63.6867	63.6867	94.8967	44.44	43.38	86.4148	11.324	6.94353	3.44055	19.2467	20.3067	8.48183
1	0.8	0.85	Low	46	10	O2	3	63.6867	63.6867	94.8967	47.1	33.38	87.714				16.5867	30.3067	7.18267
1	0.8	0.85	Low	46	10	O2	3	63.6867	63.6867	94.8967	25.4	27.06	88.709				38.2867	36.6267	6.18769
1	0.8	0.85	Low	46	10	O2	3	63.6867	63.6867	94.8967	31.48	29.44	89.777				32.2067	34.2467	5.1197
1	0.8	0.85	Low	46	10	O2	3	63.6867	63.6867	94.8967	16.48	31.32	91.0019				47.2067	32.3667	3.89472
1	0.8	0.85	Low	46	10	O2	3	63.6867	63.6867	94.8967	22.38	24.66	92.1333				41.3067	39.0267	2.76341
1	0.8	0.85	Low	46	10	O2	3	63.6867	63.6867	94.8967	47.38	16.56	93.2004				16.3067	47.1267	1.69628
1	0.8	0.85	Low	46	10	O2	3	63.6867	63.6867	94.8967	35.8	30.96	94.3816				27.8867	32.7267	0.51503
1	0.8	0.85	Low	46	10	O2	3	63.6867	63.6867	94.8967	37.98	32.32	95.4967				25.7067	31.3667	0.600073
1	0.8	0.85	Low	46	10	O2	3	63.6867	63.6867	94.8967	21.2	25.5	96.7729				42.4867	38.1867	1.8762
1	0.8	0.85	Low	46	10	O3	1	120.858	120.858	154.833	70.5	120.8	150.991	16.0472	2.21871	2.65972	50.3575	0.0575	3.84189
1	0.8	0.85	Low	46	10	O3	1	120.858	120.858	154.833	80.8	121.2	152.01				40.0575	0.3425	2.82352
1	0.8	0.85	Low	46	10	O3	1	120.858	120.858	154.833	104.7	118.2	152.881				16.1575	2.6575	1.95202
1	0.8	0.85	Low	46	10	O3	1	120.858	120.858	154.833	58.7	118.5	153.754				62.1575	2.3575	1.07906
1	0.8	0.85	Low	46	10	O3	1	120.858	120.858	154.833	80.7	120.8	154.706				40.1575	0.0575	0.127678
1	0.8	0.85	Low	46	10	O3	1	120.858	120.858	154.833	77	118	155.564				43.8575	2.8575	0.730207
1	0.8	0.85	Low	46	10	O3	1	120.858	120.858	154.833	106.7	114.5	156.439				14.1575	6.3575	1.60607
1	0.8	0.85	Low	46	10	O3	1	120.858	120.858	154.833	91.2	116.9	156.96				29.6575	3.9575	2.12693
1	0.8	0.85	Low	46	10	O3	1	120.858	120.858	154.833	75.1	120.7	158.092				45.7575	0.1575	3.25831
1	0.8	0.85	Low	46	10	O3	1	120.858	120.858	154.833	102.9	116.8	159.094				17.9575	4.0575	4.261
1	0.8	0.85	Low	46	10	O3	2	119.83	119.83	155.667	105	65.5	145.863	15.5967	17.4098	3.42523	14.83	54.33	9.8041
1	0.8	0.85	Low	46	10	O3	2	119.83	119.83	155.667	107.7	100.5	148.186				12.13	19.33	7.48045
1	0.8	0.85	Low	46	10	O3	2	119.83	119.83	155.667	114.7	81	149.345				5.13	38.83	6.32189
1	0.8	0.85	Low	46	10	O3	2	119.83	119.83	155.667	109.4	117.3	150.323				10.43	2.53	5.34317
1	0.8	0.85	Low	46	10	O3	2	119.83	119.83	155.667	72.3	106.3	152.378				47.53	13.53	3.28897
1	0.8	0.85	Low	46	10	O3	2	119.83	119.83	155.667	82.9	113	153.644				36.93	6.83	2.02232
1	0.8	0.85	Low	46	10	O3	2	119.83	119.83	155.667	111.4	102	155.132				8.43	17.83	0.535116
1	0.8	0.85	Low	46	10	O3	2	119.83	119.83	155.667	103.3	114.9	156.284				16.53	4.93	0.617322
1	0.8	0.85	Low	46	10	O3	2	119.83	119.83	155.667	90.1	115.6	153.644				29.73	4.23	2.02232
1	0.8	0.85	Low	46	10	O3	2	119.83	119.83	155.667	76	117.7	155.132				43.83	2.13	0.535116
1	0.8	0.85	Low	46	10	O3	3	121.557	121.557	154.25	67.2	114.3	152.599	27.2115	45.8584	1.04567	54.3567	7.25667	1.65065
1	0.8	0.85	Low	46	10	O3	3	121.557	121.557	154.25	46.6	36.6	152.891				74.9567	84.9567	1.35929
1	0.8	0.85	Low	46	10	O3	3	121.557	121.557	154.25	14.1	7.9	153.221				107.457	113.657	1.02881
1	0.8	0.85	Low	46	10	O3	3	121.557	121.557	154.25	33.9	41	153.52				87.6567	80.5567	0.729501
1	0.8	0.85	Low	46	10	O3	3	121.557	121.557	154.25	25.3	15.1	153.966				96.2567	106.457	0.28423
1	0.8	0.85	Low	46	10	O3	3	121.557	121.557	154.25	26.2	25.5	154.266				95.3567	96.0567	0.0158996
1	0.8	0.85	Low	46	10	O3	3	121.557	121.557	154.25	108.2	109.7	154.607				13.3567	11.8567	0.357177
1	0.8	0.85	Low	46	10	O3	3	121.557	121.557	154.25	63.5	113.9	154.961				58.0567	7.65667	0.710529
1	0.8	0.85	Low	46	10	O3	3	121.557	121.557	154.25	38.1	111.1	155.329				83.4567	10.4567	1.07897
1	0.8	0.85	Low	46	10	O3	3	121.557	121.557	154.25	45.7	101.9	155.67				75.8567	19.6567	1.41995
1	0.8	0.75	Low	28	12	O1	1	98.14	72.7333	47.4933	93.5	55.8	42.9224	9.98504	10.6829	4.23197	4.64	16.9333	4.57098
1	0.8	0.75	Low	28	12	O1	1	98.14	72.7333	47.4933	95	58.1667	44.2812				3.14	14.5667	3.21209
1	0.8	0.75	Low	28	12	O1	1	98.14	72.7333	47.4933	92.6667	36.7667	45.6729				5.47333	35.9667	1.82046
1	0.8	0.75	Low	28	12	O1	1	98.14	72.7333	47.4933	94.6667	51.3333	47.0657				3.47333	21.4	0.427683
1	0.8	0.75	Low	28	12	O1	1	98.14	72.7333	47.4933	95.5333	54.1333	48.3665				2.60667	18.6	0.87313
1	0.8	0.75	Low	28	12	O1	1	98.14	72.7333	47.4933	92.7667	44.9667	49.8756				5.37333	27.7667	2.38226
1	0.8	0.75	Low	28	12	O1	1	98.14	72.7333	47.4933	90.9667	45.1	51.2265				7.17333	27.6333	3.73315
1	0.8	0.75	Low	28	12	O1	1	98.14	72.7333	47.4933	93.4	42.4667	52.9076				4.74	30.2667	5.41427
1	0.8	0.75	Low	28	12	O1	1	98.14	72.7333	47.4933	93.6333	46.8333	54.0429				4.50667	25.9	6.54957
1	0.8	0.75	Low	28	12	O1	1	98.14	72.7333	47.4933	62.2667	21.7333	55.3755				35.8733	51	7.88212
1	0.8	0.75	Low	28	12	O1	2	98.2033	72.8067	47.03	89.8333	58.5333	41.9989	15.3581	8.53706	3.90426	8.37	14.2733	5.03107
1	0.8	0.75	Low	28	12	O1	2	98.2033	72.8067	47.03	93.2667	50	43.3321				4.93667	22.8067	3.6979
1	0.8	0.75	Low	28	12	O1	2	98.2033	72.8067	47.03	63.2333	56.7333	44.608				34.97	16.0733	2.42203
1	0.8	0.75	Low	28	12	O1	2	98.2033	72.8067	47.03	64.0333	37.2667	45.8931				34.17	35.54	1.13695
1	0.8	0.75	Low	28	12	O1	2	98.2033	72.8067	47.03	62.8667	48.1333	47.1535				35.3367	24.6733	0.123501
1	0.8	0.75	Low	28	12	O1	2	98.2033	72.8067	47.03	93.4	34.4667	48.3924				4.80333	38.34	1.36242
1	0.8	0.75	Low	28	12	O1	2	98.2033	72.8067	47.03	93.4333	58.0333	49.6862				4.77	14.7733	2.65621
1	0.8	0.75	Low	28	12	O1	2	98.2033	72.8067	47.03	90.2	43.3333	50.8925				8.00333	29.4733	3.86251
1	0.8	0.75	Low	28	12	O1	2	98.2033	72.8067	47.03	91.5	44.7333	52.346				6.70333	28.0733	5.316
1	0.8	0.75	Low	28	12	O1	2	98.2033	72.8067	47.03	59.4	41.8333	53.7323				38.8033	30.9733	6.70233
1	0.8	0.75	Low	28	12	O1	3	98.1133	72.7433	46.27	91.7	59.85	42.9304	18.7179	7.36985	4.3135	6.41333	12.8933	3.33961
1	0.8	0.75	Low	28	12	O1	3	98.1133	72.7433	46.27	70.25	53.925	44.4835				27.8633	18.8183	1.7865
1	0.8	0.75	Low	28	12	O1	3	98.1133	72.7433	46.27	91.325	50.75	45.7835				6.78833	21.9933	0.486529
1	0.8	0.75	Low	28	12	O1	3	98.1133	72.7433	46.27	92.775	48.65	47.2119				5.33833	24.0933	0.941865
1	0.8	0.75	Low	28	12	O1	3	98.1133	72.7433	46.27	86.55	59.9	48.7548				11.5633	12.8433	2.48484
1	0.8	0.75	Low	28	12	O1	3	98.1133	72.7433	46.27	62.05	68.6	50.1694				36.0633	4.14333	3.89941
1	0.8	0.75	Low	28	12	O1	3	98.1133	72.7433	46.27	81.2	63.725	51.5942				16.9133	9.01833	5.32419
1	0.8	0.75	Low	28	12	O1	3	98.1133	72.7433	46.27	92.325	46.275	52.9233				5.78833	26.4683	6.6533
1	0.8	0.75	Low	28	12	O1	3	98.1133	72.7433	46.27	35.625	60.8	54.3541				62.4883	11.9433	8.08413
1	0.8	0.75	Low	28	12	O1	3	98.1133	72.7433	46.27	92	64	55.786				6.11333	8.74333	9.51605
1	0.8	0.75	Low	28	12	O2	1	65.9933	65.9933	94.82	26.125	50.325	85.124	4.97013	8.02146	2.79402	39.8683	15.6683	9.69605
1	0.8	0.75	Low	28	12	O2	1	65.9933	65.9933	94.82	21.825	55.525	86.1169				44.1683	10.4683	8.70306
1	0.8	0.75	Low	28	12	O2	1	65.9933	65.9933	94.82	32.65	44.975	86.9988				33.3433	21.0183	7.82119
1	0.8	0.75	Low	28	12	O2	1	65.9933	65.9933	94.82	24.55	30.85	88.1462				41.4433	35.1433	6.67379
1	0.8	0.75	Low	28	12	O2	1	65.9933	65.9933	94.82	31.5	47.45	88.8162				34.4933	18.5433	6.00384
1	0.8	0.75	Low	28	12	O2	1	65.9933	65.9933	94.82	26.225	39.325	89.8994				39.7683	26.6683	4.9206
1	0.8	0.75	Low	28	12	O2	1	65.9933	65.9933	94.82	26.85	39.125	90.7139				39.1433	26.8683	4.1061
1	0.8	0.75	Low	28	12	O2	1	65.9933	65.9933	94.82	30.475	47.625	91.5738				35.5183	18.3683	3.24619
1	0.8	0.75	Low	28	12	O2	1	65.9933	65.9933	94.82	18.85	39.825	92.6084				47.1433	26.1683	2.21163
1	0.8	0.75	Low	28	12	O2	1	65.9933	65.9933	94.82	18.45	31.225	93.4683				47.5433	34.7683	1.3517
1	0.8	0.75	Low	28	12	O2	2	64.885	64.885	94.8967	24.7333	19.7	86.2074	10.2544	6.9861	3.31082	40.1517	45.185	8.68924
1	0.8	0.75	Low	28	12	O2	2	64.885	64.885	94.8967	26.8	34.7667	87.1929				38.085	30.1183	7.7038
1	0.8	0.75	Low	28	12	O2	2	64.885	64.885	94.8967	45.6667	13.2	88.383				19.2183	51.685	6.51364
1	0.8	0.75	Low	28	12	O2	2	64.885	64.885	94.8967	12.5667	19.9333	89.4769				52.3183	44.9517	5.41974
1	0.8	0.75	Low	28	12	O2	2	64.885	64.885	94.8967	39.3333	32.6667	90.4469				25.5517	32.2183	4.44979
1	0.8	0.75	Low	28	12	O2	2	64.885	64.885	94.8967	21.4667	27.7667	91.5371				43.4183	37.1183	3.35952
1	0.8	0.75	Low	28	12	O2	2	64.885	64.885	94.8967	30.6333	27.7333	92.78				34.2517	37.1517	2.11666
1	0.8	0.75	Low	28	12	O2	2	64.885	64.885	94.8967	27.6667	18.2667	93.8858				37.2183	46.6183	1.01085
1	0.8	0.75	Low	28	12	O2	2	64.885	64.885	94.8967	17.9667	19.8	95.0237				46.9183	45.085	0.127007
1	0.8	0.75	Low	28	12	O2	2	64.885	64.885	94.8967	16.4667	19.2333	95.8793				48.4183	45.6517	0.982672
1	0.8	0.75	Low	28	12	O2	3	63.6867	63.6867	94.8967	46.55	35	85.9355	9.88885	4.83908	3.12947	17.1367	28.6867	8.96112
1	0.8	0.75	Low	28	12	O2	3	63.6867	63.6867	94.8967	41.6	46.6	86.9412				22.0867	17.0867	7.95542
1	0.8	0.75	Low	28	12	O2	3	63.6867	63.6867	94.8967	53.2	39.35	88.0359				10.4867	24.3367	6.86078
1	0.8	0.75	Low	28	12	O2	3	63.6867	63.6867	94.8967	38	37.25	88.9332				25.6867	26.4367	5.96348
1	0.8	0.75	Low	28	12	O2	3	63.6867	63.6867	94.8967	56.85	48.25	90.0155				6.83667	15.4367	4.88119
1	0.8	0.75	Low	28	12	O2	3	63.6867	63.6867	94.8967	47.2	34.6	91.0383				16.4867	29.0867	3.85833
1	0.8	0.75	Low	28	12	O2	3	63.6867	63.6867	94.8967	51.2	41.75	92.0299				12.4867	21.9367	2.86677
1	0.8	0.75	Low	28	12	O2	3	63.6867	63.6867	94.8967	33.6	42.6	93.0963				30.0867	21.0867	1.80038
1	0.8	0.75	Low	28	12	O2	3	63.6867	63.6867	94.8967	28.3	41.6	94.2471				35.3867	22.0867	0.649533
1	0.8	0.75	Low	28	12	O2	3	63.6867	63.6867	94.8967	30.5	35	95.243				33.1867	28.6867	0.346373
1	0.8	0.75	Low	28	12	O3	1	120.858	120.858	154.833	44.7	103.6	147.542	21.6487	38.4976	1.85215	76.1575	17.2575	7.29096
1	0.8	0.75	Low	28	12	O3	1	120.858	120.858	154.833	0.4	1.3	147.542				120.457	119.558	7.29096
1	0.8	0.75	Low	28	12	O3	1	120.858	120.858	154.833	35.9	103.3	147.885				84.9575	17.5575	6.94853
1	0.8	0.75	Low	28	12	O3	1	120.858	120.858	154.833	0	105	149.224				120.858	15.8575	5.60979
1	0.8	0.75	Low	28	12	O3	1	120.858	120.858	154.833	46.3	102.1	149.702				74.5575	18.7575	5.13161
1	0.8	0.75	Low	28	12	O3	1	120.858	120.858	154.833	72.4	105.5	150.244				48.4575	15.3575	4.58907
1	0.8	0.75	Low	28	12	O3	1	120.858	120.858	154.833	37.7	94.5	150.982				83.1575	26.3575	3.85141
1	0.8	0.75	Low	28	12	O3	1	120.858	120.858	154.833	33.7	98.4	151.613				87.1575	22.4575	3.22056
1	0.8	0.75	Low	28	12	O3	1	120.858	120.858	154.833	21	20.7	150.982				99.8575	100.157	3.85141
1	0.8	0.75	Low	28	12	O3	1	120.858	120.858	154.833	26.9	97.9	153.032				93.9575	22.9575	1.80087
1	0.8	0.75	Low	28	12	O3	2	119.83	119.83	155.667	21.6	14.6	139.534	32.2252	31.1516	2.46586	98.23	105.23	16.1328
1	0.8	0.75	Low	28	12	O3	2	119.83	119.83	155.667	23.1	15.1	144.05				96.73	104.73	11.6164
1	0.8	0.75	Low	28	12	O3	2	119.83	119.83	155.667	24.4	49.9	145.263				95.43	69.93	10.4036
1	0.8	0.75	Low	28	12	O3	2	119.83	119.83	155.667	63.5	58.9	142.302				56.33	60.93	13.3651
1	0.8	0.75	Low	28	12	O3	2	119.83	119.83	155.667	15.8	39.6	143.416				104.03	80.23	12.2502
1	0.8	0.75	Low	28	12	O3	2	119.83	119.83	155.667	108.4	37.9	144.05				11.43	81.93	11.6164
1	0.8	0.75	Low	28	12	O3	2	119.83	119.83	155.667	34.9	51.4	145.263				84.93	68.43	10.4036
1	0.8	0.75	Low	28	12	O3	2	119.83	119.83	155.667	39.5	25.1	146.131				80.33	94.73	9.53613
1	0.8	0.75	Low	28	12	O3	2	119.83	119.83	155.667	33	112.5	147.039				86.83	7.33	8.62765
1	0.8	0.75	Low	28	12	O3	2	119.83	119.83	155.667	94.1	87.5	148.158				25.73	32.33	7.50821
1	0.8	0.75	Low	28	12	O3	3	121.557	121.557	154.25	94.4	98.1	149.395	20.5396	27.9844	1.95429	27.1567	23.4567	4.85477
1	0.8	0.75	Low	28	12	O3	3	121.557	121.557	154.25	72.5	105	150.022				49.0567	16.5567	4.22778
1	0.8	0.75	Low	28	12	O3	3	121.557	121.557	154.25	47.1	99.2	150.744				74.4567	22.3567	3.5062
1	0.8	0.75	Low	28	12	O3	3	121.557	121.557	154.25	78.3	105	151.368				43.2567	16.5567	2.88198
1	0.8	0.75	Low	28	12	O3	3	121.557	121.557	154.25	49.2	96.8	151.934				72.3567	24.7567	2.31626
1	0.8	0.75	Low	28	12	O3	3	121.557	121.557	154.25	105.7	98.7	152.693				15.8567	22.8567	1.55695
1	0.8	0.75	Low	28	12	O3	3	121.557	121.557	154.25	59.5	109.3	153.284				62.0567	12.2567	0.965964
1	0.8	0.75	Low	28	12	O3	3	121.557	121.557	154.25	97.1	16	153.929				24.4567	105.557	0.320914
1	0.8	0.75	Low	28	12	O3	3	121.557	121.557	154.25	58.6	111.6	154.542				62.9567	9.95667	0.292266
1	0.8	0.75	Low	28	12	O3	3	121.557	121.557	154.25	80	104.3	155.219				41.5567	17.2567	0.96889
1	0.67	0.95	Low	84	8	O1	1	98.14	72.7333	47.4933	97.9	63.7667	42.1093	0.649416	6.62055	3.99318	0.24	8.96667	5.38407
1	0.67	0.95	Low	84	8	O1	1	98.14	72.7333	47.4933	97.5667	60.4	43.5174				0.573333	12.3333	3.97591
1	0.67	0.95	Low	84	8	O1	1	98.14	72.7333	47.4933	97.7333	60.4667	44.8204				0.406667	12.2667	2.67298
1	0.67	0.95	Low	84	8	O1	1	98.14	72.7333	47.4933	98.0333	67.1	46.0625				0.106667	5.63333	1.43087
1	0.67	0.95	Low	84	8	O1	1	98.14	72.7333	47.4933	96.6667	60.5333	47.4337				1.47333	12.2	0.0596173
1	0.67	0.95	Low	84	8	O1	1	98.14	72.7333	47.4933	98.0667	69.0667	48.7038				0.0733333	3.66667	1.21052
1	0.67	0.95	Low	84	8	O1	1	98.14	72.7333	47.4933	97.4	59.9667	49.8703				0.74	12.7667	2.37695
1	0.67	0.95	Low	84	8	O1	1	98.14	72.7333	47.4933	96.5	46.4	51.1541				1.64	26.3333	3.66074
1	0.67	0.95	Low	84	8	O1	1	98.14	72.7333	47.4933	96.3333	69.1	52.5901				1.80667	3.63333	5.09673
1	0.67	0.95	Low	84	8	O1	1	98.14	72.7333	47.4933	97.0333	58.4333	54.2889				1.10667	14.3	6.79556
1	0.67	0.95	Low	84	8	O1	2	98.2033	72.8067	47.03	94.1333	50.5	41.7682	8.48202	9.33356	3.42318	4.07	22.3067	5.26179
1	0.67	0.95	Low	84	8	O1	2	98.2033	72.8067	47.03	93.4667	49.6333	42.8254				4.73667	23.1733	4.20462
1	0.67	0.95	Low	84	8	O1	2	98.2033	72.8067	47.03	69.9333	42.7	44.289				28.27	30.1067	2.74102
1	0.67	0.95	Low	84	8	O1	2	98.2033	72.8067	47.03	91.8333	56.2	45.4437				6.37	16.6067	1.58633
1	0.67	0.95	Low	84	8	O1	2	98.2033	72.8067	47.03	91.9667	59.7667	46.4299				6.23667	13.04	0.600072
1	0.67	0.95	Low	84	8	O1	2	98.2033	72.8067	47.03	87.9333	61.8333	47.6334				10.27	10.9733	0.603443
1	0.67	0.95	Low	84	8	O1	2	98.2033	72.8067	47.03	84.0667	67.9667	49.1207				14.1367	4.84	2.09069
1	0.67	0.95	Low	84	8	O1	2	98.2033	72.8067	47.03	83.0667	44.3333	50.5354				15.1367	28.4733	3.50544
1	0.67	0.95	Low	84	8	O1	2	98.2033	72.8067	47.03	72.4667	64.7333	51.5467				25.7367	8.07333	4.51666
1	0.67	0.95	Low	84	8	O1	2	98.2033	72.8067	47.03	86.7333	67.6333	50.5354				11.47	5.17333	3.50544
1	0.67	0.95	Low	84	8	O1	3	98.1133	72.7433	46.27	100.425	46.95	39.3444	11.8606	10.3711	2.59005	2.31167	25.7933	6.92564
1	0.67	0.95	Low	84	8	O1	3	98.1133	72.7433	46.27	63.2	64.325	40.2208				34.9133	8.41833	6.04922
1	0.67	0.95	Low	84	8	O1	3	98.1133	72.7433	46.27	99.425	63.65	41.0896				1.31167	9.09333	5.18043
1	0.67	0.95	Low	84	8	O1	3	98.1133	72.7433	46.27	98.775	63.85	41.9113				0.661667	8.89333	4.35868
1	0.67	0.95	Low	84	8	O1	3	98.1133	72.7433	46.27	97.625	55.2	42.776				0.488333	17.5433	3.494
1	0.67	0.95	Low	84	8	O1	3	98.1133	72.7433	46.27	103.45	77.175	43.6214				5.33667	4.43167	2.64855
1	0.67	0.95	Low	84	8	O1	3	98.1133	72.7433	46.27	104.225	82.35	44.6805				6.11167	9.60667	1.58947
1	0.67	0.95	Low	84	8	O1	3	98.1133	72.7433	46.27	99.4	64.025	45.3151				1.28667	8.71833	0.954942
1	0.67	0.95	Low	84	8	O1	3	98.1133	72.7433	46.27	98.775	74.625	46.3357				0.661667	1.88167	0.0656607
1	0.67	0.95	Low	84	8	O1	3	98.1133	72.7433	46.27	98.8	68.25	46.897				0.686667	4.49333	0.62697
1	0.67	0.95	Low	84	8	O2	1	65.9933	65.9933	94.82	57.6833	55.6667	86.5571	6.52384	2.80644	3.52838	8.31	10.3267	8.26288
1	0.67	0.95	Low	84	8	O2	1	65.9933	65.9933	94.82	59.0333	58.35	87.7177				6.96	7.64333	7.10227
1	0.67	0.95	Low	84	8	O2	1	65.9933	65.9933	94.82	55.35	54.6833	89.0183				10.6433	11.31	5.80172
1	0.67	0.95	Low	84	8	O2	1	65.9933	65.9933	94.82	48.6333	52.3167	90.0703				17.36	13.6767	4.74968
1	0.67	0.95	Low	84	8	O2	1	65.9933	65.9933	94.82	57.4333	57.65	91.2757				8.56	8.34333	3.54429
1	0.67	0.95	Low	84	8	O2	1	65.9933	65.9933	94.82	45.6667	53.45	92.3721				20.3267	12.5433	2.44786
1	0.67	0.95	Low	84	8	O2	1	65.9933	65.9933	94.82	55.1167	49.5333	93.5931				10.8767	16.46	1.22691
1	0.67	0.95	Low	84	8	O2	1	65.9933	65.9933	94.82	46.0667	50.9833	94.79				19.9267	15.01	0.0300216
1	0.67	0.95	Low	84	8	O2	1	65.9933	65.9933	94.82	50.6833	52.1833	95.9326				15.31	13.81	1.11261
1	0.67	0.95	Low	84	8	O2	1	65.9933	65.9933	94.82	39.15	54.1333	97.0287				26.8433	11.86	2.20873
1	0.67	0.95	Low	84	8	O2	2	64.885	64.885	94.8967	59.2833	49.1333	88.1795	3.88762	2.8695	3.86367	5.60167	15.7517	6.7172
1	0.67	0.95	Low	84	8	O2	2	64.885	64.885	94.8967	49.8	49.7667	89.3813				15.085	15.1183	5.51539
1	0.67	0.95	Low	84	8	O2	2	64.885	64.885	94.8967	50.95	53.8667	90.4857				13.935	11.0183	4.41102
1	0.67	0.95	Low	84	8	O2	2	64.885	64.885	94.8967	53.4667	48.8167	91.9409				11.4183	16.0683	2.95577
1	0.67	0.95	Low	84	8	O2	2	64.885	64.885	94.8967	57.1667	49.0167	93.3141				7.71833	15.8683	1.58254
1	0.67	0.95	Low	84	8	O2	2	64.885	64.885	94.8967	54.8833	51.1667	94.6122				10.0017	13.7183	0.284508
1	0.67	0.95	Low	84	8	O2	2	64.885	64.885	94.8967	49.6	45.8	95.7161				15.285	19.085	0.819468
1	0.67	0.95	Low	84	8	O2	2	64.885	64.885	94.8967	52.4667	52.3167	97.084				12.4183	12.5683	2.18731
1	0.67	0.95	Low	84	8	O2	2	64.885	64.885	94.8967	45.9167	46.95	98.3289				18.9683	17.935	3.4322
1	0.67	0.95	Low	84	8	O2	2	64.885	64.885	94.8967	53.1833	54.75	99.5416				11.7017	10.135	4.64496
1	0.67	0.95	Low	84	8	O2	3	63.6867	63.6867	94.8967	46.8167	52.1833	88.3886	3.81017	3.23486	4.60863	16.87	11.5033	6.50803
1	0.67	0.95	Low	84	8	O2	3	63.6867	63.6867	94.8967	43.7667	41.8833	89.8842				19.92	21.8033	5.01242
1	0.67	0.95	Low	84	8	O2	3	63.6867	63.6867	94.8967	48.6	43.4167	91.5138				15.0867	20.27	3.38283
1	0.67	0.95	Low	84	8	O2	3	63.6867	63.6867	94.8967	51.15	46.1333	93.1088				12.5367	17.5533	1.78792
1	0.67	0.95	Low	84	8	O2	3	63.6867	63.6867	94.8967	42.3833	47.3667	94.529				21.3033	16.32	0.367649
1	0.67	0.95	Low	84	8	O2	3	63.6867	63.6867	94.8967	46.6667	49.0667	95.7699				17.02	14.62	0.873211
1	0.67	0.95	Low	84	8	O2	3	63.6867	63.6867	94.8967	49.6667	48.6333	97.2578				14.02	15.0533	2.36115
1	0.67	0.95	Low	84	8	O2	3	63.6867	63.6867	94.8967	54.6167	48.5833	99.0987				9.07	15.1033	4.20204
1	0.67	0.95	Low	84	8	O2	3	63.6867	63.6867	94.8967	46.8	42.8	100.714				16.8867	20.8867	5.81725
1	0.67	0.95	Low	84	8	O2	3	63.6867	63.6867	94.8967	43.1167	45.4833	102.124				20.57	18.2033	7.22752
1	0.67	0.95	Low	84	8	O3	1	120.858	120.858	154.833	108	118.4	152.957	21.6366	0.718022	2.15234	12.8575	2.4575	1.87585
1	0.67	0.95	Low	84	8	O3	1	120.858	120.858	154.833	90.4	117.2	153.884				30.4575	3.6575	0.949627
1	0.67	0.95	Low	84	8	O3	1	120.858	120.858	154.833	100.8	117.2	154.824				20.0575	3.6575	0.00900854
1	0.67	0.95	Low	84	8	O3	1	120.858	120.858	154.833	36.8	116	155.76				84.0575	4.8575	0.926961
1	0.67	0.95	Low	84	8	O3	1	120.858	120.858	154.833	73.5	117.6	156.497				47.3575	3.2575	1.66407
1	0.67	0.95	Low	84	8	O3	1	120.858	120.858	154.833	93	117.7	157.557				27.8575	3.1575	2.72395
1	0.67	0.95	Low	84	8	O3	1	120.858	120.858	154.833	101.5	117.2	159.062				19.3575	3.6575	4.22851
1	0.67	0.95	Low	84	8	O3	1	120.858	120.858	154.833	99.8	118.1	159.856				21.0575	2.7575	5.023
1	0.67	0.95	Low	84	8	O3	1	120.858	120.858	154.833	95	118.4	155.76				25.8575	2.4575	0.926961
1	0.67	0.95	Low	84	8	O3	1	120.858	120.858	154.833	110.4	117.2	156.497				10.4575	3.6575	1.66407
1	0.67	0.95	Low	84	8	O3	2	119.83	119.83	155.667	83.3	117.3	132.839	15.343	12.2553	4.2454	36.53	2.53	22.8277
1	0.67	0.95	Low	84	8	O3	2	119.83	119.83	155.667	87.2	78.2	135.871				32.63	41.63	19.7957
1	0.67	0.95	Low	84	8	O3	2	119.83	119.83	155.667	106.7	116.3	135.871				13.13	3.53	19.7957
1	0.67	0.95	Low	84	8	O3	2	119.83	119.83	155.667	108.3	117.2	137.379				11.53	2.63	18.2876
1	0.67	0.95	Low	84	8	O3	2	119.83	119.83	155.667	112.9	118	138.338				6.93	1.83	17.3288
1	0.67	0.95	Low	84	8	O3	2	119.83	119.83	155.667	102.7	113.6	140.505				17.13	6.23	15.1616
1	0.67	0.95	Low	84	8	O3	2	119.83	119.83	155.667	65.6	119.1	141.845				54.23	0.73	13.8217
1	0.67	0.95	Low	84	8	O3	2	119.83	119.83	155.667	88.7	108.8	143.033				31.13	11.03	12.6332
1	0.67	0.95	Low	84	8	O3	2	119.83	119.83	155.667	84	114.9	144.56				35.83	4.93	11.1062
1	0.67	0.95	Low	84	8	O3	2	119.83	119.83	155.667	77.3	117.3	145.917				42.53	2.53	9.74919
1	0.67	0.95	Low	84	8	O3	3	121.557	121.557	154.25	115.2	116.5	149.996	11.7939	3.4638	0.807091	6.35667	5.05667	4.25417
1	0.67	0.95	Low	84	8	O3	3	121.557	121.557	154.25	105.9	113.7	149.996				15.6567	7.85667	4.25417
1	0.67	0.95	Low	84	8	O3	3	121.557	121.557	154.25	85	114.1	150.383				36.5567	7.45667	3.8668
1	0.67	0.95	Low	84	8	O3	3	121.557	121.557	154.25	104.7	107.5	150.602				16.8567	14.0567	3.64821
1	0.67	0.95	Low	84	8	O3	3	121.557	121.557	154.25	115.6	119.2	150.889				5.95667	2.35667	3.36062
1	0.67	0.95	Low	84	8	O3	3	121.557	121.557	154.25	106.2	117.6	151.113				15.3567	3.95667	3.13739
1	0.67	0.95	Low	84	8	O3	3	121.557	121.557	154.25	113.8	116.9	151.374				7.75667	4.65667	2.8759
1	0.67	0.95	Low	84	8	O3	3	121.557	121.557	154.25	105.3	118.8	151.724				16.2567	2.75667	2.52572
1	0.67	0.95	Low	84	8	O3	3	121.557	121.557	154.25	88	112.9	152.087				33.5567	8.65667	2.16341
1	0.67	0.95	Low	84	8	O3	3	121.557	121.557	154.25	87.1	116.1	152.204				34.4567	5.45667	2.04575
1	0.67	0.75	Low	17	13	O1	1	98.14	72.7333	47.4933	95.375	26.5	55.5972	9.96741	5.43869	0.311458	2.765	46.2333	8.10388
1	0.67	0.75	Low	17	13	O1	1	98.14	72.7333	47.4933	73.15	31.725	55.5972				24.99	41.0083	8.10388
1	0.67	0.75	Low	17	13	O1	1	98.14	72.7333	47.4933	87.35	29.25	55.8198				10.79	43.4833	8.32651
1	0.67	0.75	Low	17	13	O1	1	98.14	72.7333	47.4933	75.225	32.1	55.9231				22.915	40.6333	8.42979
1	0.67	0.75	Low	17	13	O1	1	98.14	72.7333	47.4933	100	41.625	56.0127				1.86	31.1083	8.51932
1	0.67	0.75	Low	17	13	O1	1	98.14	72.7333	47.4933	89.375	34.5	56.1507				8.765	38.2333	8.6574
1	0.67	0.75	Low	17	13	O1	1	98.14	72.7333	47.4933	73.725	36.15	56.1507				24.415	36.5833	8.6574
1	0.67	0.75	Low	17	13	O1	1	98.14	72.7333	47.4933	87.625	40.475	56.337				10.515	32.2583	8.84363
1	0.67	0.75	Low	17	13	O1	1	98.14	72.7333	47.4933	97.825	42.3	56.4309				0.315	30.4333	8.93756
1	0.67	0.75	Low	17	13	O1	1	98.14	72.7333	47.4933	92.025	31.15	56.4309				6.115	41.5833	8.93756
1	0.67	0.75	Low	17	13	O1	2	98.2033	72.8067	47.03	96.9333	49.9	37.5781	15.754	6.20889	1.59721	1.27	22.9067	9.45191
1	0.67	0.75	Low	17	13	O1	2	98.2033	72.8067	47.03	65.8333	39.6	38.114				32.37	33.2067	8.91597
1	0.67	0.75	Low	17	13	O1	2	98.2033	72.8067	47.03	95.1	45.4667	38.114				3.10333	27.34	8.91597
1	0.67	0.75	Low	17	13	O1	2	98.2033	72.8067	47.03	66.7	28.1667	39.1478				31.5033	44.64	7.88225
1	0.67	0.75	Low	17	13	O1	2	98.2033	72.8067	47.03	66.1667	35.5333	39.6743				32.0367	37.2733	7.35569
1	0.67	0.75	Low	17	13	O1	2	98.2033	72.8067	47.03	94.5333	35.4	40.1699				3.67	37.4067	6.86006
1	0.67	0.75	Low	17	13	O1	2	98.2033	72.8067	47.03	97.1667	41.4	40.8946				1.03667	31.4067	6.13536
1	0.67	0.75	Low	17	13	O1	2	98.2033	72.8067	47.03	65.8	36.9667	41.1602				32.4033	35.84	5.86981
1	0.67	0.75	Low	17	13	O1	2	98.2033	72.8067	47.03	65.2667	34.2333	41.6731				32.9367	38.5733	5.35687
1	0.67	0.75	Low	17	13	O1	2	98.2033	72.8067	47.03	95.2667	42.3333	42.0893				2.93667	30.4733	4.94074
1	0.67	0.75	Low	17	13	O1	3	98.1133	72.7433	46.27	51.775	18.275	38.4274	19.565	11.1787	1.9868	46.3383	54.4683	7.84264
1	0.67	0.75	Low	17	13	O1	3	98.1133	72.7433	46.27	105.825	37.175	39.1055				7.71167	35.5683	7.16451
1	0.67	0.75	Low	17	13	O1	3	98.1133	72.7433	46.27	81.75	29.325	39.6777				16.3633	43.4183	6.5923
1	0.67	0.75	Low	17	13	O1	3	98.1133	72.7433	46.27	101.05	33.525	40.3933				2.93667	39.2183	5.87675
1	0.67	0.75	Low	17	13	O1	3	98.1133	72.7433	46.27	76.525	47.575	41.1498				21.5883	25.1683	5.12024
1	0.67	0.75	Low	17	13	O1	3	98.1133	72.7433	46.27	96.95	58.45	41.874				1.16333	14.2933	4.39597
1	0.67	0.75	Low	17	13	O1	3	98.1133	72.7433	46.27	98.175	44.25	42.4037				0.0616667	28.4933	3.86626
1	0.67	0.75	Low	17	13	O1	3	98.1133	72.7433	46.27	53.35	38.55	42.9648				44.7633	34.1933	3.30519
1	0.67	0.75	Low	17	13	O1	3	98.1133	72.7433	46.27	99.3	47.25	43.6939				1.18667	25.4933	2.57607
1	0.67	0.75	Low	17	13	O1	3	98.1133	72.7433	46.27	77.9	44.3	44.3051				20.2133	28.4433	1.9649
1	0.67	0.75	Low	17	13	O2	1	65.9933	65.9933	94.82	32.0333	28.7667	84.3189	14.6671	5.06533	2.44585	33.96	37.2267	10.5011
1	0.67	0.75	Low	17	13	O2	1	65.9933	65.9933	94.82	20.5333	28.5	85.161				45.46	37.4933	9.65902
1	0.67	0.75	Low	17	13	O2	1	65.9933	65.9933	94.82	18.1	30.9667	85.8678				47.8933	35.0267	8.95219
1	0.67	0.75	Low	17	13	O2	1	65.9933	65.9933	94.82	13.4	31.6333	86.7438				52.5933	34.36	8.07625
1	0.67	0.75	Low	17	13	O2	1	65.9933	65.9933	94.82	17.4	35.7667	87.5851				48.5933	30.2267	7.23488
1	0.67	0.75	Low	17	13	O2	1	65.9933	65.9933	94.82	15.2667	38.5333	88.3649				50.7267	27.46	6.45515
1	0.67	0.75	Low	17	13	O2	1	65.9933	65.9933	94.82	28.9333	24.4333	89.198				37.06	41.56	5.62202
1	0.67	0.75	Low	17	13	O2	1	65.9933	65.9933	94.82	52.4333	38.5667	89.974				13.56	27.4267	4.84595
1	0.67	0.75	Low	17	13	O2	1	65.9933	65.9933	94.82	50.5333	26.2333	90.8735				15.46	39.76	3.9465
1	0.67	0.75	Low	17	13	O2	1	65.9933	65.9933	94.82	41.5333	36.0667	91.4969				24.46	29.9267	3.32312
1	0.67	0.75	Low	17	13	O2	2	64.885	64.885	94.8967	26.75	45.8	85.5301	7.37797	8.34426	3.03168	38.135	19.085	9.36661
1	0.67	0.75	Low	17	13	O2	2	64.885	64.885	94.8967	11.5	31.5	86.5194				53.385	33.385	8.37731
1	0.67	0.75	Low	17	13	O2	2	64.885	64.885	94.8967	35.15	46.1	87.56				29.735	18.785	7.33664
1	0.67	0.75	Low	17	13	O2	2	64.885	64.885	94.8967	28.85	31.5	88.5369				36.035	33.385	6.35981
1	0.67	0.75	Low	17	13	O2	2	64.885	64.885	94.8967	27.7	42.95	89.6629				37.185	21.935	5.23376
1	0.67	0.75	Low	17	13	O2	2	64.885	64.885	94.8967	32.6	33.3	90.5077				32.285	31.585	4.38892
1	0.67	0.75	Low	17	13	O2	2	64.885	64.885	94.8967	24.8	42.75	91.6298				40.085	22.135	3.26685
1	0.67	0.75	Low	17	13	O2	2	64.885	64.885	94.8967	25.05	35	92.6139				39.835	29.885	2.28277
1	0.67	0.75	Low	17	13	O2	2	64.885	64.885	94.8967	27.85	57.6	93.5337				37.035	7.285	1.36296
1	0.67	0.75	Low	17	13	O2	2	64.885	64.885	94.8967	14.25	36	94.4965				50.635	28.885	0.400212
1	0.67	0.75	Low	17	13	O2	3	63.6867	63.6867	94.8967	79.3	35.4	86.1691	20.0022	8.94571	2.69804	15.6133	28.2867	8.7276
1	0.67	0.75	Low	17	13	O2	3	63.6867	63.6867	94.8967	35.9	41.5	87.1307				27.7867	22.1867	7.76594
1	0.67	0.75	Low	17	13	O2	3	63.6867	63.6867	94.8967	59.9	48.7	87.9519				3.78667	14.9867	6.94475
1	0.67	0.75	Low	17	13	O2	3	63.6867	63.6867	94.8967	54.15	41.6	89.1262				9.53667	22.0867	5.77051
1	0.67	0.75	Low	17	13	O2	3	63.6867	63.6867	94.8967	36.6	50.8	90.1004				27.0867	12.8867	4.79626
1	0.67	0.75	Low	17	13	O2	3	63.6867	63.6867	94.8967	34.7	46.7	90.6565				28.9867	16.9867	4.24012
1	0.67	0.75	Low	17	13	O2	3	63.6867	63.6867	94.8967	49.7	47.65	91.2505				13.9867	16.0367	3.64612
1	0.67	0.75	Low	17	13	O2	3	63.6867	63.6867	94.8967	34.2	33.1	92.5822				29.4867	30.5867	2.31451
1	0.67	0.75	Low	17	13	O2	3	63.6867	63.6867	94.8967	3.25	21.25	93.3696				60.4367	42.4367	1.52705
1	0.67	0.75	Low	17	13	O2	3	63.6867	63.6867	94.8967	39.65	38.55	94.2785				24.0367	25.1367	0.618203
1	0.67	0.75	Low	17	13	O3	1	120.858	120.858	154.833	73.7	77.8	133.267	31.7243	37.6219	3.32945	47.1575	43.0575	21.566
1	0.67	0.75	Low	17	13	O3	1	120.858	120.858	154.833	34.2	1.3	134.123				86.6575	119.558	20.7104
1	0.67	0.75	Low	17	13	O3	1	120.858	120.858	154.833	0	1.2	135.241				120.858	119.657	19.5928
1	0.67	0.75	Low	17	13	O3	1	120.858	120.858	154.833	69.2	81.4	136.819				51.6575	39.4575	18.0144
1	0.67	0.75	Low	17	13	O3	1	120.858	120.858	154.833	5.6	0.7	137.529				115.258	120.157	17.3044
1	0.67	0.75	Low	17	13	O3	1	120.858	120.858	154.833	71.3	79	138.537				49.5575	41.8575	16.2961
1	0.67	0.75	Low	17	13	O3	1	120.858	120.858	154.833	33.4	3.3	139.83				87.4575	117.558	15.0034
1	0.67	0.75	Low	17	13	O3	1	120.858	120.858	154.833	1.6	0.4	140.932				119.258	120.457	13.9018
1	0.67	0.75	Low	17	13	O3	1	120.858	120.858	154.833	1.3	2.8	141.846				119.558	118.058	12.9872
1	0.67	0.75	Low	17	13	O3	1	120.858	120.858	154.833	2.5	1.2	143.122				118.358	119.657	11.7111
1	0.67	0.75	Low	17	13	O3	2	119.83	119.83	155.667	1.1	4.9	137.15	2.06193	1.51716	1.61147	118.73	114.93	18.5166
1	0.67	0.75	Low	17	13	O3	2	119.83	119.83	155.667	0	1.2	137.564				119.83	118.63	18.103
1	0.67	0.75	Low	17	13	O3	2	119.83	119.83	155.667	2.4	3.7	138.19				117.43	116.13	17.4763
1	0.67	0.75	Low	17	13	O3	2	119.83	119.83	155.667	2.5	2.3	138.628				117.33	117.53	17.0388
1	0.67	0.75	Low	17	13	O3	2	119.83	119.83	155.667	0.1	1.7	139.374				119.73	118.13	16.2927
1	0.67	0.75	Low	17	13	O3	2	119.83	119.83	155.667	0.1	1.2	139.862				119.73	118.63	15.805
1	0.67	0.75	Low	17	13	O3	2	119.83	119.83	155.667	6.4	0.1	140.363				113.43	119.73	15.3041
1	0.67	0.75	Low	17	13	O3	2	119.83	119.83	155.667	1.3	4	140.363				118.53	115.83	15.3041
1	0.67	0.75	Low	17	13	O3	2	119.83	119.83	155.667	3.6	2.4	141.461				116.23	117.43	14.2061
1	0.67	0.75	Low	17	13	O3	2	119.83	119.83	155.667	3.9	3.7	141.979				115.93	116.13	13.6874
1	0.67	0.75	Low	17	13	O3	3	121.557	121.557	154.25	0	1.6	145.407	11.0748	13.6848	1.80273	121.557	119.957	8.84329
1	0.67	0.75	Low	17	13	O3	3	121.557	121.557	154.25	0	1.2	146.584				121.557	120.357	7.66606
1	0.67	0.75	Low	17	13	O3	3	121.557	121.557	154.25	1.3	4.8	146.584				120.257	116.757	7.66606
1	0.67	0.75	Low	17	13	O3	3	121.557	121.557	154.25	1.2	1.2	147.064				120.357	120.357	7.18644
1	0.67	0.75	Low	17	13	O3	3	121.557	121.557	154.25	5.1	2.5	147.544				116.457	119.057	6.70578
1	0.67	0.75	Low	17	13	O3	3	121.557	121.557	154.25	2.4	0.1	148.246				119.157	121.457	6.00394
1	0.67	0.75	Low	17	13	O3	3	121.557	121.557	154.25	3.6	1.2	148.829				117.957	120.357	5.42096
1	0.67	0.75	Low	17	13	O3	3	121.557	121.557	154.25	36.7	45.1	149.848				84.8567	76.4567	4.40243
1	0.67	0.75	Low	17	13	O3	3	121.557	121.557	154.25	1.4	7.2	150.289				120.157	114.357	3.96069
1	0.67	0.75	Low	17	13	O3	3	121.557	121.557	154.25	3.6	1.3	150.861				117.957	120.257	3.38931
3	0.9	0.95	High	556	1	O1	1	98.14	72.7333	47.4933	95.1333	68.2	43.9517	0.276865	2.22028	0.635815	3.00667	4.53333	3.54167
3	0.9	0.95	High	556	1	O1	1	98.14	72.7333	47.4933	95.2333	66.5	44.1709				2.90667	6.23333	3.32245
3	0.9	0.95	High	556	1	O1	1	98.14	72.7333	47.4933	94.6	66.6667	44.3765				3.54	6.06667	3.11684
3	0.9	0.95	High	556	1	O1	1	98.14	72.7333	47.4933	95.0333	67.9333	44.5841				3.10667	4.8	2.90926
3	0.9	0.95	High	556	1	O1	1	98.14	72.7333	47.4933	95.3333	70.9333	44.7964				2.80667	1.8	2.69694
3	0.9	0.95	High	556	1	O1	1	98.14	72.7333	47.4933	94.9333	68	45.0035				3.20667	4.73333	2.4898
3	0.9	0.95	High	556	1	O1	1	98.14	72.7333	47.4933	95.1667	71.8667	45.2086				2.97333	0.866667	2.28473
3	0.9	0.95	High	556	1	O1	1	98.14	72.7333	47.4933	95.6	66.3333	45.427				2.54	6.4	2.06634
3	0.9	0.95	High	556	1	O1	1	98.14	72.7333	47.4933	95.4333	69.5	45.6356				2.70667	3.23333	1.85778
3	0.9	0.95	High	556	1	O1	1	98.14	72.7333	47.4933	95.2333	72.3	45.8477				2.90667	0.433333	1.64567
3	0.9	0.95	High	556	1	O1	2	98.2033	72.8067	47.03	95.1333	69.8	45.0132	0.334885	1.61141	0.226091	3.07	3.00667	2.0168
3	0.9	0.95	High	556	1	O1	2	98.2033	72.8067	47.03	94.8667	71.3667	45.0901				3.33667	1.44	1.93994
3	0.9	0.95	High	556	1	O1	2	98.2033	72.8067	47.03	94.4	71.6333	45.1623				3.80333	1.17333	1.8677
3	0.9	0.95	High	556	1	O1	2	98.2033	72.8067	47.03	94.8	72.9	45.2379				3.40333	0.0933333	1.79209
3	0.9	0.95	High	556	1	O1	2	98.2033	72.8067	47.03	94.6333	70	45.3119				3.57	2.80667	1.71811
3	0.9	0.95	High	556	1	O1	2	98.2033	72.8067	47.03	94.6333	73.6667	45.3871				3.57	0.86	1.64288
3	0.9	0.95	High	556	1	O1	2	98.2033	72.8067	47.03	94.5	68.6333	45.4625				3.70333	4.17333	1.56751
3	0.9	0.95	High	556	1	O1	2	98.2033	72.8067	47.03	94.5	72.3667	45.5356				3.70333	0.44	1.4944
3	0.9	0.95	High	556	1	O1	2	98.2033	72.8067	47.03	93.8667	72.8	45.6117				4.33667	0.00666667	1.4183
3	0.9	0.95	High	556	1	O1	2	98.2033	72.8067	47.03	94.4667	70.4667	45.6859				3.73667	2.34	1.34408
3	0.9	0.95	High	556	1	O1	3	98.1133	72.7433	46.27	95.1	72.6	40.3751	3.91846	6.0157	0.366689	3.01333	0.143333	5.89486
3	0.9	0.95	High	556	1	O1	3	98.1133	72.7433	46.27	95.3	70.3333	40.4958				2.81333	2.41	5.7742
3	0.9	0.95	High	556	1	O1	3	98.1133	72.7433	46.27	95.4333	74.3667	40.6156				2.68	1.62333	5.65442
3	0.9	0.95	High	556	1	O1	3	98.1133	72.7433	46.27	99.9333	84.6	40.7361				1.82	11.8567	5.53388
3	0.9	0.95	High	556	1	O1	3	98.1133	72.7433	46.27	94.8667	76.2667	40.8541				3.24667	3.52333	5.4159
3	0.9	0.95	High	556	1	O1	3	98.1133	72.7433	46.27	99.6667	80.2	40.9809				1.55333	7.45667	5.28906
3	0.9	0.95	High	556	1	O1	3	98.1133	72.7433	46.27	100.267	80.9667	41.1046				2.15333	8.22333	5.16539
3	0.9	0.95	High	556	1	O1	3	98.1133	72.7433	46.27	107	90.5	41.2237				8.88667	17.7567	5.0463
3	0.9	0.95	High	556	1	O1	3	98.1133	72.7433	46.27	95.3	76.3667	41.3398				2.81333	3.62333	4.93019
3	0.9	0.95	High	556	1	O1	3	98.1133	72.7433	46.27	95.4667	75.6	41.4643				2.64667	2.85667	4.80572
3	0.9	0.95	High	556	1	O2	1	65.9933	65.9933	94.82	61.8667	62.7	85.1944	0.169285	0.405932	0.380509	4.12667	3.29333	9.62561
3	0.9	0.95	High	556	1	O2	1	65.9933	65.9933	94.82	61.9667	62.9	85.3266				4.02667	3.09333	9.49342
3	0.9	0.95	High	556	1	O2	1	65.9933	65.9933	94.82	61.9667	62.6	85.4508				4.02667	3.39333	9.3692
3	0.9	0.95	High	556	1	O2	1	65.9933	65.9933	94.82	61.65	63.05	85.5639				4.34333	2.94333	9.25607
3	0.9	0.95	High	556	1	O2	1	65.9933	65.9933	94.82	62.2	62.4	85.7039				3.79333	3.59333	9.11611
3	0.9	0.95	High	556	1	O2	1	65.9933	65.9933	94.82	62.0667	61.6833	85.8216				3.92667	4.31	8.99835
3	0.9	0.95	High	556	1	O2	1	65.9933	65.9933	94.82	61.8	62.5667	85.9526				4.19333	3.42667	8.86742
3	0.9	0.95	High	556	1	O2	1	65.9933	65.9933	94.82	62.1167	62.0667	86.0718				3.87667	3.92667	8.74823
3	0.9	0.95	High	556	1	O2	1	65.9933	65.9933	94.82	61.8	62.3833	86.2029				4.19333	3.61	8.61711
3	0.9	0.95	High	556	1	O2	1	65.9933	65.9933	94.82	61.8167	62.1667	86.3291				4.17667	3.82667	8.49086
3	0.9	0.95	High	556	1	O2	2	64.885	64.885	94.8967	59.8167	59.4667	89.3778	0.555544	0.415071	0.220966	5.06833	5.41833	5.51889
3	0.9	0.95	High	556	1	O2	2	64.885	64.885	94.8967	60.7833	60.2167	89.4507				4.10167	4.66833	5.44594
3	0.9	0.95	High	556	1	O2	2	64.885	64.885	94.8967	60.4333	60.2833	89.534				4.45167	4.60167	5.36262
3	0.9	0.95	High	556	1	O2	2	64.885	64.885	94.8967	61.4667	59.8833	89.6035				3.41833	5.00167	5.29314
3	0.9	0.95	High	556	1	O2	2	64.885	64.885	94.8967	60.2167	59.6333	89.6659				4.66833	5.25167	5.23076
3	0.9	0.95	High	556	1	O2	2	64.885	64.885	94.8967	60.9833	59.6167	89.7468				3.90167	5.26833	5.14989
3	0.9	0.95	High	556	1	O2	2	64.885	64.885	94.8967	61.2	60.25	89.821				3.685	4.635	5.07565
3	0.9	0.95	High	556	1	O2	2	64.885	64.885	94.8967	61.5333	59.8167	89.8923				3.35167	5.06833	5.00436
3	0.9	0.95	High	556	1	O2	2	64.885	64.885	94.8967	61.2	59.9	89.969				3.685	4.985	4.92768
3	0.9	0.95	High	556	1	O2	2	64.885	64.885	94.8967	61	58.9333	90.0319				3.885	5.95167	4.86476
3	0.9	0.95	High	556	1	O2	3	63.6867	63.6867	94.8967	59.3833	57.1333	90.0692	0.423827	0.636408	0.170769	4.30333	6.55333	4.82744
3	0.9	0.95	High	556	1	O2	3	63.6867	63.6867	94.8967	58.95	57.3	90.126				4.73667	6.38667	4.77063
3	0.9	0.95	High	556	1	O2	3	63.6867	63.6867	94.8967	59.7667	56.1833	90.1788				3.92	7.50333	4.71785
3	0.9	0.95	High	556	1	O2	3	63.6867	63.6867	94.8967	59.3333	56.25	90.2335				4.35333	7.43667	4.66321
3	0.9	0.95	High	556	1	O2	3	63.6867	63.6867	94.8967	58.3667	56.6	90.291				5.32	7.08667	4.60569
3	0.9	0.95	High	556	1	O2	3	63.6867	63.6867	94.8967	59.4833	56.3667	90.3523				4.20333	7.32	4.54438
3	0.9	0.95	High	556	1	O2	3	63.6867	63.6867	94.8967	59.5667	56.3167	90.4055				4.12	7.37	4.49114
3	0.9	0.95	High	556	1	O2	3	63.6867	63.6867	94.8967	59.5167	57.7833	90.4642				4.17	5.90333	4.43247
3	0.9	0.95	High	556	1	O2	3	63.6867	63.6867	94.8967	59.5	57.2333	90.5191				4.18667	6.45333	4.37752
3	0.9	0.95	High	556	1	O2	3	63.6867	63.6867	94.8967	59.8	55.75	90.5748				3.88667	7.93667	4.32191
3	0.9	0.95	High	556	1	O3	1	120.858	120.858	154.833	112.5	123.6	149.81	4.23516	0.473873	0.210278	8.3575	2.7425	5.02362
3	0.9	0.95	High	556	1	O3	1	120.858	120.858	154.833	113.3	123.4	149.81				7.5575	2.5425	5.02362
3	0.9	0.95	High	556	1	O3	1	120.858	120.858	154.833	100.5	122.5	149.912				20.3575	1.6425	4.92177
3	0.9	0.95	High	556	1	O3	1	120.858	120.858	154.833	114.1	122.8	150.014				6.7575	1.9425	4.81898
3	0.9	0.95	High	556	1	O3	1	120.858	120.858	154.833	110.8	123.4	150.014				10.0575	2.5425	4.81898
3	0.9	0.95	High	556	1	O3	1	120.858	120.858	154.833	113.7	123.1	150.118				7.1575	2.2425	4.71546
3	0.9	0.95	High	556	1	O3	1	120.858	120.858	154.833	112.7	124	150.219				8.1575	3.1425	4.61481
3	0.9	0.95	High	556	1	O3	1	120.858	120.858	154.833	114	123.1	150.231				6.8575	2.2425	4.60277
3	0.9	0.95	High	556	1	O3	1	120.858	120.858	154.833	114.8	122.6	150.321				6.0575	1.7425	4.51228
3	0.9	0.95	High	556	1	O3	1	120.858	120.858	154.833	114.5	122.8	150.417				6.3575	1.9425	4.41587
3	0.9	0.95	High	556	1	O3	2	119.83	119.83	155.667	115.3	122.5	149.919	0.479467	0.823542	0.128205	4.53	2.67	5.74754
3	0.9	0.95	High	556	1	O3	2	119.83	119.83	155.667	115.3	119.4	149.963				4.53	0.43	5.70383
3	0.9	0.95	High	556	1	O3	2	119.83	119.83	155.667	115	121.1	150.009				4.83	1.27	5.65745
3	0.9	0.95	High	556	1	O3	2	119.83	119.83	155.667	114.3	122.1	150.044				5.53	2.27	5.62239
3	0.9	0.95	High	556	1	O3	2	119.83	119.83	155.667	114.3	121.6	150.092				5.53	1.77	5.57498
3	0.9	0.95	High	556	1	O3	2	119.83	119.83	155.667	114.9	121.3	150.129				4.93	1.47	5.53729
3	0.9	0.95	High	556	1	O3	2	119.83	119.83	155.667	115.2	121.5	150.174				4.63	1.67	5.49315
3	0.9	0.95	High	556	1	O3	2	119.83	119.83	155.667	113.9	121.6	150.215				5.93	1.77	5.45122
3	0.9	0.95	High	556	1	O3	2	119.83	119.83	155.667	115	121.7	150.256				4.83	1.87	5.41075
3	0.9	0.95	High	556	1	O3	2	119.83	119.83	155.667	114.7	121.8	150.305				5.13	1.97	5.36119
3	0.9	0.95	High	556	1	O3	3	121.557	121.557	154.25	113.8	114.7	148.951	3.20252	2.35629	0.257524	7.75667	6.85667	5.29861
3	0.9	0.95	High	556	1	O3	3	121.557	121.557	154.25	115.8	122.3	149.048				5.75667	0.743333	5.20221
3	0.9	0.95	High	556	1	O3	3	121.557	121.557	154.25	105.5	122.3	149.151				16.0567	0.743333	5.0987
3	0.9	0.95	High	556	1	O3	3	121.557	121.557	154.25	115.6	122.3	149.234				5.95667	0.743333	5.01636
3	0.9	0.95	High	556	1	O3	3	121.557	121.557	154.25	116	121.7	149.275				5.55667	0.143333	4.97539
3	0.9	0.95	High	556	1	O3	3	121.557	121.557	154.25	115.6	118.9	149.376				5.95667	2.65667	4.87428
3	0.9	0.95	High	556	1	O3	3	121.557	121.557	154.25	115.2	121.5	149.47				6.35667	0.0566667	4.77979
3	0.9	0.95	High	556	1	O3	3	121.557	121.557	154.25	115.8	121.7	149.567				5.75667	0.143333	4.68268
3	0.9	0.95	High	556	1	O3	3	121.557	121.557	154.25	113.4	120.5	149.637				8.15667	1.05667	4.61344
3	0.9	0.95	High	556	1	O3	3	121.557	121.557	154.25	115.8	120	149.729				5.75667	1.55667	4.52069
3	0.9	0.85	High	185	3	O1	1	98.14	72.7333	47.4933	100.367	69.8	41.8549	1.69094	2.79877	0.97039	2.22667	2.93333	5.63842
3	0.9	0.85	High	185	3	O1	1	98.14	72.7333	47.4933	94.9333	62.4	42.1787				3.20667	10.3333	5.31464
3	0.9	0.85	High	185	3	O1	1	98.14	72.7333	47.4933	94.9	69.4	42.497				3.24	3.33333	4.99636
3	0.9	0.85	High	185	3	O1	1	98.14	72.7333	47.4933	96.1667	70.6667	42.8194				1.97333	2.06667	4.67392
3	0.9	0.85	High	185	3	O1	1	98.14	72.7333	47.4933	95.3333	70.9333	43.1411				2.80667	1.8	4.35219
3	0.9	0.85	High	185	3	O1	1	98.14	72.7333	47.4933	94.9	65.2	43.4644				3.24	7.53333	4.02893
3	0.9	0.85	High	185	3	O1	1	98.14	72.7333	47.4933	94.6	68.0667	43.7857				3.54	4.66667	3.70768
3	0.9	0.85	High	185	3	O1	1	98.14	72.7333	47.4933	95.2667	66.6333	44.0984				2.87333	6.1	3.39494
3	0.9	0.85	High	185	3	O1	1	98.14	72.7333	47.4933	95.1667	64.9333	44.4066				2.97333	7.8	3.08669
3	0.9	0.85	High	185	3	O1	1	98.14	72.7333	47.4933	95.4667	68.5333	44.7503				2.67333	4.2	2.74306
3	0.9	0.85	High	185	3	O1	2	98.2033	72.8067	47.03	94.1	70.7	40.3413	0.513088	1.70433	0.403128	4.10333	2.10667	6.68869
3	0.9	0.85	High	185	3	O1	2	98.2033	72.8067	47.03	94.3667	67.3333	40.4727				3.83667	5.47333	6.55731
3	0.9	0.85	High	185	3	O1	2	98.2033	72.8067	47.03	94.1667	65.9	40.6045				4.03667	6.90667	6.42545
3	0.9	0.85	High	185	3	O1	2	98.2033	72.8067	47.03	94.2	71.1333	40.7398				4.00333	1.67333	6.29019
3	0.9	0.85	High	185	3	O1	2	98.2033	72.8067	47.03	94.8667	69.2333	40.8709				3.33667	3.57333	6.15909
3	0.9	0.85	High	185	3	O1	2	98.2033	72.8067	47.03	95.7	70.5	41.0049				2.50333	2.30667	6.02509
3	0.9	0.85	High	185	3	O1	2	98.2033	72.8067	47.03	94.0333	71.2333	41.1371				4.17	1.57333	5.89292
3	0.9	0.85	High	185	3	O1	2	98.2033	72.8067	47.03	94.6333	69.7667	41.2757				3.57	3.04	5.75425
3	0.9	0.85	High	185	3	O1	2	98.2033	72.8067	47.03	94.2333	69.3667	41.4057				3.97	3.44	5.62434
3	0.9	0.85	High	185	3	O1	2	98.2033	72.8067	47.03	94.8333	69.9667	41.5365				3.37	2.84	5.49351
3	0.9	0.85	High	185	3	O1	3	98.1133	72.7433	46.27	95.1333	73	44.3027	2.82615	4.8471	2.04411	2.98	0.256667	1.96726
3	0.9	0.85	High	185	3	O1	3	98.1133	72.7433	46.27	95.4667	70.2	44.4615				2.64667	2.54333	1.80852
3	0.9	0.85	High	185	3	O1	3	98.1133	72.7433	46.27	94.9	72.4	44.6304				3.21333	0.343333	1.63963
3	0.9	0.85	High	185	3	O1	3	98.1133	72.7433	46.27	95.2667	72.8	44.789				2.84667	0.0566667	1.48101
3	0.9	0.85	High	185	3	O1	3	98.1133	72.7433	46.27	95.2	71.7333	44.9559				2.91333	1.01	1.31412
3	0.9	0.85	High	185	3	O1	3	98.1133	72.7433	46.27	95.2	73.2667	45.1241				2.91333	0.523333	1.14591
3	0.9	0.85	High	185	3	O1	3	98.1133	72.7433	46.27	95.1667	72.7667	45.29				2.94667	0.0233333	0.97999
3	0.9	0.85	High	185	3	O1	3	98.1133	72.7433	46.27	97.5333	76.5333	40.4484				0.58	3.79	5.82155
3	0.9	0.85	High	185	3	O1	3	98.1133	72.7433	46.27	104.1	87.3667	40.6068				5.98667	14.6233	5.66322
3	0.9	0.85	High	185	3	O1	3	98.1133	72.7433	46.27	95.4333	73.1333	40.7674				2.68	0.39	5.50264
3	0.9	0.85	High	185	3	O2	1	65.9933	65.9933	94.82	61.5167	60.3	84.8411	0.40866	1.17456	0.404193	4.47667	5.69333	9.97889
3	0.9	0.85	High	185	3	O2	1	65.9933	65.9933	94.82	61.5167	59.7167	84.9735				4.47667	6.27667	9.84651
3	0.9	0.85	High	185	3	O2	1	65.9933	65.9933	94.82	61.9	60.5	85.1058				4.09333	5.49333	9.71421
3	0.9	0.85	High	185	3	O2	1	65.9933	65.9933	94.82	61.7167	59.4333	85.2447				4.27667	6.56	9.57534
3	0.9	0.85	High	185	3	O2	1	65.9933	65.9933	94.82	61.7	58.8	85.3793				4.29333	7.19333	9.44065
3	0.9	0.85	High	185	3	O2	1	65.9933	65.9933	94.82	61.25	59.0167	85.5067				4.74333	6.97667	9.31335
3	0.9	0.85	High	185	3	O2	1	65.9933	65.9933	94.82	60.9333	60.3667	85.6414				5.06	5.62667	9.17862
3	0.9	0.85	High	185	3	O2	1	65.9933	65.9933	94.82	60.7833	59.9667	85.7746				5.21	6.02667	9.04538
3	0.9	0.85	High	185	3	O2	1	65.9933	65.9933	94.82	60.8167	59.5667	85.9047				5.17667	6.42667	8.91531
3	0.9	0.85	High	185	3	O2	1	65.9933	65.9933	94.82	61.0167	56.4833	86.0463				4.97667	9.51	8.77366
3	0.9	0.85	High	185	3	O2	2	64.885	64.885	94.8967	59.4833	57.3167	89.4179	0.360577	0.985631	0.332863	5.40167	7.56833	5.47875
3	0.9	0.85	High	185	3	O2	2	64.885	64.885	94.8967	60.25	57.1167	89.5248				4.635	7.76833	5.37188
3	0.9	0.85	High	185	3	O2	2	64.885	64.885	94.8967	60.7167	56.6167	89.6372				4.16833	8.26833	5.2595
3	0.9	0.85	High	185	3	O2	2	64.885	64.885	94.8967	60.45	57.1667	89.7435				4.435	7.71833	5.15313
3	0.9	0.85	High	185	3	O2	2	64.885	64.885	94.8967	60.4667	57.7667	89.8549				4.41833	7.11833	5.04176
3	0.9	0.85	High	185	3	O2	2	64.885	64.885	94.8967	60.2667	56.45	89.9648				4.61833	8.435	4.93188
3	0.9	0.85	High	185	3	O2	2	64.885	64.885	94.8967	60.25	56.7167	90.0771				4.635	8.16833	4.81953
3	0.9	0.85	High	185	3	O2	2	64.885	64.885	94.8967	60.1167	56.3333	90.1833				4.76833	8.55167	4.71333
3	0.9	0.85	High	185	3	O2	2	64.885	64.885	94.8967	60.15	54.5667	90.297				4.735	10.3183	4.5997
3	0.9	0.85	High	185	3	O2	2	64.885	64.885	94.8967	60.7667	55.15	90.4061				4.11833	9.735	4.49062
3	0.9	0.85	High	185	3	O2	3	63.6867	63.6867	94.8967	56.1	48.9	89.6665	1.0025	1.20823	0.22535	7.58667	14.7867	5.23021
3	0.9	0.85	High	185	3	O2	3	63.6867	63.6867	94.8967	57.4167	50.8167	89.738				6.27	12.87	5.15871
3	0.9	0.85	High	185	3	O2	3	63.6867	63.6867	94.8967	57.8333	49.9667	89.8139				5.85333	13.72	5.08278
3	0.9	0.85	High	185	3	O2	3	63.6867	63.6867	94.8967	55.9167	51.1667	89.8921				7.77	12.52	5.0046
3	0.9	0.85	High	185	3	O2	3	63.6867	63.6867	94.8967	57.35	50.6833	89.9653				6.33667	13.0033	4.93138
3	0.9	0.85	High	185	3	O2	3	63.6867	63.6867	94.8967	58.5333	49.0833	90.0394				5.15333	14.6033	4.85726
3	0.9	0.85	High	185	3	O2	3	63.6867	63.6867	94.8967	56.05	50.8	90.1141				7.63667	12.8867	4.7826
3	0.9	0.85	High	185	3	O2	3	63.6867	63.6867	94.8967	57.7667	49.6667	90.1863				5.92	14.02	4.71033
3	0.9	0.85	High	185	3	O2	3	63.6867	63.6867	94.8967	58.7	47.6333	90.2628				4.98667	16.0533	4.63391
3	0.9	0.85	High	185	3	O2	3	63.6867	63.6867	94.8967	56.9167	48.2167	90.3336				6.77	15.47	4.56302
3	0.9	0.85	High	185	3	O3	1	120.858	120.858	154.833	114	119.3	148.341	1.06479	1.1961	0.215722	6.8575	1.5575	6.49213
3	0.9	0.85	High	185	3	O3	1	120.858	120.858	154.833	115.1	119.3	148.438				5.7575	1.5575	6.39501
3	0.9	0.85	High	185	3	O3	1	120.858	120.858	154.833	115	118	148.446				5.8575	2.8575	6.38724
3	0.9	0.85	High	185	3	O3	1	120.858	120.858	154.833	115.5	120.1	148.545				5.3575	0.7575	6.28815
3	0.9	0.85	High	185	3	O3	1	120.858	120.858	154.833	114.3	118.4	148.545				6.5575	2.4575	6.28815
3	0.9	0.85	High	185	3	O3	1	120.858	120.858	154.833	114.3	120.9	148.645				6.5575	0.0425	6.18819
3	0.9	0.85	High	185	3	O3	1	120.858	120.858	154.833	112.7	119.7	148.742				8.1575	1.1575	6.09085
3	0.9	0.85	High	185	3	O3	1	120.858	120.858	154.833	116.5	119.8	148.942				4.3575	1.0575	5.8917
3	0.9	0.85	High	185	3	O3	1	120.858	120.858	154.833	115.8	116.7	148.842				5.0575	4.1575	5.99117
3	0.9	0.85	High	185	3	O3	1	120.858	120.858	154.833	115.2	118.6	148.942				5.6575	2.2575	5.8917
3	0.9	0.85	High	185	3	O3	2	119.83	119.83	155.667	114.6	96.6	149.236	0.432692	8.72914	0.223622	5.23	23.23	6.43066
3	0.9	0.85	High	185	3	O3	2	119.83	119.83	155.667	115.5	96	149.329				4.33	23.83	6.33811
3	0.9	0.85	High	185	3	O3	2	119.83	119.83	155.667	114.9	115.8	149.345				4.93	4.03	6.32174
3	0.9	0.85	High	185	3	O3	2	119.83	119.83	155.667	115.2	109.1	149.436				4.63	10.73	6.23057
3	0.9	0.85	High	185	3	O3	2	119.83	119.83	155.667	115.6	118.2	149.523				4.23	1.63	6.14333
3	0.9	0.85	High	185	3	O3	2	119.83	119.83	155.667	114.8	118.6	149.621				5.03	1.23	6.04601
3	0.9	0.85	High	185	3	O3	2	119.83	119.83	155.667	115.6	116.2	149.669				4.23	3.63	5.99744
3	0.9	0.85	High	185	3	O3	2	119.83	119.83	155.667	115	114.5	149.744				4.83	5.33	5.92237
3	0.9	0.85	High	185	3	O3	2	119.83	119.83	155.667	114.3	117.5	149.822				5.53	2.33	5.84506
3	0.9	0.85	High	185	3	O3	2	119.83	119.83	155.667	115	117.8	149.893				4.83	2.03	5.77412
3	0.9	0.85	High	185	3	O3	3	121.557	121.557	154.25	115.3	90.5	148.542	0.513052	8.90419	0.104108	6.25667	31.0567	5.70814
3	0.9	0.85	High	185	3	O3	3	121.557	121.557	154.25	116	119.2	148.582				5.55667	2.35667	5.66769
3	0.9	0.85	High	185	3	O3	3	121.557	121.557	154.25	115.2	111.7	148.6				6.35667	9.85667	5.64992
3	0.9	0.85	High	185	3	O3	3	121.557	121.557	154.25	116	118.2	148.645				5.55667	3.35667	5.6049
3	0.9	0.85	High	185	3	O3	3	121.557	121.557	154.25	114.9	119.1	148.68				6.65667	2.45667	5.56966
3	0.9	0.85	High	185	3	O3	3	121.557	121.557	154.25	116.3	107.6	148.718				5.25667	13.9567	5.53219
3	0.9	0.85	High	185	3	O3	3	121.557	121.557	154.25	115.2	113.5	148.745				6.35667	8.05667	5.5049
3	0.9	0.85	High	185	3	O3	3	121.557	121.557	154.25	116.1	118.3	148.793				5.45667	3.25667	5.4573
3	0.9	0.85	High	185	3	O3	3	121.557	121.557	154.25	115.8	117.2	148.818				5.75667	4.35667	5.43239
3	0.9	0.85	High	185	3	O3	3	121.557	121.557	154.25	116.3	118.4	148.844				5.25667	3.15667	5.40635
3	0.9	0.75	High	111	6	O1	1	98.14	72.7333	47.4933	94.3667	63.1333	38.2834	0.36925	1.42772	1.08705	3.77333	9.6	9.20998
3	0.9	0.75	High	111	6	O1	1	98.14	72.7333	47.4933	95	65.6	38.6375				3.14	7.13333	8.85578
3	0.9	0.75	High	111	6	O1	1	98.14	72.7333	47.4933	94.9667	65.4	39.009				3.17333	7.33333	8.48431
3	0.9	0.75	High	111	6	O1	1	98.14	72.7333	47.4933	94.5333	64.5	39.3603				3.60667	8.23333	8.13307
3	0.9	0.75	High	111	6	O1	1	98.14	72.7333	47.4933	95.0667	66.8667	39.7104				3.07333	5.86667	7.78294
3	0.9	0.75	High	111	6	O1	1	98.14	72.7333	47.4933	95.0667	67.6667	40.0558				3.07333	5.06667	7.43749
3	0.9	0.75	High	111	6	O1	1	98.14	72.7333	47.4933	95	66.6667	40.4212				3.14	6.06667	7.07214
3	0.9	0.75	High	111	6	O1	1	98.14	72.7333	47.4933	95.1333	67.8333	40.7597				3.00667	4.9	6.7336
3	0.9	0.75	High	111	6	O1	1	98.14	72.7333	47.4933	94.4667	65.7667	41.1299				3.67333	6.96667	6.36343
3	0.9	0.75	High	111	6	O1	1	98.14	72.7333	47.4933	95.6	65.8667	41.5612				2.54	6.86667	5.93218
3	0.9	0.75	High	111	6	O1	2	98.2033	72.8067	47.03	114.925	73.4	41.9945	8.33758	5.6171	1.03295	16.7217	0.593333	5.03555
3	0.9	0.75	High	111	6	O1	2	98.2033	72.8067	47.03	110.1	68.9	42.3991				11.8967	3.90667	4.63086
3	0.9	0.75	High	111	6	O1	2	98.2033	72.8067	47.03	114.375	75.4	41.788				16.1717	2.59333	5.24199
3	0.9	0.75	High	111	6	O1	2	98.2033	72.8067	47.03	114.15	78.125	41.1964				15.9467	5.31833	5.83364
3	0.9	0.75	High	111	6	O1	2	98.2033	72.8067	47.03	119.625	81.825	41.6025				21.4217	9.01833	5.42748
3	0.9	0.75	High	111	6	O1	2	98.2033	72.8067	47.03	112.6	76.7	40.0121				14.3967	3.89333	7.01789
3	0.9	0.75	High	111	6	O1	2	98.2033	72.8067	47.03	108.375	72.075	39.3925				10.1717	0.731667	7.63754
3	0.9	0.75	High	111	6	O1	2	98.2033	72.8067	47.03	108.075	75.7	39.8257				9.87167	2.89333	7.20434
3	0.9	0.75	High	111	6	O1	2	98.2033	72.8067	47.03	95.1	63.475	40.2081				3.10333	9.33167	6.82195
3	0.9	0.75	High	111	6	O1	2	98.2033	72.8067	47.03	94.375	66.3	40.5941				3.82833	6.50667	6.43591
3	0.9	0.75	High	111	6	O1	3	98.1133	72.7433	46.27	110.3	76.5	40.6669	6.38709	3.69918	0.444476	12.1867	3.75667	5.60312
3	0.9	0.75	High	111	6	O1	3	98.1133	72.7433	46.27	110.967	77.1	40.0098				12.8533	4.35667	6.26016
3	0.9	0.75	High	111	6	O1	3	98.1133	72.7433	46.27	99.6	71.1667	40.3418				1.48667	1.57667	5.92823
3	0.9	0.75	High	111	6	O1	3	98.1133	72.7433	46.27	95.2	68.1667	40.6908				2.91333	4.57667	5.57924
3	0.9	0.75	High	111	6	O1	3	98.1133	72.7433	46.27	95.6333	69.0333	40.0305				2.48	3.71	6.23953
3	0.9	0.75	High	111	6	O1	3	98.1133	72.7433	46.27	95.4333	68.3	40.3728				2.68	4.44333	5.89723
3	0.9	0.75	High	111	6	O1	3	98.1133	72.7433	46.27	95.6	69.0333	40.7159				2.51333	3.71	5.55405
3	0.9	0.75	High	111	6	O1	3	98.1133	72.7433	46.27	95.1	70.2333	40.0459				3.01333	2.51	6.22413
3	0.9	0.75	High	111	6	O1	3	98.1133	72.7433	46.27	95.3	67.5667	39.3776				2.81333	5.17667	6.89243
3	0.9	0.75	High	111	6	O1	3	98.1133	72.7433	46.27	94.8333	66	39.712				3.28	6.74333	6.55799
3	0.9	0.75	High	111	6	O2	1	65.9933	65.9933	94.82	61.2	57.45	83.4115	1.22859	2.02375	0.436949	4.79333	8.54333	11.4085
3	0.9	0.75	High	111	6	O2	1	65.9933	65.9933	94.82	60.7333	57.6333	83.5523				5.26	8.36	11.2677
3	0.9	0.75	High	111	6	O2	1	65.9933	65.9933	94.82	61.0167	56.5333	83.6982				4.97667	9.46	11.1218
3	0.9	0.75	High	111	6	O2	1	65.9933	65.9933	94.82	59.2667	56.1	83.8399				6.72667	9.89333	10.9801
3	0.9	0.75	High	111	6	O2	1	65.9933	65.9933	94.82	61.45	52.4833	83.9841				4.54333	13.51	10.8359
3	0.9	0.75	High	111	6	O2	1	65.9933	65.9933	94.82	59.9	52.9667	84.1297				6.09333	13.0267	10.6903
3	0.9	0.75	High	111	6	O2	1	65.9933	65.9933	94.82	58.7833	54.3667	84.2703				7.21	11.6267	10.5497
3	0.9	0.75	High	111	6	O2	1	65.9933	65.9933	94.82	58.1833	53.5	84.4214				7.81	12.4933	10.3986
3	0.9	0.75	High	111	6	O2	1	65.9933	65.9933	94.82	60.25	52.9167	84.5658				5.74333	13.0767	10.2542
3	0.9	0.75	High	111	6	O2	1	65.9933	65.9933	94.82	58.2167	53.05	84.7076				7.77667	12.9433	10.1124
3	0.9	0.75	High	111	6	O2	2	64.885	64.885	94.8967	56.3667	53.9667	86.6645	0.827282	2.85797	0.415909	8.51833	10.9183	8.23221
3	0.9	0.75	High	111	6	O2	2	64.885	64.885	94.8967	58.7	51.25	86.7993				6.185	13.635	8.09739
3	0.9	0.75	High	111	6	O2	2	64.885	64.885	94.8967	59.4	53.75	86.9536				5.485	11.135	7.94309
3	0.9	0.75	High	111	6	O2	2	64.885	64.885	94.8967	59.1167	51.9667	87.0819				5.76833	12.9183	7.81472
3	0.9	0.75	High	111	6	O2	2	64.885	64.885	94.8967	58.65	50.3667	87.2226				6.235	14.5183	7.67408
3	0.9	0.75	High	111	6	O2	2	64.885	64.885	94.8967	58.7333	49.55	87.3698				6.15167	15.335	7.52685
3	0.9	0.75	High	111	6	O2	2	64.885	64.885	94.8967	58.5833	47.6	87.4886				6.30167	17.285	7.40809
3	0.9	0.75	High	111	6	O2	2	64.885	64.885	94.8967	58.2833	47.1	87.6288				6.60167	17.785	7.26791
3	0.9	0.75	High	111	6	O2	2	64.885	64.885	94.8967	59	47	87.7657				5.885	17.885	7.13092
3	0.9	0.75	High	111	6	O2	2	64.885	64.885	94.8967	58.4333	46.1333	87.9039				6.45167	18.7517	6.99279
3	0.9	0.75	High	111	6	O2	3	63.6867	63.6867	94.8967	55.6667	44.1	87.25	0.967968	2.29198	0.403231	8.02	19.5867	7.64669
3	0.9	0.75	High	111	6	O2	3	63.6867	63.6867	94.8967	56.0333	47.2833	87.3877				7.65333	16.4033	7.50894
3	0.9	0.75	High	111	6	O2	3	63.6867	63.6867	94.8967	54.7833	41.65	87.5237				8.90333	22.0367	7.37292
3	0.9	0.75	High	111	6	O2	3	63.6867	63.6867	94.8967	55.95	42.9333	87.6591				7.73667	20.7533	7.23761
3	0.9	0.75	High	111	6	O2	3	63.6867	63.6867	94.8967	55.1	40.5333	87.7963				8.58667	23.1533	7.10037
3	0.9	0.75	High	111	6	O2	3	63.6867	63.6867	94.8967	55.25	43.2167	87.9284				8.43667	20.47	6.96825
3	0.9	0.75	High	111	6	O2	3	63.6867	63.6867	94.8967	55.1833	41.6833	88.0545				8.50333	22.0033	6.84216
3	0.9	0.75	High	111	6	O2	3	63.6867	63.6867	94.8967	55.5167	41.3833	88.2002				8.17	22.3033	6.69646
3	0.9	0.75	High	111	6	O2	3	63.6867	63.6867	94.8967	54.55	43.85	88.3179				9.13667	19.8367	6.57876
3	0.9	0.75	High	111	6	O2	3	63.6867	63.6867	94.8967	52.6667	38.9167	88.4456				11.02	24.77	6.45111
3	0.9	0.75	High	111	6	O3	1	120.858	120.858	154.833	116.3	115.7	144.822	0.85531	2.30027	0.213235	4.5575	5.1575	10.0118
3	0.9	0.75	High	111	6	O3	1	120.858	120.858	154.833	115.7	112.1	144.917				5.1575	8.7575	9.9163
3	0.9	0.75	High	111	6	O3	1	120.858	120.858	154.833	117.3	112.6	144.917				3.5575	8.2575	9.9163
3	0.9	0.75	High	111	6	O3	1	120.858	120.858	154.833	116.1	115.7	145.019				4.7575	5.1575	9.81401
3	0.9	0.75	High	111	6	O3	1	120.858	120.858	154.833	116.9	111.7	145.115				3.9575	9.1575	9.71787
3	0.9	0.75	High	111	6	O3	1	120.858	120.858	154.833	116.9	114.7	145.122				3.9575	6.1575	9.71088
3	0.9	0.75	High	111	6	O3	1	120.858	120.858	154.833	115.2	111	145.22				5.6575	9.8575	9.61296
3	0.9	0.75	High	111	6	O3	1	120.858	120.858	154.833	114.6	112.5	145.315				6.2575	8.3575	9.51863
3	0.9	0.75	High	111	6	O3	1	120.858	120.858	154.833	116.9	109	145.42				3.9575	11.8575	9.41303
3	0.9	0.75	High	111	6	O3	1	120.858	120.858	154.833	116.5	115.7	145.42				4.3575	5.1575	9.41303
3	0.9	0.75	High	111	6	O3	2	119.83	119.83	155.667	116.5	108.7	144.018	0.715309	3.65345	0.305071	3.33	11.13	11.6491
3	0.9	0.75	High	111	6	O3	2	119.83	119.83	155.667	116.3	113.3	144.106				3.53	6.53	11.5609
3	0.9	0.75	High	111	6	O3	2	119.83	119.83	155.667	117	113.5	144.22				2.83	6.33	11.447
3	0.9	0.75	High	111	6	O3	2	119.83	119.83	155.667	115.7	112.9	144.322				4.13	6.93	11.3445
3	0.9	0.75	High	111	6	O3	2	119.83	119.83	155.667	117.3	114.1	144.418				2.53	5.73	11.2488
3	0.9	0.75	High	111	6	O3	2	119.83	119.83	155.667	115.7	113.5	144.526				4.13	6.33	11.141
3	0.9	0.75	High	111	6	O3	2	119.83	119.83	155.667	118	102	144.628				1.83	17.83	11.0391
3	0.9	0.75	High	111	6	O3	2	119.83	119.83	155.667	116.9	111.9	144.725				2.93	7.93	10.9421
3	0.9	0.75	High	111	6	O3	2	119.83	119.83	155.667	117	112.9	144.805				2.83	6.93	10.8617
3	0.9	0.75	High	111	6	O3	2	119.83	119.83	155.667	117.1	111.3	144.926				2.73	8.53	10.7405
3	0.9	0.75	High	111	6	O3	3	121.557	121.557	154.25	115.3	113	142.012	0.706242	3.46564	0.316335	6.25667	8.55667	12.2383
3	0.9	0.75	High	111	6	O3	3	121.557	121.557	154.25	116.5	102.6	142.041				5.05667	18.9567	12.2087
3	0.9	0.75	High	111	6	O3	3	121.557	121.557	154.25	115.1	113	142.217				6.45667	8.55667	12.0334
3	0.9	0.75	High	111	6	O3	3	121.557	121.557	154.25	116.1	110.2	142.269				5.45667	11.3567	11.9805
3	0.9	0.75	High	111	6	O3	3	121.557	121.557	154.25	114.4	109	142.413				7.15667	12.5567	11.8374
3	0.9	0.75	High	111	6	O3	3	121.557	121.557	154.25	116.3	108.4	142.466				5.25667	13.1567	11.7837
3	0.9	0.75	High	111	6	O3	3	121.557	121.557	154.25	115.1	114	142.62				6.45667	7.55667	11.6304
3	0.9	0.75	High	111	6	O3	3	121.557	121.557	154.25	116.3	109.2	142.689				5.25667	12.3567	11.5609
3	0.9	0.75	High	111	6	O3	3	121.557	121.557	154.25	116.3	112.2	142.837				5.25667	9.35667	11.4126
3	0.9	0.75	High	111	6	O3	3	121.557	121.557	154.25	115.5	113.6	142.916				6.05667	7.95667	11.3344
3	0.8	0.95	High	278	2	O1	1	98.14	72.7333	47.4933	80.175	43.65	40.453	12.3047	11.7272	0.295278	17.965	29.0833	7.04034
3	0.8	0.95	High	278	2	O1	1	98.14	72.7333	47.4933	99	35.525	40.5526				0.86	37.2083	6.94075
3	0.8	0.95	High	278	2	O1	1	98.14	72.7333	47.4933	115.85	43.575	40.6425				17.71	29.1583	6.85082
3	0.8	0.95	High	278	2	O1	1	98.14	72.7333	47.4933	109.825	42.975	40.7484				11.685	29.7583	6.74496
3	0.8	0.95	High	278	2	O1	1	98.14	72.7333	47.4933	122.675	49.15	40.8406				24.535	23.5833	6.65273
3	0.8	0.95	High	278	2	O1	1	98.14	72.7333	47.4933	113.35	49.15	40.9428				15.21	23.5833	6.55056
3	0.8	0.95	High	278	2	O1	1	98.14	72.7333	47.4933	121.725	74.8	41.0428				23.585	2.06667	6.45052
3	0.8	0.95	High	278	2	O1	1	98.14	72.7333	47.4933	110.9	55.275	41.13				12.76	17.4583	6.36336
3	0.8	0.95	High	278	2	O1	1	98.14	72.7333	47.4933	111.275	63.725	41.2324				13.135	9.00833	6.26097
3	0.8	0.95	High	278	2	O1	1	98.14	72.7333	47.4933	112.6	59.775	41.3318				14.46	12.9583	6.1615
3	0.8	0.95	High	278	2	O1	2	98.2033	72.8067	47.03	135.225	73.675	42.8232	33.4219	10.2284	0.656707	37.0217	0.868333	4.20679
3	0.8	0.95	High	278	2	O1	2	98.2033	72.8067	47.03	104.625	88.075	43.0342				6.42167	15.2683	3.99578
3	0.8	0.95	High	278	2	O1	2	98.2033	72.8067	47.03	46.45	76.75	43.2497				51.7533	3.94333	3.78033
3	0.8	0.95	High	278	2	O1	2	98.2033	72.8067	47.03	47	60.8	43.4681				51.2033	12.0067	3.5619
3	0.8	0.95	High	278	2	O1	2	98.2033	72.8067	47.03	73.125	85.975	43.6867				25.0783	13.1683	3.34333
3	0.8	0.95	High	278	2	O1	2	98.2033	72.8067	47.03	32.9	61.175	43.9041				65.3033	11.6317	3.12587
3	0.8	0.95	High	278	2	O1	2	98.2033	72.8067	47.03	40.55	70.3	44.1286				57.6533	2.50667	2.90136
3	0.8	0.95	High	278	2	O1	2	98.2033	72.8067	47.03	52.25	72.275	44.3411				45.9533	0.531667	2.68889
3	0.8	0.95	High	278	2	O1	2	98.2033	72.8067	47.03	79.05	59	44.5564				19.1533	13.8067	2.47356
3	0.8	0.95	High	278	2	O1	2	98.2033	72.8067	47.03	99.625	79.3	44.765				1.42167	6.49333	2.26496
3	0.8	0.95	High	278	2	O1	3	98.1133	72.7433	46.27	118.5	41.35	40.399	5.48353	7.6087	0.213912	20.3867	31.3933	5.87103
3	0.8	0.95	High	278	2	O1	3	98.1133	72.7433	46.27	105.925	34.225	40.4788				7.81167	38.5183	5.79124
3	0.8	0.95	High	278	2	O1	3	98.1133	72.7433	46.27	114.475	43.75	40.5414				16.3617	28.9933	5.72856
3	0.8	0.95	High	278	2	O1	3	98.1133	72.7433	46.27	108.125	38.975	40.618				10.0117	33.7683	5.65196
3	0.8	0.95	High	278	2	O1	3	98.1133	72.7433	46.27	101.475	40.3	40.6757				3.36167	32.4433	5.59429
3	0.8	0.95	High	278	2	O1	3	98.1133	72.7433	46.27	112.3	52.075	40.7531				14.1867	20.6683	5.51686
3	0.8	0.95	High	278	2	O1	3	98.1133	72.7433	46.27	117.825	56.15	40.8236				19.7117	16.5933	5.44643
3	0.8	0.95	High	278	2	O1	3	98.1133	72.7433	46.27	110.425	44.525	40.8938				12.3117	28.2183	5.37623
3	0.8	0.95	High	278	2	O1	3	98.1133	72.7433	46.27	112.85	53.575	40.9672				14.7367	19.1683	5.30277
3	0.8	0.95	High	278	2	O1	3	98.1133	72.7433	46.27	105.9	54.625	41.0412				7.78667	18.1183	5.22878
3	0.8	0.95	High	278	2	O2	1	65.9933	65.9933	94.82	62.3833	63.2	91.0899	1.14419	1.96387	0.374562	3.61	2.79333	3.73013
3	0.8	0.95	High	278	2	O2	1	65.9933	65.9933	94.82	61.9667	62.3667	91.2172				4.02667	3.62667	3.60277
3	0.8	0.95	High	278	2	O2	1	65.9933	65.9933	94.82	63.2833	60.8833	91.338				2.71	5.11	3.48201
3	0.8	0.95	High	278	2	O2	1	65.9933	65.9933	94.82	63.6333	61.5	91.4661				2.36	4.49333	3.35388
3	0.8	0.95	High	278	2	O2	1	65.9933	65.9933	94.82	63.75	58.2833	91.5905				2.24333	7.71	3.2295
3	0.8	0.95	High	278	2	O2	1	65.9933	65.9933	94.82	61.7667	60.2833	91.7047				4.22667	5.71	3.11532
3	0.8	0.95	High	278	2	O2	1	65.9933	65.9933	94.82	63.3833	61.8333	91.8374				2.61	4.16	2.98255
3	0.8	0.95	High	278	2	O2	1	65.9933	65.9933	94.82	60.0667	56.8833	91.9617				5.92667	9.11	2.85825
3	0.8	0.95	High	278	2	O2	1	65.9933	65.9933	94.82	63.3167	62.4167	92.0817				2.67667	3.57667	2.73831
3	0.8	0.95	High	278	2	O2	1	65.9933	65.9933	94.82	62.1	60.1833	92.2025				3.89333	5.81	2.61748
3	0.8	0.95	High	278	2	O2	2	64.885	64.885	94.8967	61.15	60.1333	91.8476	0.432224	1.40208	0.452892	3.735	4.75167	3.04908
3	0.8	0.95	High	278	2	O2	2	64.885	64.885	94.8967	60.8167	59.5833	91.9912				4.06833	5.30167	2.90546
3	0.8	0.95	High	278	2	O2	2	64.885	64.885	94.8967	60.5667	58.7	92.1454				4.31833	6.185	2.75122
3	0.8	0.95	High	278	2	O2	2	64.885	64.885	94.8967	60.5333	58.6667	92.2946				4.35167	6.21833	2.60203
3	0.8	0.95	High	278	2	O2	2	64.885	64.885	94.8967	60.6333	58.7333	92.4439				4.25167	6.15167	2.45277
3	0.8	0.95	High	278	2	O2	2	64.885	64.885	94.8967	60.75	59.6	92.5937				4.135	5.285	2.30294
3	0.8	0.95	High	278	2	O2	2	64.885	64.885	94.8967	60.4833	58.9333	92.7429				4.40167	5.95167	2.15379
3	0.8	0.95	High	278	2	O2	2	64.885	64.885	94.8967	59.8333	58.8167	92.8879				5.05167	6.06833	2.00873
3	0.8	0.95	High	278	2	O2	2	64.885	64.885	94.8967	60.0333	56.2167	93.0477				4.85167	8.66833	1.84892
3	0.8	0.95	High	278	2	O2	2	64.885	64.885	94.8967	59.85	55.85	93.1896				5.035	9.035	1.70704
3	0.8	0.95	High	278	2	O2	3	63.6867	63.6867	94.8967	57.2	54.8833	92.5006	1.01197	2.15575	0.287885	6.48667	8.80333	2.3961
3	0.8	0.95	High	278	2	O2	3	63.6867	63.6867	94.8967	60.1833	48.1833	92.6033				3.50333	15.5033	2.29337
3	0.8	0.95	High	278	2	O2	3	63.6867	63.6867	94.8967	58.9333	54.0167	92.6972				4.75333	9.67	2.19943
3	0.8	0.95	High	278	2	O2	3	63.6867	63.6867	94.8967	58.1	50.6	92.7887				5.58667	13.0867	2.10799
3	0.8	0.95	High	278	2	O2	3	63.6867	63.6867	94.8967	58.9833	52.9167	92.8831				4.70333	10.77	2.01356
3	0.8	0.95	High	278	2	O2	3	63.6867	63.6867	94.8967	58.5167	50.5667	92.9777				5.17	13.12	1.91899
3	0.8	0.95	High	278	2	O2	3	63.6867	63.6867	94.8967	56.8833	49.5333	93.0746				6.80333	14.1533	1.82207
3	0.8	0.95	High	278	2	O2	3	63.6867	63.6867	94.8967	57.4667	53.9333	93.171				6.22	9.75333	1.7257
3	0.8	0.95	High	278	2	O2	3	63.6867	63.6867	94.8967	58.8333	51.3	93.2666				4.85333	12.3867	1.63007
3	0.8	0.95	High	278	2	O2	3	63.6867	63.6867	94.8967	59.1167	51.3167	93.3589				4.57	12.37	1.53781
3	0.8	0.95	High	278	2	O3	1	120.858	120.858	154.833	112.5	123.9	151.94	5.28579	0.305505	0.303376	8.3575	3.0425	2.89374
3	0.8	0.95	High	278	2	O3	1	120.858	120.858	154.833	115.5	123.9	152.042				5.3575	3.0425	2.7912
3	0.8	0.95	High	278	2	O3	1	120.858	120.858	154.833	100.1	123.9	152.144				20.7575	3.0425	2.68954
3	0.8	0.95	High	278	2	O3	1	120.858	120.858	154.833	116.9	124.5	152.238				3.9575	3.6425	2.59514
3	0.8	0.95	High	278	2	O3	1	120.858	120.858	154.833	108.3	124.2	152.35				12.5575	3.3425	2.48353
3	0.8	0.95	High	278	2	O3	1	120.858	120.858	154.833	116.6	124.1	152.446				4.2575	3.2425	2.38713
3	0.8	0.95	High	278	2	O3	1	120.858	120.858	154.833	113.1	124.1	152.546				7.7575	3.2425	2.28716
3	0.8	0.95	High	278	2	O3	1	120.858	120.858	154.833	118	124.1	152.654				2.8575	3.2425	2.17945
3	0.8	0.95	High	278	2	O3	1	120.858	120.858	154.833	114.8	124.5	152.716				6.0575	3.6425	2.117
3	0.8	0.95	High	278	2	O3	1	120.858	120.858	154.833	112.4	124.8	152.854				8.4575	3.9425	1.97901
3	0.8	0.95	High	278	2	O3	2	119.83	119.83	155.667	114.8	99.3	152.806	1.20996	7.38328	0.194178	5.03	20.53	2.86039
3	0.8	0.95	High	278	2	O3	2	119.83	119.83	155.667	118	122.8	152.893				1.83	2.97	2.77409
3	0.8	0.95	High	278	2	O3	2	119.83	119.83	155.667	117.2	122.8	152.947				2.63	2.97	2.71963
3	0.8	0.95	High	278	2	O3	2	119.83	119.83	155.667	117.8	122.2	152.993				2.03	2.37	2.67407
3	0.8	0.95	High	278	2	O3	2	119.83	119.83	155.667	117.4	122.5	153.068				2.43	2.67	2.59872
3	0.8	0.95	High	278	2	O3	2	119.83	119.83	155.667	114.8	121.8	153.142				5.03	1.97	2.52477
3	0.8	0.95	High	278	2	O3	2	119.83	119.83	155.667	117.7	123	153.202				2.13	3.17	2.46419
3	0.8	0.95	High	278	2	O3	2	119.83	119.83	155.667	117.7	122.5	153.261				2.13	2.67	2.40549
3	0.8	0.95	High	278	2	O3	2	119.83	119.83	155.667	117.5	123.3	153.325				2.33	3.47	2.34187
3	0.8	0.95	High	278	2	O3	2	119.83	119.83	155.667	116.3	122.6	153.392				3.53	2.77	2.27443
3	0.8	0.95	High	278	2	O3	3	121.557	121.557	154.25	119	122.2	151.037	1.95266	1.69771	0.171576	2.55667	0.643333	3.21294
3	0.8	0.95	High	278	2	O3	3	121.557	121.557	154.25	119.3	117	151.112				2.25667	4.55667	3.13789
3	0.8	0.95	High	278	2	O3	3	121.557	121.557	154.25	118.9	119	151.176				2.65667	2.55667	3.07392
3	0.8	0.95	High	278	2	O3	3	121.557	121.557	154.25	119.5	121.5	151.229				2.05667	0.0566667	3.02126
3	0.8	0.95	High	278	2	O3	3	121.557	121.557	154.25	113.6	122	151.288				7.95667	0.443333	2.96177
3	0.8	0.95	High	278	2	O3	3	121.557	121.557	154.25	119.6	121.1	151.343				1.95667	0.456667	2.90654
3	0.8	0.95	High	278	2	O3	3	121.557	121.557	154.25	119.6	122.7	151.39				1.95667	1.14333	2.85983
3	0.8	0.95	High	278	2	O3	3	121.557	121.557	154.25	116.3	121.5	151.449				5.25667	0.0566667	2.80086
3	0.8	0.95	High	278	2	O3	3	121.557	121.557	154.25	119	120.5	151.501				2.55667	1.05667	2.74909
3	0.8	0.95	High	278	2	O3	3	121.557	121.557	154.25	119.4	120.5	151.561				2.15667	1.05667	2.68912
3	0.8	0.85	High	93	7	O1	1	98.14	72.7333	47.4933	70.65	66.9	39.1789	9.91716	7.08956	2.62252	27.49	5.83333	8.31442
3	0.8	0.85	High	93	7	O1	1	98.14	72.7333	47.4933	71.675	51.25	40.0275				26.465	21.4833	7.46583
3	0.8	0.85	High	93	7	O1	1	98.14	72.7333	47.4933	82.825	59.075	40.874				15.315	13.6583	6.61929
3	0.8	0.85	High	93	7	O1	1	98.14	72.7333	47.4933	71.75	56.075	41.7513				26.39	16.6583	5.74206
3	0.8	0.85	High	93	7	O1	1	98.14	72.7333	47.4933	94.075	54.15	42.6099				4.065	18.5833	4.88341
3	0.8	0.85	High	93	7	O1	1	98.14	72.7333	47.4933	71.075	53.1	43.4846				27.065	19.6333	4.00878
3	0.8	0.85	High	93	7	O1	1	98.14	72.7333	47.4933	75.775	68.15	44.3215				22.365	4.58333	3.17183
3	0.8	0.85	High	93	7	O1	1	98.14	72.7333	47.4933	71.075	67.55	45.1785				27.065	5.18333	2.31479
3	0.8	0.85	High	93	7	O1	1	98.14	72.7333	47.4933	93.05	62.225	46.1445				5.09	10.5083	1.34887
3	0.8	0.85	High	93	7	O1	1	98.14	72.7333	47.4933	90.6	70.475	46.9552				7.54	2.25833	0.538122
3	0.8	0.85	High	93	7	O1	2	98.2033	72.8067	47.03	103.225	64.9	40.5523	18.4191	5.25976	0.920676	5.02167	7.90667	6.47766
3	0.8	0.85	High	93	7	O1	2	98.2033	72.8067	47.03	71.025	52.65	41.0815				27.1783	20.1567	5.94845
3	0.8	0.85	High	93	7	O1	2	98.2033	72.8067	47.03	72.675	62	41.6362				25.5283	10.8067	5.39377
3	0.8	0.85	High	93	7	O1	2	98.2033	72.8067	47.03	67.775	56.65	42.1732				30.4283	16.1567	4.85677
3	0.8	0.85	High	93	7	O1	2	98.2033	72.8067	47.03	71.45	65.875	40.1732				26.7533	6.93167	6.85677
3	0.8	0.85	High	93	7	O1	2	98.2033	72.8067	47.03	95.975	56.325	40.7575				2.22833	16.4817	6.27251
3	0.8	0.85	High	93	7	O1	2	98.2033	72.8067	47.03	72.3	70.825	41.3353				25.9033	1.98167	5.6947
3	0.8	0.85	High	93	7	O1	2	98.2033	72.8067	47.03	49.8	59.575	41.8873				48.4033	13.2317	5.1427
3	0.8	0.85	High	93	7	O1	2	98.2033	72.8067	47.03	95.25	61.15	42.6564				2.95333	11.6567	4.37363
3	0.8	0.85	High	93	7	O1	2	98.2033	72.8067	47.03	48.95	61.275	43.0048				49.2533	11.5317	4.02516
3	0.8	0.85	High	93	7	O1	3	98.1133	72.7433	46.27	94.275	63.75	39.2505	8.62279	3.13332	2.3183	3.83833	8.99333	7.01954
3	0.8	0.85	High	93	7	O1	3	98.1133	72.7433	46.27	100.5	69.275	40.0063				2.38667	3.46833	6.26369
3	0.8	0.85	High	93	7	O1	3	98.1133	72.7433	46.27	102.025	76.325	40.743				3.91167	3.58167	5.52703
3	0.8	0.85	High	93	7	O1	3	98.1133	72.7433	46.27	94.575	67.9	41.5239				3.53833	4.84333	4.74606
3	0.8	0.85	High	93	7	O1	3	98.1133	72.7433	46.27	94.85	70.9	42.2764				3.26333	1.84333	3.99359
3	0.8	0.85	High	93	7	O1	3	98.1133	72.7433	46.27	96.825	71.35	43.0551				1.28833	1.39333	3.21492
3	0.8	0.85	High	93	7	O1	3	98.1133	72.7433	46.27	93.45	70.725	43.793				4.66333	2.01833	2.47696
3	0.8	0.85	High	93	7	O1	3	98.1133	72.7433	46.27	96.2	70.475	44.6014				1.91333	2.26833	1.66865
3	0.8	0.85	High	93	7	O1	3	98.1133	72.7433	46.27	70.85	69.025	45.3921				27.2633	3.71833	0.877881
3	0.8	0.85	High	93	7	O1	3	98.1133	72.7433	46.27	89.925	70.15	46.1126				8.18833	2.59333	0.15744
3	0.8	0.85	High	93	7	O2	1	65.9933	65.9933	94.82	54.7667	54.0333	84.8245	1.55554	3.3381	2.60191	11.2267	11.96	9.9955
3	0.8	0.85	High	93	7	O2	1	65.9933	65.9933	94.82	54.9	57.6833	85.7196				11.0933	8.31	9.10037
3	0.8	0.85	High	93	7	O2	1	65.9933	65.9933	94.82	55.2667	54.1167	86.5349				10.7267	11.8767	8.28506
3	0.8	0.85	High	93	7	O2	1	65.9933	65.9933	94.82	52.9667	57.8667	87.4142				13.0267	8.12667	7.40576
3	0.8	0.85	High	93	7	O2	1	65.9933	65.9933	94.82	53.4	59.8833	88.233				12.5933	6.11	6.58702
3	0.8	0.85	High	93	7	O2	1	65.9933	65.9933	94.82	52.3833	57.7333	89.1076				13.61	8.26	5.71243
3	0.8	0.85	High	93	7	O2	1	65.9933	65.9933	94.82	54.8	59.2333	89.9772				11.1933	6.76	4.84283
3	0.8	0.85	High	93	7	O2	1	65.9933	65.9933	94.82	50.8333	55.55	90.83				15.16	10.4433	3.99004
3	0.8	0.85	High	93	7	O2	1	65.9933	65.9933	94.82	55.9833	54.6333	91.7077				10.01	11.36	3.11235
3	0.8	0.85	High	93	7	O2	1	65.9933	65.9933	94.82	53.4667	48.5167	92.5844				12.5267	17.4767	2.23557
3	0.8	0.85	High	93	7	O2	2	64.885	64.885	94.8967	52.35	59.4	84.7382	1.7125	2.60527	2.5297	12.535	5.485	10.1584
3	0.8	0.85	High	93	7	O2	2	64.885	64.885	94.8967	52.6167	56.5667	85.6183				12.2683	8.31833	9.27838
3	0.8	0.85	High	93	7	O2	2	64.885	64.885	94.8967	51.4333	57.45	86.4063				13.4517	7.435	8.49034
3	0.8	0.85	High	93	7	O2	2	64.885	64.885	94.8967	50.7833	58.6333	87.2753				14.1017	6.25167	7.62137
3	0.8	0.85	High	93	7	O2	2	64.885	64.885	94.8967	49.2	56.8333	88.1064				15.685	8.05167	6.79029
3	0.8	0.85	High	93	7	O2	2	64.885	64.885	94.8967	48.5333	55.2667	88.9467				16.3517	9.61833	5.94995
3	0.8	0.85	High	93	7	O2	2	64.885	64.885	94.8967	50.1833	54.55	89.7554				14.7017	10.335	5.14131
3	0.8	0.85	High	93	7	O2	2	64.885	64.885	94.8967	47.6167	53.3	90.6001				17.2683	11.585	4.29655
3	0.8	0.85	High	93	7	O2	2	64.885	64.885	94.8967	48.3333	51.4833	91.4636				16.5517	13.4017	3.43308
3	0.8	0.85	High	93	7	O2	2	64.885	64.885	94.8967	50.5833	52.75	92.2597				14.3017	12.135	2.63701
3	0.8	0.85	High	93	7	O2	3	63.6867	63.6867	94.8967	44.2667	53.6333	84.7297	1.99197	2.01682	2.52951	19.42	10.0533	10.1669
3	0.8	0.85	High	93	7	O2	3	63.6867	63.6867	94.8967	50.7	55.4167	84.7297				12.9867	8.27	10.1669
3	0.8	0.85	High	93	7	O2	3	63.6867	63.6867	94.8967	49.9667	52.6	86.5307				13.72	11.0867	8.36596
3	0.8	0.85	High	93	7	O2	3	63.6867	63.6867	94.8967	46.6333	52.6333	87.2456				17.0533	11.0533	7.65111
3	0.8	0.85	High	93	7	O2	3	63.6867	63.6867	94.8967	48.65	49.95	88.0753				15.0367	13.7367	6.82138
3	0.8	0.85	High	93	7	O2	3	63.6867	63.6867	94.8967	48.4	51.1667	88.86				15.2867	12.52	6.03671
3	0.8	0.85	High	93	7	O2	3	63.6867	63.6867	94.8967	49.1667	50.8167	89.6042				14.52	12.87	5.29247
3	0.8	0.85	High	93	7	O2	3	63.6867	63.6867	94.8967	50.1167	53.5167	90.4107				13.57	10.17	4.48594
3	0.8	0.85	High	93	7	O2	3	63.6867	63.6867	94.8967	48.8	49.1667	91.1721				14.8867	14.52	3.72452
3	0.8	0.85	High	93	7	O2	3	63.6867	63.6867	94.8967	50.6667	49.75	91.9178				13.02	13.9367	2.97892
3	0.8	0.85	High	93	7	O3	1	120.858	120.858	154.833	117.7	117.4	149.196	5.38616	3.93312	0.665498	3.1575	3.4575	5.63779
3	0.8	0.85	High	93	7	O3	1	120.858	120.858	154.833	116.3	119.2	149.411				4.5575	1.6575	5.42212
3	0.8	0.85	High	93	7	O3	1	120.858	120.858	154.833	117.3	118.3	149.634				3.5575	2.5575	5.19941
3	0.8	0.85	High	93	7	O3	1	120.858	120.858	154.833	115.1	117.9	149.883				5.7575	2.9575	4.9502
3	0.8	0.85	High	93	7	O3	1	120.858	120.858	154.833	116.4	119.9	150.084				4.4575	0.9575	4.74946
3	0.8	0.85	High	93	7	O3	1	120.858	120.858	154.833	118.8	117.8	150.287				2.0575	3.0575	4.54599
3	0.8	0.85	High	93	7	O3	1	120.858	120.858	154.833	101.1	118.7	150.511				19.7575	2.1575	4.32263
3	0.8	0.85	High	93	7	O3	1	120.858	120.858	154.833	119.4	116.4	150.722				1.4575	4.4575	4.11161
3	0.8	0.85	High	93	7	O3	1	120.858	120.858	154.833	119	106.1	150.978				1.8575	14.7575	3.85535
3	0.8	0.85	High	93	7	O3	1	120.858	120.858	154.833	113.1	117.8	151.17				7.7575	3.0575	3.66355
3	0.8	0.85	High	93	7	O3	2	119.83	119.83	155.667	120.1	116	146.704	1.79385	1.51441	0.954358	0.27	3.83	8.96281
3	0.8	0.85	High	93	7	O3	2	119.83	119.83	155.667	118.5	116.9	147.02				1.33	2.93	8.64691
3	0.8	0.85	High	93	7	O3	2	119.83	119.83	155.667	114	117.4	147.319				5.83	2.43	8.34783
3	0.8	0.85	High	93	7	O3	2	119.83	119.83	155.667	120	117.4	147.599				0.17	2.43	8.06779
3	0.8	0.85	High	93	7	O3	2	119.83	119.83	155.667	119.2	117.1	147.945				0.63	2.73	7.72216
3	0.8	0.85	High	93	7	O3	2	119.83	119.83	155.667	119.4	115.5	148.237				0.43	4.33	7.42941
3	0.8	0.85	High	93	7	O3	2	119.83	119.83	155.667	117.7	118.3	148.6				2.13	1.53	7.06654
3	0.8	0.85	High	93	7	O3	2	119.83	119.83	155.667	119.5	118	148.896				0.33	1.83	6.7705
3	0.8	0.85	High	93	7	O3	2	119.83	119.83	155.667	118.7	113.1	149.191				1.13	6.73	6.47558
3	0.8	0.85	High	93	7	O3	2	119.83	119.83	155.667	119.6	116	149.55				0.23	3.83	6.11664
3	0.8	0.85	High	93	7	O3	3	121.557	121.557	154.25	121.8	115.4	146.509	14.7167	1.41833	0.338279	0.243333	6.15667	7.74112
3	0.8	0.85	High	93	7	O3	3	121.557	121.557	154.25	120.8	117.2	146.648				0.756667	4.35667	7.60185
3	0.8	0.85	High	93	7	O3	3	121.557	121.557	154.25	110.7	114.5	146.734				10.8567	7.05667	7.51628
3	0.8	0.85	High	93	7	O3	3	121.557	121.557	154.25	121.6	119.1	146.856				0.0433333	2.45667	7.39372
3	0.8	0.85	High	93	7	O3	3	121.557	121.557	154.25	119.9	117.4	146.989				1.65667	4.15667	7.26125
3	0.8	0.85	High	93	7	O3	3	121.557	121.557	154.25	121.4	118.6	147.069				0.156667	2.95667	7.18145
3	0.8	0.85	High	93	7	O3	3	121.557	121.557	154.25	119.5	117.2	147.21				2.05667	4.35667	7.04022
3	0.8	0.85	High	93	7	O3	3	121.557	121.557	154.25	117.5	117.9	147.283				4.05667	3.65667	6.96705
3	0.8	0.85	High	93	7	O3	3	121.557	121.557	154.25	73.7	117.9	147.422				47.8567	3.65667	6.82845
3	0.8	0.85	High	93	7	O3	3	121.557	121.557	154.25	118.5	118.3	147.522				3.05667	3.25667	6.72796
3	0.8	0.75	High	56	9	O1	1	98.14	72.7333	47.4933	32.7667	37.6667	39.4354	21.4555	10.5837	2.38006	65.3733	35.0667	8.05789
3	0.8	0.75	High	56	9	O1	1	98.14	72.7333	47.4933	102	53.3	40.1879				3.86	19.4333	7.30547
3	0.8	0.75	High	56	9	O1	1	98.14	72.7333	47.4933	95.4333	69.4	41.0481				2.70667	3.33333	6.44527
3	0.8	0.75	High	56	9	O1	1	98.14	72.7333	47.4933	64.1667	58.3	41.8753				33.9733	14.4333	5.61806
3	0.8	0.75	High	56	9	O1	1	98.14	72.7333	47.4933	92.8333	64.6	42.6588				5.30667	8.13333	4.83457
3	0.8	0.75	High	56	9	O1	1	98.14	72.7333	47.4933	95.2333	55.7	43.4301				2.90667	17.0333	4.06319
3	0.8	0.75	High	56	9	O1	1	98.14	72.7333	47.4933	87	66.4333	44.1696				11.14	6.3	3.32372
3	0.8	0.75	High	56	9	O1	1	98.14	72.7333	47.4933	96.3667	69.6	44.9429				1.77333	3.13333	2.5504
3	0.8	0.75	High	56	9	O1	1	98.14	72.7333	47.4933	98.7	70.9	45.7228				0.56	1.83333	1.7705
3	0.8	0.75	High	56	9	O1	1	98.14	72.7333	47.4933	95.2667	50.9333	46.5263				2.87333	21.8	0.967049
3	0.8	0.75	High	56	9	O1	2	98.2033	72.8067	47.03	94.65	68.65	37.4984	13.5223	3.45477	1.48306	3.55333	4.15667	9.53156
3	0.8	0.75	High	56	9	O1	2	98.2033	72.8067	47.03	94.85	58.575	37.9808				3.35333	14.2317	9.04924
3	0.8	0.75	High	56	9	O1	2	98.2033	72.8067	47.03	95	69.125	38.4599				3.20333	3.68167	8.57015
3	0.8	0.75	High	56	9	O1	2	98.2033	72.8067	47.03	94.525	68.525	38.9402				3.67833	4.28167	8.0898
3	0.8	0.75	High	56	9	O1	2	98.2033	72.8067	47.03	92.7	65.475	39.44				5.50333	7.33167	7.59004
3	0.8	0.75	High	56	9	O1	2	98.2033	72.8067	47.03	50.85	68.075	39.8997				47.3533	4.73167	7.13034
3	0.8	0.75	High	56	9	O1	2	98.2033	72.8067	47.03	91.525	61.8	40.4061				6.67833	11.0067	6.6239
3	0.8	0.75	High	56	9	O1	2	98.2033	72.8067	47.03	92.425	68.4	40.9029				5.77833	4.40667	6.12714
[truncated: 2,592 more rows]
